# Supplementary material for: Blast injuries in children: a mixed-methods narrative review
Source: PubMed Central journal article supplement — BMJ Paediatr Open. 2019 Sep 3;3(1):e000452. doi: 10.1136/bmjpo-2019-000452 (PMC6733323; doi:10.1136/bmjpo-2019-000452), 2019-09-03

# BMJ Paediatrics Open

BMJ Paediatrics Open is committed to open peer review. As part of this commitment we make the peer review history of every article we publish publicly available.

When an article is published we post the peer reviewers' comments and the authors' responses online. We also post the versions of the paper that were used during peer review. These are the versions that the peer review comments apply to.

The versions of the paper that follow are the versions that were submitted during the peer review process. They are not the versions of record or the final published versions. They should not be cited or distributed as the published version of this manuscript.

BMJ Paediatrics Open is an open access journal and the full, final, typeset and author-corrected version of record of the manuscript is available on our site with no access controls, subscription charges or pay-per-view fees (<http://bmjpaedsopen.bmj.com>).

If you have any questions on BMJ Paediatrics Open's open peer review process please email [info.bmjpo@bmj.com](mailto:info.bmjpo@bmj.com)

# BMJ Paediatrics Open

## Caring for the Future: Global Characteristics of the Blast Injured Child

|                               |                                                                                                                                                                                                                                                          |
|-------------------------------|----------------------------------------------------------------------------------------------------------------------------------------------------------------------------------------------------------------------------------------------------------|
| Journal:                      | <i>BMJ Paediatrics Open</i>                                                                                                                                                                                                                              |
| Manuscript ID                 | bmjpo-2019-000452                                                                                                                                                                                                                                        |
| Article Type:                 | Original article                                                                                                                                                                                                                                         |
| Date Submitted by the Author: | 15-Feb-2019                                                                                                                                                                                                                                              |
| Complete List of Authors:     | Milwood Hargrave, John; Bioengineering<br>Bull, Anthony; Dept of Bioengineering<br>Pearce, Phillip; Dept of Bioengineering<br>Mayhew, Emily; Imperial College London, Bioengineering<br>Taylor, Sebastian; Royal College of Paediatrics and Child Health |
| Keywords:                     | Paediatric Practice, Paediatric Surgery, Accident & Emergency, General Paediatrics                                                                                                                                                                       |
|                               |                                                                                                                                                                                                                                                          |

SCHOLARONE™  
Manuscripts

1  
2  
3 Title:

4  
5 ***Caring for the Future: Global Characteristics of the Blast Injured Child***  
6  
7

8 Corresponding author:

9 Emily Mayhew

10 Dept. of Bioengineering, Imperial College London

11 Queensgate

12 London SW7 2AZ

13 Tel: 074949 63074

14 Email: e.mayhew@imperial.ac.uk  
15  
16  
17  
18  
19  
20  
21

22 Authors:

23 John F.S. Millwood Hargrave,

24 South Thames Foundation School

25 Royal Army Medical Corps

26 208 Field Hospital, London, UK  
27  
28  
29  
30  
31

32 A.Phillip Pearce,

33 Centre for Blast Injury Studies

34 Imperial College London  
35  
36  
37  
38

39 Emily R. Mayhew,

40 Dept of Bioengineering

41 Imperial College London  
42  
43  
44  
45

46 Anthony M.J. Bull,

47 Dept of Bioengineering

48 Imperial College London  
49  
50  
51  
52

53 Sebastian Taylor

54 Royal College of Paediatrics and Child Health

55 London  
56  
57  
58  
59  
60

1  
2  
3 Keywords: Paediatric, blast, trauma, conflict, outcomes  
4  
5

6 Wordcount: 5,000.  
7  
8  
9

10  
11  
12  
13  
14  
15  
16  
17  
18  
19  
20  
21  
22  
23  
24  
25  
26  
27  
28  
29  
30  
31  
32  
33  
34  
35  
36  
37  
38  
39  
40  
41  
42  
43  
44  
45  
46  
47  
48  
49  
50  
51  
52  
53  
54  
55  
56  
57  
58  
59  
60

Confidential: For Review Only

## Key questions

### What is already known about this topic?

- Approximately one in six children live in conflict zones, where exposure to blast injuries is not uncommon.
- Blast injuries have the potential to inflict significant mortality and morbidity upon the global paediatric population living in conflict zones.
- Describing the characteristics of injuries sustained by the paediatric population is essential in advancing local and global health policies.
- Despite this, common themes related to paediatric injury following to blasts are poorly described.

### What are the new findings?

- The demographics, mortality and injuries that are specific characteristics of blast injuries upon the paediatric population are described.
- Children are uniquely vulnerable to different injury patterns following blast injuries compared to adults.
- Treatment service requirement for the paediatric population is significant and disproportionate compared to cohort size, and provisions for increased operative and bed requirement is essential.

### Recommendations for policy

- These results highlight and quantify the scope of the paediatric injury burden posed by blasts.
- These results highlight priorities in caring for the paediatric population, and where future service provision can be optimised.

## Abstract

**Background and significance.** Blast injuries arising from high explosive weaponry is common in conflict areas. While blast injury characteristics are well recognised in the adults, there is a lack of consensus as to whether these characteristics translate to the paediatric population. Understanding blast injury patterns in this cohort is essential for providing appropriate provision of services and care for this vulnerable cohort.

**Methods.** In this mixed-method review, original papers were screened for data pertaining to paediatric injuries following blasts. Information on demographics, morbidity and mortality and service requirements were evaluated.

**Results.** Children affected by blast injuries are predominantly male and their injuries arise from explosive remnants of war, particularly unexploded ordnance. Blasts show increased morbidity and mortality in younger children, while older children have injury patterns similar to adults. Head and burn injuries represent a significant cause of mortality in young children, while lower limb morbidity is reduced compared to adults. Children have a disproportionate requirement for both operative and non-operative service resources, and provisions for this burden are essential.

**Conclusions.** Certain characteristics of paediatric injuries arising from blasts are distinct from that of the adult cohort, while the intensive demands on services highlights the importance of understanding the diverse injury patterns in order to optimise future service provisions in caring for this vulnerable cohort.

## 1. Introduction

Approximately one in six children live in conflict zones, with the main global burden borne by citizens of low and middle income countries (LMICs)(1). Children enmeshed in conflict and post-conflict zones are frequently exposed to high-order explosives (HE), either through explosive remnants of war (ERW) such as landmines and unexploded ordinance (UXOs), military ordinance such as shelling and aerial bombardments or acts perpetrated by non-state actors such as improvised explosive devices (IEDs) and suicide bombing(2). HE can inflict unique and unusual injuries upon the child through the blast over-pressure wave (primary blast injury), energisation of materials causing fragmentation (secondary blast injury), bodily displacement or crush injuries (tertiary blast injuries) and through burns, inhalation, toxic or psychological trauma (quaternary blast injuries)(3).

Article 3.3 of the UN Convention on the Rights of the Child (UNCRC) states that medical care of the child be delivered and supervised by providers competent in that field(4). However, paediatric care in conflict zones is often delivered by personnel for whom experience of dealing with paediatric blast injuries is unusual(5). Primary studies increasingly recognise the complex patterns of injury sustained in the adult population following blast exposure(3), however there is a lack of consensus as to whether applying lessons learnt from the adult population translates appropriately into paediatric cohorts(6). Bree et al(7) argue that principles for life-saving interventions, such as prioritising catastrophic haemorrhage, airway, breathing and circulation are just as applicable in children as adults. Conversely Fendya et al(8) contend that directly applying adult trauma principles to the paediatric population neglects the social, anatomical, physiological and psychological differences between adults and children, affecting the validity of these inferences.

While primary studies have described injuries sustained by the blast injured child, no study has attempted to synthesise the data to identify recurrent characteristics in this vulnerable cohort. Understanding the characteristics of such injuries to the paediatric population will advance efforts to prevent, mitigate, and treat these injuries in domestic and deployed health systems(3). The aim of this review is to provide an overview of injury patterns and challenges in caring for the blast-injured child, in order to define future research needs for protection, mitigation, immediate medical treatment, and rehabilitation.

## 2. Methods

In this mixed-methods review, original peer-reviewed quantitative, qualitative and mixed-method observational studies, in addition to grey literature, were screened for data on

1  
2  
3 explosive injuries in paediatric cohorts. By utilising all study designs, greater capture of  
4 relevant literature was achieved, although this meant the data was unsuitable for a formal  
5 systematic review. PubMed and Scopus (including Embase) were searched. Search terms  
6 including “Paediatric” OR “Pediatric” OR “Child\*” OR “Children” AND “Blast” OR “Explosi\*” OR  
7 “Explosion” were used to capture potential studies. Articles had to be written in English and  
8 published before December 16, 2018. Studies involving adult as well as children were  
9 included, in addition to articles where the mechanism of injury was mixed. This decision was  
10 taken in order to accurately reflect the settings the studies represent, where victims in conflict  
11 zones are heterogenous and subject to a variety of combat related mechanisms. Studies were  
12 omitted if they did not specify explosive mechanisms or include children.  
13  
14  
15  
16  
17  
18  
19

20 Children are defined as all humans under the age of eighteen years (as specified by the United  
21 Nations Convention on the Rights of the Child)(4). The heterogeneity and arbitrary nature of  
22 what defines a child is acknowledged, and studies often utilise individual definitions. Within  
23 this review ages are defined thus: <1 year are infants, 1-8 are young children; 9-13 are older  
24 children and 14-18 are adolescents.  
25  
26  
27  
28  
29  
30  
31  
32  
33  
34  
35  
36  
37  
38  
39  
40  
41  
42  
43  
44  
45  
46  
47  
48  
49  
50  
51  
52  
53  
54  
55  
56  
57  
58  
59  
60



### 3. Results

47,580 eligible studies were found following academic database searches, of which 4,433 were removed as duplicates, leaving 43,147 of papers for title assessment. 906 (2.1%) of these papers had their abstracts assessed, of which 242 (0.6%) studies were included for full text review. Data were extracted from 74 (0.2%) studies for use within this review (Table 1).

Table 1. The 74 studies included within the review

|                                   | Monitoring period | Location                                        | Setting  | Sample Size | Population                      | Exposure                                                                    | Study                                                           | Effect investigated    |
|-----------------------------------|-------------------|-------------------------------------------------|----------|-------------|---------------------------------|-----------------------------------------------------------------------------|-----------------------------------------------------------------|------------------------|
| Aharonson-Daniel et al (2003)(9)  | 2000-2001         | Israel                                          | Civilian | 138         | Paediatric (100%)               | IEDs/Suicide IEDs (67%)<br>GSW (25%)<br>Other (8%)                          | Retrospective.<br>National Trauma Registry                      | Injuries and Mortality |
| Aharonson-Daniel et al (2006)(10) | 2000-2004         | Israel                                          | Civilian | 1155        | Paediatric (8%)<br>Adult (92%)  | Suicide IEDs (100%)                                                         | Retrospective.<br>National Trauma Registry                      | Injuries and mortality |
| Al-Worikat et al (2001)(11)       | 1988-2000         | Jordan                                          | Civilian | 226         | Paediatric (10%)<br>Adult (90%) | Landmines (100%)                                                            | Retrospective.<br>Hospital based case series                    | Long term sequelae     |
| Amir et al (2005)(12)             | 2000-2002         | Israel                                          | Civilian | 148         | Paediatric (100%)               | IEDs/Shelling (66%)<br>GSW (34%)                                            | Retrospective.<br>National Trauma Registry                      | Injuries and mortality |
| Andersson et al (1995)(13)        | 1994-1995         | Afghanistan<br>Bosnia<br>Cambodia<br>Mozambique | Civilian | 2100        | Paediatric (100%)               | Landmines (100%)                                                            | Retrospective.<br>community surveillance                        | Socio-economic         |
| Arafat et al (2017)(14)           | 2012-2013         | Syria                                           | Civilian | 324         | Paediatric (18%)<br>Adult (82%) | IEDs/Shelling (57%)<br>GSW (43%)                                            | Retrospective. Multi-centre Hospital based case series          | Injuries and mortality |
| Arul et al (2012)(15)             | 2011              | Afghanistan                                     | Military | 82          | Paediatric (100%)               | IEDs/Shelling (52%)<br>GSW (11%)<br>Non-combat (37%)                        | Retrospective. Single centre Hospital based case series         | Injuries and mortality |
| Bajec et al (1993)(16)            | 1991              | Kuwait                                          | Civilian | 152         | Paediatric (12%)<br>Adult (88%) | Landmines (100%)                                                            | Retrospective. Single centre Hospital based case series         | Injuries and mortality |
| Beitler et al (2006)(17)          | 2002              | Afghanistan                                     | Military | 204         | Paediatric (28%)<br>Adult (72%) | Non-combat (44%)<br>IEDs/Shelling (36%)<br>GSW (20%)                        | Retrospective. Single centre Hospital based case series         | Injuries and mortality |
| Bendinelli et al (2009)(18)       | 2003-2006         | Cambodia                                        | Civilian | 356         | Paediatric (26%)<br>Adult (74%) | Landmines (67%)<br>UXO (33%)                                                | Retrospective. Multi centre Hospital based case series          | Injuries and mortality |
| Bertani et al (2015)(19)          | 2009-2013         | Afghanistan                                     | Military | 89          | Paediatric (100%)               | IEDs/Shelling (79%)<br>GSW (21%)                                            | Retrospective. Single centre Hospital based case series         | Injuries and mortality |
| Bilukha et al (2003)(20)          | 2001-2002         | Afghanistan                                     | Civilian | 1636        | Paediatric (46%)<br>Adult (54%) | UXO (47%)<br>Landmine (41%)<br>Other/Unknown (12%)                          | Retrospective.<br>Community Surveillance                        | Injuries and mortality |
| Bilukha et al (2007)(21)          | 1994-2005         | Chechnya                                        | Civilian | 3021        | Paediatric (30%)<br>Adult (70%) | Landmines (41%)<br>UXO (37%)<br>Other/Unknown (22%)                         | Retrospective.<br>Community Surveillance                        | Injuries and mortality |
| Bilukha et al (2008)(22)          | 2002-2006         | Afghanistan                                     | Civilian | 5471        | Paediatric (54%)<br>Adult (46%) | UXO (50%)<br>Landmines (42%)<br>Other/Unknown (8%)                          | Retrospective.<br>Community Surveillance                        | Injuries and mortality |
| Bilukha et al (2011)(23)          | 2006-2010         | Nepal                                           | Civilian | 307         | Paediatric (58%)<br>Adult (42%) | IEDs (76%)<br>Landmines (4%)<br>Other/Unknown (20%)                         | Retrospective.<br>Community Surveillance                        | Injuries and mortality |
| Bilukha et al (2013)(24)          | 2008-2011         | Nepal                                           | Civilian | 437         | Paediatric (14%)<br>Adult (76%) | IEDs (69%)<br>Other/Unknown (31%)                                           | Retrospective.<br>Community Surveillance                        | Injuries and mortality |
| Bilukha et al (2015)(25)          | 2010-2013         | Iraq                                            | Civilian | 2803        | Paediatric (13%)<br>Adult (87%) | IEDs (49%)<br>Other/Unknown (51%)                                           | Retrospective.<br>Military Trauma Registry                      | Injuries and mortality |
| Bitterman et al (2016)(26)        | 2013              | Israel                                          | Military | 84          | Paediatric (100%)               | IEDs/Shelling (67%)<br>GSW (23%)<br>Non-Combat (10%)                        | Retrospective.<br>Military Trauma Registry                      | Injuries and mortality |
| Borgman et al (2012)(27)          | 2001-2011         | Afghanistan<br>Iraq                             | Military | 128582      | Paediatric (6%)<br>Adult (94%)  | Non-Combat (40%)<br>IEDs/Shelling (38%)<br>GSW (22%)                        | Retrospective.<br>Military Trauma Registry                      | Injuries and mortality |
| Borgman et al (2015)(28)          | 2003-2011         | Afghanistan<br>Iraq                             | Military | 549         | Paediatric (100%)               | Non-Combat (84%)<br>IEDs/Shelling (11%)<br>Other/Unknown (5%)               | Retrospective.<br>Military Trauma Registry                      | Injuries and mortality |
| Borgman et al (2018)(29)          | 2002-2009         | Afghanistan<br>Iraq                             | Military | 707         | Paediatric (100%)               | IEDs/Shelling (44%)<br>Other/Unknown (56%)                                  | Retrospective.<br>Military Trauma Registry                      | Injuries and Mortality |
| Coppola et al (2006)(30)          | 2004-2005         | Iraq                                            | Military | 85          | Paediatric (100%)               | IEDs/Shelling (29%)<br>Non-combat (44%)<br>Other/Unknown (27%)              | Retrospective. Single centre Hospital based case series         | Injuries and Mortality |
| Can et al (2009)(31)              | 2001-2008         | Turkey                                          | Civilian | 23          | Paediatric (100%)               | Landmines (87%)<br>UXO (13%)                                                | Retrospective. Single centre Hospital based case series         | Injuries and mortality |
| Celikel et al (2014)(32)          | 2012              | Syria                                           | Civilian | 186         | Paediatric (22%)<br>Adult (78%) | IEDs/Shelling (67%)<br>GSW (26%)<br>Other/Unknown (7%)                      | Retrospective. Multi-centre Hospital based mortuary case series | Mortality              |
| Celikel et al (2015)(33)          | 2012-2014         | Syria                                           | Civilian | 140         | Paediatric (100%)               | IEDs/Shelling (70%)<br>GSW (14%)<br>Other/Unknown (16%)                     | Retrospective. Multi-centre Hospital based mortuary case series | Mortality              |
| Chehab et al (2018)(34)           | 2009-2012         | Afghanistan                                     | Military | 81          | Paediatric (100%)               | IEDs/Shelling (67%)<br>GSW (21%)<br>Stabbing (12%)                          | Retrospective. Single-centre Hospital based case series         | Injuries and mortality |
| Cremer et al (2009)(35)           | 2004-2007         | Afghanistan<br>Iraq                             | Military | 2090        | Paediatric (100%)               | GSW (29%)<br>IEDs/Shelling (24%)<br>Other/Unknown (22%)<br>Non-combat (25%) | Retrospective.<br>Military Trauma Registry                      | Injuries and mortality |
| Dua et al (2013)(36)              | 2006-2008         | Iraq                                            | Military | 25          | Paediatric (100%)               | IEDs/Shelling (72%)<br>GSW (28%)                                            | Retrospective.<br>Military Trauma Registry                      | Injuries and mortality |
| Edwards et al (2012)(37)          | 2002-2012         | Afghanistan<br>Iraq                             | Military | 4913        | Paediatric (100%)               | IEDs/Shelling (100%)                                                        | Retrospective.<br>Military Trauma Registry                      | Injuries and mortality |

|                                    |           |                        |          |        |                                 |                                                                                   |                                                                |                                            |
|------------------------------------|-----------|------------------------|----------|--------|---------------------------------|-----------------------------------------------------------------------------------|----------------------------------------------------------------|--------------------------------------------|
| Edwards et al (2014)(38)           | 2002-2012 | Afghanistan Iraq       | Military | 6273   | Paediatric (100%)               | IEDs/Shelling (23%)<br>GSW (16%)<br>Other/Unknown (4%)<br>Non-Combat (57%)        | Retrospective. Military Trauma Registry                        | Injuries and mortality                     |
| Edwards et al (2014)(39)           | 2002-2010 | Afghanistan Iraq       | Military | 4928   | Paediatric (100%)               | IEDs/Shelling (100%)                                                              | Retrospective. Military Trauma Registry                        | Injuries and mortality                     |
| Er et al (2017)(40)                | 2013-2014 | Syria                  | Civilian | 1591   | Paediatric (18%)<br>Adult (82%) | IEDs/Shelling (77%)<br>GSW (7%)<br>Other/Unknown (16%)                            | Retrospective. Single-centre Hospital based case series        | Injuries and Mortality                     |
| Fares et al (2013)(41)             | 2006-2011 | Lebanon                | Civilian | 122    | Paediatric (100%)               | UXO (100%)                                                                        | Retrospective. Single centre Hospital based case series        | Long term sequelae                         |
| Fares et al (2014)(42)             | 2006-2013 | Lebanon                | Civilian | 29     | Paediatric (28%)<br>Adult (72%) | UXO (100%)                                                                        | Retrospective. Single centre Hospital based case series        | Injuries and mortality                     |
| Gataa et al (2011)(43)             | 2005-2006 | Iraq                   | Civilian | 551    | Paediatric (20%)<br>Adult (80%) | IEDs (82%)<br>GSW (18%)                                                           | Retrospective. Multi-centre Hospital based case series         | Injuries and mortality                     |
| Guerrero et al (2014)(44)          | 2013      | USA                    | Civilian | 11     | Paediatric (100%)               | IEDs (100%)                                                                       | Prospective. Community Surveillance                            | Long term sequelae                         |
| Guha-Sapir et al (2015)(45)        | 2011-2014 | Syria                  | Civilian | 78769  | Paediatric (16%)<br>Adult (84%) | IEDs/Shelling (75%)<br>GSW (25%)                                                  | Grey-literature                                                | Mortality                                  |
| Guha-Sapir et al (2018)(46)        | 2011-2016 | Syria                  | Civilian | 101453 | Paediatric (17%)<br>Adult (83%) | Shelling/Air bombardment (57%)<br>Other/Not specified (43%)                       | Retrospective. Community Surveillance                          | Mortality                                  |
| Gurney et al (2004)(47)            | 2003      | Iraq                   | Military | 78     | Paediatric (100%)               | IEDs/Shelling (7%)<br>GSW (1%)<br>Other/Not specified (9%)<br>Non-Conflict (83%)  | Retrospective. Single-centre Hospital based case series        | Injuries and mortality                     |
| Hanevik et al (2000)(48)           | 1991-1995 | Eritrea                | Civilian | 248    | Paediatric (63%)<br>Adult (37%) | Landmines (100%)                                                                  | Retrospective. Multi-centre Hospital based case series         | Injuries and mortality                     |
| Harris et al (2009)(5)             | 2008      | Afghanistan            | Military | 15     | Paediatric (100%)               | IEDs/Shelling (87%)<br>Other/Not specified (6%)<br>Non-conflict (7%)              | Retrospective. Single-centre Hospital based case series        | Injuries and mortality                     |
| Hemmati et al (2015)(49)           | 1988-2013 | Iran                   | Civilian | 78     | Paediatric (100%)               | Landmines (100%)                                                                  | Cross-section. Community surveillance                          | Long term sequelae                         |
| Hillman et al (2016)(50)           | 2003-2014 | Afghanistan Iraq       | Military | 27     | Paediatric (100%)               | IEDs /Shelling (59%)<br>GSW (26%)<br>Non-combat (15%)                             | Retrospective. Military Trauma Registry                        | Injuries and mortality                     |
| Hinsley et al (2005)(51)           | 2003      | Iraq                   | Military | 79     | Paediatric (10%)<br>Adult (90%) | IEDs/Shelling (63%)<br>GSW (37%)                                                  | Retrospective Single-centre Hospital based case series         | Injuries and mortality                     |
| Hodalic et al (1999)(52)           | 1991-1992 | Croatia                | Military | 1211   | Paediatric (13%)<br>Adult (87%) | IEDs/Shelling (95%)<br>GSW (3%)<br>Other/Not specified (2%)                       | Retrospective. Single-centre Hospital based case series        | Injuries and mortality                     |
| Inwald et al (2014)(53)            | 2011-2012 | Afghanistan            | Military | 112    | Paediatric (100%)               | IEDs/Shelling (54%)<br>GSW (29%)<br>Non-conflict (17%)                            | Retrospective Single-centre Hospital based case series         | Injuries and mortality                     |
| Jaffe et al (2010)(54)             | 2000-2005 | Israel                 | Civilian | 837    | Paediatric (14%)<br>Adult (86%) | IEDs (100%)                                                                       | Retrospective. National Trauma Registry                        | Injuries and mortality                     |
| Jeevaratnam et al (2013)(55)       | 2010      | Afghanistan            | Military | 88     | Paediatric (35%)<br>Adult (65%) | IEDs/Shelling (33%)<br>Non-conflict (67%)                                         | Retrospective Single-centre Hospital based case series         | Injuries and mortality                     |
| Khan et al (2015)(56)              | 2010-2011 | Pakistan               | Civilian | 103    | Paediatric (16%)<br>Adult (84%) | IEDs (100%)                                                                       | Retrospective National Trauma Registry                         | Injuries and mortality                     |
| Kinra et al (2003)(57)             | 1991-2000 | Bosnia and Herzegovina | Civilian | 4064   | Paediatric (14%)<br>Adult (86%) | Landmines (100%)                                                                  | Retrospective. Community Surveillance                          | Injuries and mortality                     |
| Klimo et al (2010)(58)             | 2007-2009 | Afghanistan            | Military | 43     | Paediatric (100%)               | IEDs/Shelling (67%)<br>GSW (5%)<br>Non-combat )28%)                               | Retrospective. Single-centre Hospital based case series        | Injuries and mortality                     |
| Kluger et al (2004)(59)            | 2000-2003 | Israel                 | Civilian | 906    | Paediatric (7%)<br>Adult (93%)  | IEDs (100%)                                                                       | Retrospective. National Trauma Registry                        | Injuries and mortality                     |
| Matos et al (2008)(60)             | 2003-2004 | Iraq                   | Military | 1132   | Paediatric (3%)<br>Adult (97%)  | IEDs/Shelling (64%)<br>Non-combat (36%)                                           | Retrospective. Single-centre Hospital based case series        | Injuries and mortality                     |
| McGuigan et al (2007)(61)          | 2004      | Iraq                   | Military | 99     | Paediatric (100%)               | GSW (42%)<br>IEDs/Shelling (35%)<br>Other/Not specified (23%)                     | Retrospective. Single-centre Hospital based case series        | Injuries and mortality                     |
| McKechnie et al (2014)(62)         | 2008-2012 | Afghanistan            | Military | 766    | Paediatric (100%)               | IEDs/Shelling (51%)<br>GSW (28%)<br>Non-combat (21%)                              | Retrospective. Military Trauma Registry                        | Injuries and mortality                     |
| Mirza et al (2013)(63)             | 2007-2011 | Pakistan               | Civilian | 1142   | Paediatric (6%)<br>Adult (94%)  | IEDs (100%)                                                                       | Retrospective Multi-centre Hospital based mortuary case series | Injuries and mortality                     |
| Mousavi et al (2015)(64)           | 2014      | Iran                   | Civilian | 78     | Paediatric (100%)               | Landmines (80%)<br>UXO (20%)                                                      | Retrospective. Mixed-method community surveillance             | Long-term sequelae/ Injuries and mortality |
| Naylor et al (2018)(65)            | 2007-2016 | Afghanistan Iraq       | Military | 3439   | Paediatric (100%)               | IEDs/Shelling (38%)<br>GSW (20%)<br>Non-combat (11%)<br>Other/Not specified (31%) | Retrospective. Military Trauma Registry                        | Injuries and mortality                     |
| Neff et al (2014)(66)              | 2001-2013 | Afghanistan Iraq       | Military | 1113   | Paediatric (100%)               | IEDs/Shelling (56%)<br>GSW (32%)<br>Non-combat (12%)                              | Retrospective. Military Trauma Registry                        | Injuries and mortality                     |
| Nordmann et al (2010)(67)          | 2008-2009 | Afghanistan            | Military | 31     | Paediatric (100%)               | IEDs/Shelling (45%)<br>GSW (32%)<br>Non-combat (23%)                              | Retrospective. Single-centre Hospital based case series        | Injuries and mortality                     |
| Pannell et al (2015)(68)           | 2010-2011 | Afghanistan            | Military | 263    | Paediatric (100%)               | IEDs/Shelling (42%)<br>GSW (17%)<br>Non-combat (41%)                              | Retrospective. Single-centre Hospital based case series        | Injuries and mortality                     |
| Pat-Horenczyk et al (2007)(69)     | 2006      | Israel                 | Civilian | 695    | Paediatric (100%)               | IEDs (100%)                                                                       | Retrospective. Mixed-method community surveillance             | Long term sequelae                         |
| Patregnani et al (2012)(70)        | 2002-2009 | Afghanistan Iraq       | Military | 744    | Paediatric (100%)               | IEDs/Shelling (43%)<br>GSW (26%)<br>Non-combat (31%)                              | Retrospective. Military Trauma Registry                        | Injuries and mortality                     |
| Pearce et al (2015)(71)            | 2011-2012 | Afghanistan            | Military | 281    | Paediatric (100%)               | IEDs/Shelling (47%)<br>GSW (13%)<br>Non-combat (35%)                              | Retrospective. Single-centre Hospital based case series        | Injuries and mortality                     |
| Poor Zamany Nejat et al (2016)(72) | 2015      | Iran                   | Civilian | 41     | Paediatric (100%)               | Landmines (100%)                                                                  | Retrospective mixed-method community surveillance              | Long term sequelae                         |
| Quintana et al (1997)(73)          | 1996      | USA                    | Civilian | 66     | Paediatric (100%)               | IED (100%)                                                                        | Retrospective. National Trauma Registry                        | Injuries and mortality                     |
| Schauer et al (2018)(74)           | 2007-2016 | Afghanistan Iraq       | Military | 3388   | Paediatric (100%)               | IEDs/Shelling (43%)<br>GSW (22%)<br>Non-combat (35%)                              | Retrospective. Military Trauma Registry                        | Injuries and mortality                     |

|                             |           |                     |          |      |                                |                                                              |                                                            |                           |
|-----------------------------|-----------|---------------------|----------|------|--------------------------------|--------------------------------------------------------------|------------------------------------------------------------|---------------------------|
| Smith et al (2014)(75)      | 2003-2011 | Afghanistan<br>Iraq | Military | 813  | Paediatric (6%)<br>Adult (94%) | IEDs/Shelling (77%)<br>GSW (23%)                             | Retrospective.<br>Military Trauma Registry                 | Injuries and<br>mortality |
| Spinella et al 2008(76)     | 2001-2007 | Afghanistan<br>Iraq | Military | 1305 | Paediatric (100%)              | Trauma (Unspecified) (100%)                                  | Retrospective. Multi-centre Hospital<br>based case series  | Injuries and<br>mortality |
| Terzic et al (2001)(77)     | 1991-1995 | Bosnia<br>Croatia   | Civilian | 92   | Paediatric (100%)              | IEDs/Shelling/UXO (100%)                                     | Retrospective. Single-centre Hospital<br>based case series | Injuries and<br>mortality |
| Thompson et al (2017)(78)   | 2006-2013 | Afghanistan         | Military | 295  | Paediatric (100%)              | IED (68%)<br>UXO (4%)<br>Other/Not specified (28%)           | Retrospective. Single-centre Hospital<br>based case series | Injuries and<br>mortality |
| Villamaria et al (2014)(79) | 2002-2011 | Afghanistan<br>Iraq | Military | 155  | Paediatric (100%)              | IEDs/Shelling (58%)<br>GSW (37%)<br>Other/Not specified (5%) | Retrospective.<br>Military Trauma Registry                 | Injuries and<br>mortality |
| Waisman et al (2003)(80)    | 2000-2002 | Israel              | Civilian | 160  | Paediatric (100%)              | IEDs (67%)<br>GSW (25%)<br>Other/Not specified (11%)         | Retrospective.<br>National Trauma Registry                 | Injuries and<br>mortality |
| Walker et al (2010)(81)     | 2006-2007 | Afghanistan         | Military | 78   | Paediatric (100%)              | IEDs/Shelling (64%)<br>GSW (37%)<br>Other/Not specified (5%) | Retrospective. Single-centre Hospital<br>based case series | Injuries and<br>mortality |
| Wilson et al (2013)(82)     | 2010-2011 | Afghanistan         | Military | 41   | Paediatric (100%)              | IEDs/Shelling (47%)<br>GSW (12%)<br>Non-combat (42%)         | Retrospective. Single-centre Hospital<br>based case series | Injuries and<br>mortality |
| Woods et al (2012)(83)      | 2003-2009 | Afghanistan<br>Iraq | Military | 176  | Paediatric (100%)              | IEDs/Shelling (59%)<br>GSW (21%)<br>Non-combat (20%)         | Retrospective.<br>Military Trauma Registry                 | Injuries and<br>mortality |

### 3.1 Demographics

Following the use of explosive weaponry by non-state actors against civilians, the most commonly injured paediatric cohort are males aged 10-18 years old(9,12,80), while children involved in conflict and ERW blast injuries were generally aged between 4-10 years old(37,81). Perpetrators target busy areas such as restaurants and nightclubs which older children and adolescents might frequent (10,12,80), while cultural factors within LMICs in these social areas result in a predominantly male cohort (9,10,25,44,54,56,59,63,69,80). Similar gender finding are observed in children following conflict and ERW related injuries where all studies showed male predominance in victims, with over 70% male in three quarters of the studies (Figure 1).

(Figure 1. Gender differences in in casualties following blast)

ERW contribute considerable morbidity and mortality both during and following conflict. As seen in figure 2, children were more likely to be injured by UXO compared with adults, while landmines affected a predominately adult cohort (11,13,16,18,20,22,23,31,57).

(Figure 2. Percentage of Casualties (injuries and fatalities) by specific modalities)

UXOs have been described as small, colourful and toy-like, promoting child interaction and subsequent injury from handling, resulting in often fatal upper limb, head, neck or chest injury(18,31,41,84,85). Due to the social nature of children, these interactions commonly occur in groups, leading to multiple casualties in 45-63% of events involving children compared to 30-40% in adults(20,57,64).

Occupation and education play a role in ERW injuries. It is common for children in LMICs, particularly males, to assist their family with herding and farming as opposed to attending school. This may affect the likelihood to exposure to ERWs through increased freedom to roam where such devices are present(25,42,64,72). A lack of formal education impacts the

1  
2  
3 child's ability to read warning signs; only 6-22% of victims were aware ERWs were  
4 present(27,80) and of these, only 0-11% had received ERW risk education(23,25,27,80).  
5  
6

7 Children are particularly vulnerable to wide-area explosives such as aerial bombardment and  
8 shelling, particularly in the primarily urbanised environments of modern conflicts. In the Syrian  
9 Civil War, three quarters of wide-area explosives were used in civilian residential areas that  
10 children frequent, with these mechanisms responsible for 82% of child deaths(45,46).  
11  
12  
13

14 The following section reviews what is known of mortality in children before reviewing injury  
15 types.  
16  
17

### 18 19 **3.2 Mortality** 20 21

22 Comparison of paediatric wartime mortality data is difficult as many studies do not differentiate  
23 mechanism of injury. Edwards et al(86) study on 4,913 children between 2002-2010  
24 presenting with blast injuries remains the single largest data set. The reported mortality rate  
25 of 8% matches well with the mortality rates of 6-9% quoted in paediatric trauma deaths from  
26 Iraq and Afghanistan, although these studies displayed all trauma mechanisms as opposed to  
27 specifying blast trauma(15,27,30,35,39,62). Between 2006-2013, Thompson et al. (78) noted  
28 a mortality rate over double of that quoted by Edwards et al. following paediatric blast injury  
29 in Afghanistan (18%). Operational tempo and the increasing use of IEDs have been  
30 hypothesized to underlie these discrepancies in mortality(78).  
31  
32  
33  
34  
35  
36

37 Age related variation in mortality has been described. Matos et al noted mortality was highest  
38 at 24% in young children (5-8 year old)(60) while Schauer et al and Spinella et al found  
39 greatest mortality in 0-4 years(74,76). Similarly, Borgman et al and Matos et al noted that  
40 children <8 years old had increased trauma mortality compared to 8-16 year olds (10-18% vs  
41 4-7%)(28,60), while Spinella et al noted a similar increase in mortality in young children (<6  
42 year old) compared to 6-16 year olds (11% vs 4%)(76). Few studies directly compare adult  
43 and paediatric mortality, and comparisons between studies are difficult due to methodological  
44 differences. What is common is that mortality in children following combat related trauma is  
45 considerably higher than that of paediatric non-combat trauma (2-3%)(87) and adult military  
46 combat casualties (1-3%)(88,89).  
47  
48  
49  
50  
51  
52  
53

54 A wide range of paediatric mortality is reported following mine strikes, ranging from 4-  
55 46%(13,18,20-24,31,41,84). Shuker et al(90) suggested that approximately half of paediatric  
56 victims die within minutes of mine explosion, likely due to lacerations to the head, major blood  
57 vessels or vital organs causing non-survivable injuries, in keeping with adult literature(88,89).  
58  
59  
60

1  
2  
3 Time critical injuries following blasts may represent particular problems in LMIC's, where pre-  
4 hospital evacuation chains may be protracted. Coupland(91) noted that in 1991, only 14% of  
5 paediatric and adult ERW victims were admitted in under six hours, while the majority (58%)  
6 were admitted between 6-24 hours and 28% presented after 24 hours. Even in recent conflicts,  
7 Bitterman et al(26) found <10% of children presented within 1 hour, with over a third presenting  
8 after 6 hours. Protracted evacuation of paediatric victims add to blast mortality, reinforced by  
9 studies observing a 85-91% mortality of children either at scene or en-route to health  
10 facilities(23,90).  
11  
12  
13  
14  
15  
16

### 17 **3.3 Injury types and mortality**

#### 18 **3.3.1 Vascular damage**

19  
20 Penetrating injuries occur in 38-76% of blast-exposed children (9,10,15,16,27,35,68,80), with  
21 incidence greater in older children aged 10-16 compared to 0-10 year olds (65-83% vs 47-  
22 63%)(54,60). In keeping with penetrating injury patterns, vascular injury was observed in 3-  
23 12% of children following blast trauma (9,16,79,80), considerably higher compared to non-  
24 blast conflict trauma where vascular injury occurred in 0.6-1% of paediatric  
25 victims(9,10,59,61,79).  
26  
27  
28  
29  
30  
31

32 Vascular damage and subsequent haemorrhage following explosions have been identified as  
33 a significant cause of childhood fatalities, ranging from the primary cause of death in 21-38%  
34 during the Syrian Civil War(32,33) to 63% following IED and suicide attacks in Pakistan(63),  
35 while mortality rates following penetrating injuries in civilian settings are considerably lower  
36 (5%)(79). Extremity trauma was most highly associated with vascular injuries, with the majority  
37 of vascular injuries occurring in the lower limb (38-58%) followed by the upper limbs (25-  
38 28%)(36,79). This is in keeping with adult data where 54% of injuries were sustained to the  
39 extremities(88). Despite its high prevalence, extremity vascular wounds confer reduced risk of  
40 death compared to vascular damage within the torso, attributed as the primary cause of death  
41 in 71% of paediatric deaths and conferring a four-fold increased risk of death compared to  
42 extremity vascular injuries(79).  
43  
44  
45  
46  
47  
48  
49

50 Data on vascular damage is clear: older children and adolescents sustain similar rates of  
51 vascular injury to adults, particularly to the extremities, while mortality following penetrating  
52 trauma is primarily the result of injuries to the vasculature within the torso.  
53  
54  
55  
56

#### 57 **3.3.2 Head injury**

1  
2  
3 The prevalence of head injuries following blasts are diverse, ranging from 6-54%  
4 (10,12,15,17,19,26,30,34,35,37,40,51–53,61,79,80), while adult combat data ranges from 16-  
5 29%(88). This variation is due to the heterogenous definitions of head injury described in these  
6 studies, with few studies differentiating between superficial scalp wounds, blunt traumatic  
7 brain injury (TBI) or penetrating TBI. Where head injuries were documented, TBI was recorded  
8 in 21-62% of paediatric victims, of which 38-39% were defined as penetrating(42,52,80).  
9 Unsurprisingly, papers noted over double the incidence of paediatric penetrating head injury  
10 in blast trauma compared to mainly blunt civilian trauma (13% vs 6%), while the reverse was  
11 true in closed head injuries, with half the incidence of closed head injuries in blast injuries  
12 compared to civilian trauma (22% vs 44%)(9).

13  
14  
15  
16  
17  
18  
19  
20 Cerebral haemorrhage and direct cranial damage following blast have been attributed as a  
21 leading cause of death in children, responsible for 46-71% of fatalities (36–38,43,101).  
22 Creamer(38) noted penetrating wounds to the head accounted for 44% of child deaths in the  
23 emergency department while open skull fractures with cerebral evisceration was documented  
24 in 88% of paediatric fatalities following the 1995 Oklahoma City bombings(102). While  
25 penetrating head injuries undoubtedly carry high mortality, Woods(83) noted that 8 children  
26 survived to hospital discharge despite penetrating head injuries deemed initially unsurvivable,  
27 suggesting such are not unequivocally fatal.

28  
29  
30  
31  
32  
33 Er et al(40) noted that children were more likely to be injured in the head compared to adults  
34 (54% vs 40%) following aerial and shelling during the Syrian Civil War, while young children  
35 aged between 0-4 year old were more likely to undergo neurosurgical procedures compared  
36 to other ages(39,58), 48% of which were craniectomies or craniotomies for penetrating brain  
37 injury, mainly secondary to IED blasts(58). Suggested reasons for this increase may relate to  
38 anatomical predispositions, particularly in infants, such as large head to body ratios in addition  
39 to reduced skull rigidity(54) as well as the relatively shorter distance from the head to ground-  
40 based ERW and IEDs compared to adults(18,37,54,85,90).

41  
42  
43  
44  
45  
46  
47 There is a clear lack of studies investigating long term outcomes following blast- associated  
48 head injuries. While significant cognitive, intellectual and functional sequelae arising from non-  
49 blast TBI (nbTBI) have been described, controversy exists as to whether nbTBI is analogous  
50 to blast-induced TBI(92), and the paucity of paediatric data means this comparison is even  
51 more problematic.

52  
53  
54  
55  
56 A unifying message is that head injuries are associated with high morbidity and mortality in  
57 paediatric blast trauma, while the long term consequences remain largely unknown. Head  
58 injuries are commonly penetrating compared to civilian practice, and increased operative  
59  
60

1  
2  
3 demand in infants and toddlers for neurosurgical procedures may stretch medical service  
4 expertise.  
5  
6

### 7 8 **3.3.3 Facial and ocular injuries** 9

10 Blasts result in injury to the face in between 27-48% of paediatric victims, compared to 12%  
11 resulting from GSW(12,37,53) and 10% in adults(88). Relative to other blast related injuries,  
12 facial injuries in isolation are associated with reduced mortality(37). However, Gataa (43)  
13 noted that of the patients presenting with facial injuries, 29% had concomitant eye injury, 22%  
14 had TBI, while life-threatening facial bleeding occurred in 10% of patients. In addition to  
15 physical sequelae, facial injuries are associated with functional and psychological disorders  
16 stemming from stigmatisation of disfiguring injuries with implications for future social,  
17 economic and marital prospects(43).  
18  
19

20 Despite only comprising of 0.3% of the anterior body surface, the eye is sensitive to blast  
21 injury, with ocular injuries in 4-28% of children following trauma related to combat or ERW  
22 (15,17,19,26,34,35,42,61,64). In keeping with patterns of facial injury, an increased  
23 prevalence of eye injury is associated with blast injuries compared to GSW (13% vs 3%)(12).  
24 Landmines are often associated with multiple foreign bodies on the conjunctiva, cornea and  
25 sclera, in addition to sight-threatening injuries such as enucleation or eye globe  
26 perforation(31). Monocular enucleation was observed in 4%, while bilateral enucleation, and  
27 hence blindness, was more common (14%)(31,64). When compared to adult victims of  
28 landmines and cluster bombs, children have more eye injuries (14% vs 8%)(57) as well as  
29 twice the prevalence of eye globe perforation (28% vs 14%)(40) and complete loss of vision  
30 (21 vs 10%)(18). Without adequate support, both monocular and bilateral vision loss may  
31 translate to developmental and educational deficiencies in the growing child.  
32  
33

34 Facial and eye injuries are frequent following exposure to blasts, and should raise suspicion  
35 of intracranial injury. Important are the social and education implications of these disfiguring  
36 injuries in the growing child.  
37  
38

### 39 40 **3.3.4 Torso Injuries** 41

42 Following blast injury, trauma to the torso is common, varying from 12-46% between studies  
43 (12,15,17,19,26,30,31,35-37,40,51-53,63,79) and peaking in 5-10 year olds(54,80). Er et  
44 al.'s (40) study on civilian paediatric injuries during the Syrian Civil War noted that the  
45 abdomen was less commonly injured compared to adults (12 vs 20%), while chest injury with  
46 accompanying lung contusion was present in 51% of children with torso injuries, compared to  
47  
48  
49  
50  
51  
52  
53  
54  
55  
56  
57  
58  
59  
60

1  
2  
3 35% in adults. Both chest and abdominal injuries from blast are typically classed as  
4 'severe'(37). Abdominal injuries accounted for 18-19% of injury specific deaths following blast  
5 in the paediatric population, while chest injuries have been attributed to 8% of deaths in the  
6 ED(35). Explanations for this susceptibility to severe and life threatening torso injuries include  
7 a lack of body armour compared to adult combat victims and the observation that children  
8 have flexible rib cages allowing greater damage to underlying structures without rib fracture,  
9 contributing to the increase in lung contusion observed(79).

10  
11  
12  
13  
14  
15 When organ specific injuries were examined, blast was most likely to cause open penetrating  
16 wounds of the bowel and intra-abdominal organs, affecting the small intestine in over a third  
17 (34%) and the liver, spleen or pancreas in 36%(14,35,67). Where internal organ damage was  
18 sustained, injury specific mortality almost doubled from 15 to 29%(32). These injuries were  
19 frequently contaminated due to bowel rupture, requiring multiple procedures and a high rate  
20 of antibiotic usage(77). The thinner abdominal walls, reduced intraabdominal fat and larger  
21 solid organs relative to the body cavity increases likelihood of visceral damage following  
22 penetrating trauma, while delayed signs of visceral damage support the role of repeated  
23 examination and radiological input, even in the absence of external damage.

24  
25  
26  
27  
28  
29  
30 In the context of total operative procedures performed, laparotomies comprised a significant  
31 component of total surgical workload, encompassing 12-23% of all paediatric procedures  
32 performed(62,78,93). Children were more likely to require laparotomies following combat  
33 trauma compared to paediatric non-combat, and primarily blunt, abdominal trauma (13 vs 2%).  
34 Children in combat zones were also twice as likely to undergo laparotomies compared to US  
35 service personnel (12% vs 6%)(76). In addition to the high prevalence of abdominal injuries,  
36 children frequently swallow air when frightened or in pain, resulting in gastric dilation. As well  
37 as increasing vomiting risk, this may erroneously suggest abdominal injury(90) and lead to  
38 laparotomy. Despite this, Arafat et al(14) noted that only 8% of laparotomies were negative,  
39 supporting the role of explorative laparotomies in penetrating trauma following blasts.

40  
41  
42  
43  
44  
45  
46  
47 Compared to both adults and children in non-conflict settings, the blast injured child is more  
48 likely to sustain injuries to the chest. While abdominal injuries are less frequent, they are more  
49 likely to involve visceral damage and require operative management compared to adult  
50 combat trauma.

### 51 52 53 54 55 **3.3.5 Extremity injury**

56  
57  
58  
59  
60  
Extremity injury is one of the defining features following blast related trauma. Extremity injuries  
within conflict zones are observed in just under half of children (45%), its prevalence



1  
2  
3 increasing in blast injuries (69%)(53), with a retrospective study finding 100% of traumatic  
4 amputations and 96% of bone injuries to hand and foot were secondary to blast injuries(19).  
5  
6

7 Studies describe extreme variation in the prevalence of upper limb injuries following blasts,  
8 ranging from 6-74% (11,13,15–17,19,26,30,31,51,52,62,63,73,78–80), with the greatest  
9 upper limb injury reported following UXO and cluster munition strike(31,41). Compared to adult  
10 and particularly following ERW blast, children were more likely to sustain upper limb injuries  
11 (18,20–23,63) with a corresponding increase of 150-300% requiring operative amputation,  
12 typically at the level of the finger (16,21,22,48). Traumatic amputation of the upper limb was  
13 common and limited to the hands in 44-94% of children sustaining upper limb injuries(17,31),  
14 while trans-radial and trans-humeral amputation was less frequent (14-34%)(52,62) but were  
15 more likely to be bilateral(64). Arm fractures necessitating surgical fixation were observed in  
16 45%(73), while upper limb vasculature was commonly disrupted(36,52,79).  
17  
18  
19  
20  
21  
22  
23

24 Similarly, prevalence of lower limb injuries shows variation between studies on blast affecting  
25 25-86% of children(11,15–17,26,30,31,51,52,62,63,73), with landmine strikes particularly  
26 associated with lower limb injury(11,16,31); 20-29% required operative amputations, normally  
27 at the trans-tibial plane(16,17,64). Lower limb injuries were less common in children compared  
28 to adults(18,20,22–24), with incidence lowest in 0-3 year olds(54), while increasing in  
29 adolescents to mirror adults(18). Traumatic amputations were less frequent compared to the  
30 upper limb, occurring in 14-35% of lower limb injuries(31,52,62).  
31  
32  
33  
34  
35

36 Landmines drive debris, footwear and clothing upward between planes of the soft tissues and  
37 bone, leading to degloving injuries of the leg, perineum and lower abdominal viscera, as well  
38 creating serious potential for soft tissue and bone infection in the remaining limb(85,91). While  
39 large bony defects of the lower limb are problematic in children(94), reconstruction with limited  
40 shortening (<2 cm) has been associated with good outcomes, with the capability for highly  
41 active growth plates to remodel and compensate for this (19,95). However, 75% of new growth  
42 occurs in the distal femur and tibia growth plates, with the distal limb most prone to explosive  
43 disruption(85).  
44  
45  
46  
47  
48  
49

50 The long term physical, psychosocial and financial repercussions of amputation must not be  
51 underestimated. Physical complications are greatest following TA and below knee  
52 amputations, and include anterior and varus bowing, heterotopic ossification and osseous  
53 overgrowth requiring operative or prosthetic revision(96). Overgrowth is particularly  
54 problematic in younger patients (under 12 years), with 15% of patients sustaining amputations  
55 requiring re-vision of their stump. Protracted phantom limb sensation (PLS) and phantom limb  
56 pain (PLP) is reported in over 50% of children following blast related amputation, similar to  
57  
58  
59  
60

1  
2  
3 that seen in adult literature following blasts(97), yet over five times higher than in children  
4 requiring amputation following non-traumatic indications such as malignancy. Increased PLS  
5 has been reported in lower limb amputations, while PLP was increased in upper limb  
6 amputations (22,100). Social acceptance of the child amputee is culturally specific, with  
7 stigmatisation in certain cultures negatively impacting the child's psychological, social and  
8 educational status(98). While there is a paucity of outcome and long term costing studies in  
9 LMICs, the financial burden of prolonged rehabilitation and repeated revision of prosthesis on  
10 the children and host country's health system is likely to be considerable(98).

11  
12  
13  
14  
15  
16  
17 Like adults involved in blast trauma, older and adolescents children are prone to extremity  
18 injury, particularly of the upper limb, while infants and toddlers experience less extremity  
19 injuries. Limb injury causes diverse complications in the growing child with increased  
20 requirement for re-revision compared to adults.  
21  
22

### 23 24 25 **3.3.6 Burn injuries**

26  
27 Multiple retrospective studies have noted that the majority of burns in children result from  
28 civilian mechanisms such as scalding, open fires and flash burns from household cooking  
29 fuels (28,35,47,99,100), while approximately 9-12% is the result of high-order explosives  
30 observed in combat blast modalities(47,100), less than observed in adult combat populations  
31 (52%)(101). Unlike civilian mechanisms however, blast-induced burns rarely occur in isolation,  
32 with multidimensional injuries playing a significant role in the child's prognosis(55,80,100).  
33 While post-mortem findings following the Syrian Civil War attributed only 0.5% of deaths being  
34 secondary to burns(32), conflict-related burn victims had higher mortality compared to non-  
35 conflict related burn victims (47% vs 3%)(99), and significantly greater than blast related burns  
36 in adult military populations (5%)(101). Severe burns following blasts were sustained in 30%  
37 of children, and fatal in 36-40%(30,37).  
38  
39

40  
41  
42  
43  
44  
45  
46 Creamer(38) noted the median age of burn victims as 6 years old. At this young age, the  
47 anatomical disproportionality of the child increases the total body surface area (TBSA),  
48 resulting in significant burn surface area (BuSA). Thus, approximately half of paediatric burns  
49 in conflict zones result in BuSA >15% (32,127), while 13% of children have BuSA exceeding  
50 40%(127). A high BuSA exceeding 40% has been linked to myocardial damage and  
51 hypotension, making hemodynamic management challenging, while complications including  
52 nosocomial infection of the burn eschar and pneumonia are not uncommon(99). Within LMICs,  
53 protein loss and weight based fluid resuscitation is complicated by malnourishment, while cold  
54 fluids may accentuate hypothermia(47).  
55  
56  
57  
58  
59  
60

1  
2  
3 In conflict related burns, the head and neck are most frequently affected, potentially leading  
4 to thermal inhalation injuries(55,100). Thermal inhalation injuries in paediatric victims are  
5 difficult to assess, and clues to inhalational injuries such as increased respiratory rate may be  
6 incorrectly interpreted in the context of physiological age discrepancies. In addition the  
7 paediatric subglottis represents the narrowest section of the upper airway, and deteriorates  
8 rapidly from burn-induced laryngeal oedema, especially in the context of failed intubation  
9 attempts(102) leading to rapid oxygen desaturation. Between 21-33% of children were  
10 identified as having inhalational injuries requiring pre-emptive or immediate intubation to  
11 protect the airways(55,61), similar to that seen in adult combat casualties (26%)(101). Of this  
12 paediatric cohort with inhalational injuries, 39% died(55), significantly greater than in adult  
13 populations (4%)(101).

21 Prognosticating factors noted for burns include increased time to presentation, prolonged  
22 hospital length of stay and requirement for critical care input(99). This relates to the resource-  
23 intensive management of the paediatric burns patient. Like adults, hospital length of stay for  
24 burns patients are 2-3 times that of the general paediatric population(15,100), while ICU  
25 requirements are increased, particularly in burns secondary to blast injuries(99,100).  
26 Operative demands of paediatric burn victims are significant. Children aged 6 months to 3  
27 years were between 4-14 times more likely than adults to require surgical input , reflecting the  
28 significant burden of burns (39% of this cohort compared to 2-6% in adults(103)). While other  
29 conditions may be treated by a single operation, burns often require serial procedures(103),  
30 with an average 2 operations per patient. This creates a disproportionate operative volume in  
31 both adults and paediatric patients compared to other surgical emergencies(103). Burns  
32 induced by blast injuries require more escharotomies (27% vs 4%  $P<0.001$ ) and fasciotomies  
33 (67% vs 30%  $P=0.002$ ) when compared to civilian burn mechanisms(99).

43 Additionally, the requirement for post-operative support and rehabilitation add to the resource  
44 requirements. Children are rarely left without functional sequelae, with limited joint mobility  
45 and impaired tactile sensation presenting significant future challenges for rehabilitation(104),  
46 while high rates of psychological morbidity including suicidal ideation have been reported in  
47 adolescents(105). Under-resourcing psychological and functional rehabilitation will likely lead  
48 to high rates of morbidity and mortality(103). The degree to which these services are available  
49 within conflict zones and LMICs is uncertain. Ethical questions naturally arise when performing  
50 interventions where health systems are unlikely to address a child's long term needs.  
51 Examination of existing paediatric burn services within zones of interest and longer term follow  
52 up of paediatric blast burn patients are required to determine the problems and needs for this  
53 cohort.  
54  
55  
56  
57  
58  
59  
60

### 3.4 Service provision

Relative to total admissions, paediatric victims affected by blasts constitute a disproportionately large resource burden on operative workload, as well as intensive care and hospital beds. Approximately 47-82% of paediatric blast victims require surgery(14,15,54,78,80), particularly adolescents(54). The requirement for multiple operative procedures were common in the paediatric cohort, especially in burn and orthopaedic surgery due to the requirement for surgical revision (34-80% of children required  $\geq 2$  procedures(15,17,19,30,34,35,37,67); 25% required  $\geq 4$  procedures)(35). Operative requirement was greatest in 9-14 year olds, requiring on average 5 procedures per patient, prolonged ICU and hospital stay, while 0-3 year olds required the least operative management(39). This study suggested the reduced requirement for operative input in 0-3 year olds may be due not only to the reduced burden of extremity injuries requiring repeated debridement, but potentially because the equipment was inappropriate for this young cohort. This is supported by observations that infants and young children aged 0-10 years old with an Injury Severity Score  $\geq 15$  were 4x less likely to go to surgery compared to adults, while adolescents (11-15 years) were 2x more likely to receive operative input(54).

Multidisciplinary surgical services were required in 80% of patients, with orthopaedic, plastic, general neurosurgical, ophthalmic and vascular surgeons often working in partnership(52). Debridement and primary skin closure represented the most common procedure, in 35-100% of studies(15-17,51,62,73,76,78), in keeping with shrapnel injuries leading to multiple and frequently contaminated superficial injuries(51,73). Children are likely to do well with thorough debridement, with well perfused tissues allowing optimal healing and scar formation(19,95).

Retrospective studies of US military medical treatment facilities (MTF) in Afghanistan have found that while children comprised only 3-6% of their total admissions, this demographic required approximately double the total bed spaces (7-11%)(27,38,61), and on average 3x the length of stay (LOS) of coalition troops admitted over the same time period(27,76). Approximately 40% of paediatric admissions required a LOS exceeding 7 days, while, in half, the LOS exceeded 14 days(10,80). Spinella et al noted that while children aged 11-17 were the greatest proportion of children occupying beds, <1 year old cohort had the longest stay(76). This contrasts with other studies finding young children <8 years old had the shortest LOS, while children(8-14 years old) had the longest(27,37).

A similar burden is observed in the intensive care unit (ICU), with between 20-45% children requiring ICU admission(5,14,15,40,55,61,67,74,80), the majority following explosive or ballistic trauma. Children were often younger (0-10 years old)(54), with one recent study noting

1  
2  
3 children aged <1 year and 1-4 years most often requiring admission(53 & 66%  
4 respectively)(74). Children under 8 required a ICU LOS over twice that of children aged >8  
5 years (60). Harris et al(5) noted that despite representing only 12% of admissions, children  
6 occupied on average 35% of ICU beds, with a brief surge in numbers resulting in 100%  
7 occupancy from children, the majority requiring ventilatory and inotropic support. This  
8 specialised service was often provided by non-paediatric experts, which could result in 2  
9 healthcare providers per paediatric patient(5). Ventilatory equipment is often age specific, and  
10 although multiple examples of ingenuity and adaptation of adult equipment exist(5,67),  
11 children may overwhelm the unprepared MTF.

12  
13  
14  
15  
16  
17  
18 One of the key challenges is providing sustainable health services in the host country. MTFs  
19 may be capable of delivering exceptional paediatric care in the acute phase following blasts,  
20 but recovery from morbidity is dependent on long term rehabilitation(95) normally provided by  
21 the host country. Not only can this place exceptional strain on local health authorities, but if  
22 provisions are not available, the child is likely to undergo a protracted decline(5,95).

23  
24  
25  
26  
27  
28  
29  
30  
31  
32  
33  
34  
35  
36  
37  
38  
39  
40  
41  
42  
43  
44  
45  
46  
47  
48  
49  
50  
51  
52  
53  
54  
55  
56  
57  
58  
59  
60  
Reasons for the high rate of admission and prolonged stay may be multifactorial. Admission  
criteria for host nationals to a coalition MTF typically require threat to life, limb, or eyesight,  
with resulting prolonged stay. Interestingly however, children with mild to moderate traumata  
are three times more likely than adults to be admitted (54). This may reflect a lack of certainty  
in initial assessment of injury severity from health practitioners unaccustomed to dealing with  
children. Within conflict zones, rearwards evacuation of civilians is not always possible, and  
health interventions such as ventilatory support may not be sustainable by host countries  
without deterioration in service standards, leading to prolonged admission until the child can  
be safely moved(5).

Following up recovery is a recurring theme when exploring long term challenges of blast  
injuries in children(6). Children are a complex cohort to monitor. Geographical displacement,  
particularly in the context of a conflict, increases the likelihood of this vulnerable cohort being  
lost to follow-up. This can impact not only the child's rehabilitation and coordination with local  
health authorities, but also cause difficulty in assessing long-term functional outcomes which  
are needed to detect future health needs. Increasingly there is recognition of the need for  
formalised trauma registries accessible in the host country, assisting the follow-up of this  
vulnerable demographic(6,37,38,61).

#### 4. Summary

Compared to adults:

- Mortality due to blast injuries decreases with increasing age.
- UXO injuries are more prevalent in the child and result in higher numbers of multiple casualties per incident.
- Vascular injury due to blast is similar between older children/adolescents and adults.
- Male children are more likely than females to be injured by blast, in keeping with adult demographics.
- Children have a higher incidence of head injuries, facial injuries, eye injuries and chest injuries than adults.
- Abdominal injuries, although they occur less frequently, are more likely to require operative management.
- Upper limb injuries and amputations are more frequent; the opposite is true for lower limb injuries.
- Burns injuries are excessively severe for young children, reflecting the anatomical disproportionality of the very young, and fatalities are far higher for those with inhalation injuries.
- Children have a disproportionate requirement for both operative and non-operative service resources.

## 5. Conclusion

Apart from their focus on paediatric blast, all the papers in this review have one thing in common. Their research is based on those child patients injured by blast in conflict zones, post-conflict zones and low resource environments. Most paediatric blast injury is inflicted in these settings but is not exclusive to them. In Britain in May 2017, a bomb detonated at the Manchester Arena killing 23 people and injuring 139, most of whom were children. The attack placed a sudden and significant burden on medical services in the city, which had no experience of paediatric blast injury in the 21<sup>st</sup> century, let alone on this kind of scale.

Wherever in the world they live, and whatever the circumstances of the explosion, the social and anatomical profile of children makes them uniquely vulnerable to one of the most complex and demanding trauma conditions that any medical professional or system can treat. This paper has characterised paediatric blast as a diverse injury pattern, which must be seen as distinct from its adult equivalent. This pattern should be fully understood from point of wounding through the post-operative and rehabilitation phases of treatment. This continuum approach would enable both better long-term care of the patient, and improved support of medical systems bearing the intense burden of that care.

1  
2  
3 It remains to be seen whether the monitoring of the long term effects of paediatric blast injury  
4 in well-resourced environments is any better than that in areas of instability. Monitoring of  
5 patient outcomes should be integrated with the monitoring of treatment so that relevant  
6 practice and skills can be continually assessed. It is urgent that the understanding of  
7 paediatric blast injury is given focus and structure, not just for the likely significant patient  
8 cohort of the future but for those suffering today as blast injured children surviving into blast-  
9 blighted adulthood, wherever they live in the world.  
10  
11  
12  
13  
14  
15  
16  
17  
18  
19  
20  
21  
22  
23  
24  
25

## 26 **References**

- 27 1. Frost A, Boyle P, Autier P, King C, Zwijnenburg W, Hewitson D, et al. Articles The  
28 effect of explosive remnants of war on global public health: a systematic mixed-  
29 studies review using narrative synthesis. *Lancet Public Heal*. 2017;2(2):e286–96.  
30  
31
- 32 2. Wolf SJ, Bebarta VS, Bonnett CJ, Pons PT, Cantrill S V. Blast injuries. *Lancet*. 2009  
33 Aug;374(9687):405–15.  
34  
35
- 36 3. Champion HR, Holcomb JB, Young LA. Injuries from explosions: physics, biophysics,  
37 pathology, and required research focus. *J Trauma*. 2009;66(May):1468–1477;  
38 discussion 1477.  
39  
40
- 41 4. UNICEF. United Nations Convention on the Rights of the Child [Internet]. 1989 [cited  
42 2017 Sep 1]. Available from: [https://downloads.unicef.org.uk/wp-  
43 content/uploads/2010/05/UNCRC\\_united\\_nations\\_convention\\_on\\_the\\_rights\\_of\\_the\\_  
44 child.pdf?\\_ga=2.85767705.181858325.1504263661-1041319099.1504263661](https://downloads.unicef.org.uk/wp-content/uploads/2010/05/UNCRC_united_nations_convention_on_the_rights_of_the_child.pdf?_ga=2.85767705.181858325.1504263661-1041319099.1504263661)  
45  
46
- 47 5. Harris CC, McNicholas JJ. Paediatric intensive care in the field hospital. *J R Army*  
48 *Med Corps*. 2009;155(2):157–9.  
49  
50
- 51 6. Bull A, Mayhew E, Reavley P, Tai N, Taylor S. Comment Paediatric blast injury :  
52 challenges and priorities. *Lancet child Adolesc Heal*. 2018;4642(18):20–1.  
53  
54
- 55 7. Bree S, Wood K, Nordmann GR, Mcnicholas J. The Paediatric Transfusion Challenge  
56 on Deployed Operations. 156.  
57  
58  
59  
60

- 1
  - 2
  - 3
  - 4
  - 5
  - 6
  - 7
  - 8
  - 9
  - 10
  - 11
  - 12
  - 13
  - 14
  - 15
  - 16
  - 17
  - 18
  - 19
  - 20
  - 21
  - 22
  - 23
  - 24
  - 25
  - 26
  - 27
  - 28
  - 29
  - 30
  - 31
  - 32
  - 33
  - 34
  - 35
  - 36
  - 37
  - 38
  - 39
  - 40
  - 41
  - 42
  - 43
  - 44
  - 45
  - 46
  - 47
  - 48
  - 49
  - 50
  - 51
  - 52
  - 53
  - 54
  - 55
  - 56
  - 57
  - 58
  - 59
  - 60
8. Diana G, Msn R, Sally K, Singh T. Using System Change as a Method of Performance / Quality Improvement ... 2010;
9. Aharonson-Daniel L, Waisman Y, Dannon YL, Peleg K. Epidemiology of Terror-Related Versus Non-Terror-Related Traumatic Injury in Children. *Pediatrics*. 2003 Oct;112(4):e280–e280.
10. Aharonson-Daniel L, Klein Y, Peleg K. Suicide bombers form a new injury profile. *Ann Surg*. 2006 Dec;244(6):1018–23.
11. Al-Worikat AF. Landmine amputees referred to the Royal Medical Services-Jordan. *Prosthet Orthot Int*. 2001 Aug;25(2):108–12.
12. Amir LD, Aharonson-Daniel L, Peleg K, Waisman Y, Alfici R, Ishtov E, et al. The severity of injury in children resulting from acts against civilian populations. *Ann Surg*. 2005 Apr;241(4):666–70.
13. Andersson N, da Sousa CP, Paredes S. Social cost of land mines in four countries: Afghanistan, Bosnia, Cambodia, and Mozambique. *BMJ*. 1995 Sep;311(7007):718–21.
14. Arafat S, Alsabek MB, Ahmad M, Hamo I, Munder E. Penetrating abdominal injuries during the Syrian war: Patterns and factors affecting mortality rates. *Injury*. 2017 May;48(5):1054–7.
15. Arul GS, Reynolds J, DiRusso S, Scott A, Bree S, Templeton P, et al. Paediatric admissions to the British military hospital at Camp Bastion, Afghanistan. *Ann R Coll Surg Engl*. 2012 Mar;94(1):52–7.
16. Bajec J, Gang RK, Lari AR. Post Gulf war explosive injuries in liberated Kuwait. *Injury*. 1993 Sep;24(8):517–20.
17. Beitler AL, Wortmann GW, Hofmann LJ, Goff Jr JM. Operation Enduring Freedom: the 48th Combat Support Hospital in Afghanistan. *Mil Med*. 2006;171(3):189–93.
18. Bendinelli C. Effects of land mines and unexploded ordnance on the pediatric population and comparison with adults in rural Cambodia. *World J Surg*. 2009 May 16;33(5):1070–4.
19. Bertani A, Mathieu L, Dahan J-L, Launay F, Rongieras F, Rigal S. War-related extremity injuries in children: 89 cases managed in a combat support hospital in Afghanistan. *Orthop Traumatol Surg Res*. 2015 May;101(3):365–8.
20. Bilukha OO, Brennan M, Woodruff BA. Death and Injury from Landmines and



- 1  
2  
3 Unexploded Ordnance in Afghanistan. *J Am Med Assoc.* 2003 Aug 6;290(5):650–3.  
4  
5 21. Bilukha OO, Brennan M, Anderson M, Tsitsaev Z, Murtazaeva E, Ibragimov R. Seen  
6 but not heard: Injuries and deaths from landmines and unexploded ordnance in  
7 Chechnya, 1994-2005. *Prehosp Disaster Med.* 2007;22(6):507–12.  
8  
9  
10 22. Bilukha OO, Brennan M, Anderson M. The lasting legacy of war: Epidemiology of  
11 injuries from landmines and unexploded ordnance in Afghanistan, 2002-2006.  
12 *Prehosp Disaster Med.* 2008;23(6):493–9.  
13  
14  
15 23. Bilukha OO, Laurence H, Danee L, Subedi KP, Becknell K. Injuries and deaths due to  
16 victim-activated improvised explosive devices, landmines and other explosive  
17 remnants of war in Nepal. *Inj Prev.* 2011 Oct 1;17(5):326–31.  
18  
19  
20 24. Bilukha OO, Becknell K, Laurence H, Danee L, Subedi KP. Fatal and non-fatal  
21 injuries due to intentional explosions in Nepal, 2008-2011: Analysis of surveillance  
22 data. *Confl Health.* 2013;7(1):5.  
23  
24  
25 25. Bilukha OO, Leidman EZ, Sultan A-SSSS, Jaffar Hussain S. Deaths due to Intentional  
26 Explosions in Selected Governorates of Iraq from 2010 to 2013: Prospective  
27 Surveillance. *Prehosp Disaster Med.* 2015 Dec 30;30(6):586–92.  
28  
29  
30 26. Bitterman Y, Benov A, Glassberg E, Satanovsky A, Bader T, Sagi R, et al. Role 1  
31 Pediatric Trauma Care on the Israeli-Syrian Border-First Year of the Humanitarian  
32 Effort. *Mil Med.* 2016 Aug;181(8):849–53.  
33  
34  
35 27. Borgman M, Matos RI, Blackbourne LH, Spinella PC. Ten years of military pediatric  
36 care in Afghanistan and Iraq. *J Trauma Acute Care Surg.* 2012 Dec;73(6 SUPPL.  
37 5):S509–13.  
38  
39  
40 28. Borgman MA, Matos RI, Spinella PC. Isolated pediatric burn injury in Iraq and  
41 Afghanistan. *Pediatr Crit Care Med.* 2015;16(2):e23–7.  
42  
43  
44 29. Borgman MA, Maegele M, Wade CE, Blackbourne LH, Spinella PC. Pediatric Trauma  
45 BIG Score: Predicting Mortality in Children After Military and Civilian Trauma.  
46 *Pediatrics.* 2011 Apr 1;127(4):e892–7.  
47  
48  
49 30. C.P. C, B.E. L, T.E. R. Children treated at an expeditionary military hospital in Iraq.  
50 *Arch Pediatr Adolesc Med.* 2006;160(9):972–6.  
51  
52  
53 31. Can M, Yildirimcan H, Ozkalipci O, Melek M, Edirne Y, Bicer U, et al. Landmine  
54 associated injuries in children in Turkey. *J Forensic Leg Med.* 2009 Nov;16(8):464–8.  
55  
56  
57 32. Celikel A, Karaarslan B, Demirkiran DS, Zeren C, Arslan MM. A series of civilian  
58  
59  
60

- 1  
2  
3 fatalities during the war in Syria. *Ulus Travma Acil Cerrahi Derg.* 2014 Sep;20(5):338–  
4 42.  
5  
6  
7 33. Celikel A, Karbeyaz K, Kararslan B, Arslan MM, Zeren C. Childhood casualties during  
8 civil war: Syrian experience. *J Forensic Leg Med.* 2015 Aug;34:1–4.  
9  
10  
11 34. El H, Agard E, Dot C. Cephalic region war injuries in children : Experience in French  
12 NATO hospital in Kabul Afghanistan. *Injury.* 2018;49(9):1703–5.  
13  
14  
15 35. Creamer KM, Edwards MJ, Shields CH, Thompson MW, Yu CE, Adelman W.  
16 Pediatric Wartime Admissions to US Military Combat Support Hospitals in Afghanistan  
17 and Iraq: Learning from the First 2,000 Admissions. *J Trauma - Inj Infect Crit Care.*  
18 2009 Oct;67(4):762–8.  
19  
20  
21  
22 36. Dua A, Via KC, Kreishman P, Kragh JF, Spinella PC, Patel B, et al. Early  
23 management of pediatric vascular injuries through humanitarian surgical care during  
24 U.S. military operations. In: *Journal of Vascular Surgery.* 2013. p. 695–700.  
25  
26  
27 37. Edwards MJ, Lustik M, Eichelberger MR, Elster E, Azarow K, Coppola C. Blast injury  
28 in children: an analysis from Afghanistan and Iraq, 2002-2010. *J Trauma Acute Care*  
29 *Surg.* 2012 Nov;73(5):1278–83.  
30  
31  
32 38. Edwards MJ, Lustik M, Burnett MW, Eichelberger M. Pediatric inpatient humanitarian  
33 care in combat: Iraq and Afghanistan 2002 to 2012. *J Am Coll Surg.*  
34 2014;218(5):1018–23.  
35  
36  
37  
38 39. Edwards MJ, Lustik M, Carlson T, Tabak B, Farmer D, Edwards K, et al. Surgical  
39 interventions for pediatric blast injury: an analysis from Afghanistan and Iraq 2002 to  
40 2010. *J Trauma Acute Care Surg.* 2014 Mar;76(3):854–8.  
41  
42  
43 40. Er E, Kerem Ş, Güler S, Aslan Ş, Seviner M, Aksel G, et al. American Journal of  
44 Emergency Medicine Analyses of demographical and injury characteristics of adult  
45 and pediatric patients injured in Syrian civil war ☆. 2017;35:82–6.  
46  
47  
48  
49 41. Fares Y, Ayoub F, Fares J, Khazim R, Khazim M, Gebeily S. Pain and neurological  
50 sequelae of cluster munitions on children and adolescents in South Lebanon. *Neurol*  
51 *Sci.* 2013 Nov 7;34(11):1971–6.  
52  
53  
54 42. Fares Y, Fares J, Gebeily S. Head and facial injuries due to cluster munitions. *Neurol*  
55 *Sci.* 2014 Jun;35(6):905–10.  
56  
57  
58 43. Gataa ISS, Muassa QHH. Patterns of maxillofacial injuries caused by terrorist attacks  
59 in Iraq: Retrospective study. *Int J Oral Maxillofac Surg.* 2011 Jan;40(1):65–70.  
60

- 1
- 2
- 3 44. Guerriero RM, Pier DB, de Gusmao CM, Bernson-Leung ME, Maski KP, Urion DK, et
- 4 al. Increased pediatric functional neurological symptom disorders after the Boston
- 5 marathon bombings: a case series. *Pediatr Neurol*. 2014 Nov;51(5):619–23.
- 6
- 7
- 8 45. Guha-Sapir D, Rodriguez-Llanes JM, Hicks MH, Donneau AF, Coutts A, Lillywhite L,
- 9 et al. Civilian deaths from weapons used in the Syrian conflict. *BMJ*. 2015;351(April
- 10 2014):1–5.
- 11
- 12
- 13 46. Guha-Sapir D, Schluter B, Rodriguez-Llanes JM, Lillywhite L, Hicks MH-R. Patterns of
- 14 civilian and child deaths due to war-related violence in Syria: a comparative analysis
- 15 from the Violation Documentation Center dataset, 2011-16. *Lancet Glob Heal*. 2018
- 16 Jan;6(1):e103–10.
- 17
- 18
- 19 47. Gurney I. Paediatric casualties during OP TELIC. *J R Army Med Corps*.
- 20 2004;150(4):270–2.
- 21
- 22
- 23 48. Hanevik K, Kvåle G. Landmine injuries in Eritrea. 1992;1992.
- 24
- 25 49. Hemmati MA, Shokoohi H, Masoumi M, Khateri S, Soroush M, Modirian E, et al.
- 26 Mental health disorders in child and adolescent survivors of post-war landmine
- 27 explosions. *Mil Med Res*. 2015;2:30.
- 28
- 29
- 30 50. Hillman CM, Rickard A, Rawlins M, Smith JE. Paediatric traumatic cardiac arrest:
- 31 Data from the joint theatre trauma registry. *J R Army Med Corps*. 2016
- 32 Aug;162(4):276–9.
- 33
- 34 51. Hinsley DE, Rosell PAE, Rowlands TK, Clasper JC. Penetrating missile injuries during
- 35 asymmetric warfare in the 2003 Gulf conflict. *Br J Surg*. 2005 May;92(5):637–42.
- 36
- 37
- 38 52. Hodalic Z, Svagelj M, Sebalj I, Sebalj D. Surgical treatment of 1,211 patients at the
- 39 Vinkovci General Hospital, Vinkovci, Croatia, during the 1991-1992 Serbian offensive
- 40 in east Slavonia. *Mil Med*. 1999 Nov;164(11):803–8.
- 41
- 42 53. Inwald DP, Arul GS, Montgomery M, Henning J, McNicholas J, Bree S. Management
- 43 of children in the deployed intensive care unit at Camp Bastion, Afghanistan. *J R*
- 44 *Army Med Corps*. 2014 Sep;160(3):236–40.
- 45
- 46 54. Jaffe DH, Peleg K. Terror explosive injuries: a comparison of children, adolescents,
- 47 and adults. *Ann Surg*. 2010 Jan;251(1):138–43.
- 48
- 49 55. Jeevaratnam JA, Pandya AN. One year of burns at a role 3 medical treatment facility
- 50 in Afghanistan. *J R Army Med Corps*. 2014 Mar;160(1):22–6.
- 51
- 52 56. Khan I, Khan N, Naeem R, Kerai S, Allen K, Zia N, et al. Bomb blast injuries: an
- 53
- 54
- 55
- 56
- 57
- 58
- 59
- 60

- 1  
2  
3 exploration of patient characteristics and outcome using Pakistan National Emergency  
4 Departments Surveillance (Pak-NEDS) data. *BMC Emerg Med.* 2015;15 Suppl 2:S7.  
5  
6  
7 57. Kinra S, Black ME. Landmine related injuries in children of Bosnia and Herzegovina  
8 1991-2000: comparisons with adults. *J Epidemiol Community Health.* 2003  
9 Apr;57(4):264–5.  
10  
11  
12 58. Klimo P, Ragel BT, Scott WH, McCafferty R. Pediatric neurosurgery during Operation  
13 Enduring Freedom. *J Neurosurg Pediatr.* 2010 Aug;6(2):107–14.  
14  
15  
16 59. Kluger Y, Peleg K, Daniel-Aharonson L, Mayo A. The special injury pattern in terrorist  
17 bombings. *J Am Coll Surg.* 2004;199(6):875–9.  
18  
19  
20 60. RI M, JB H, Callahan C, PC S. Increased mortality rates of young children with  
21 traumatic injuries at a US Army combat support hospital in Baghdad, Iraq, 2004.  
22 *Pediatrics.* 2008;122(5):e959-66.  
23  
24  
25 61. McGuigan R, Spinella PC, Beekley A, Sebesta J, Perkins J, Grathwohl K, et al.  
26 Pediatric trauma: experience of a combat support hospital in Iraq. *J Pediatr Surg.*  
27 2007 Jan;42(1):207–10.  
28  
29  
30 62. Mckechnie PS, Wertin T, Parker P, Eckert M. Pediatric Surgery Skill Sets in Role 3:  
31 The Afghanistan Experience. *Mil Med.* 2014 Jul;179(7):762–5.  
32  
33  
34 63. Mirza FH, Parhyar HA, Tirmizi SZA. Rising threat of terrorist bomb blasts in Karachi--a  
35 5-year study. *J Forensic Leg Med.* 2013 Aug;20(6):747–51.  
36  
37  
38 64. Mousavi B, Soroush MMRM, Masoumi M, Khateri S, Modirian E, Shokoohi H, et al.  
39 Epidemiological study of child casualties of landmines and unexploded ordnances: A  
40 national study from Iran. *Prehosp Disaster Med.* 2015 Oct 16;30(5):472–7.  
41  
42  
43 65. Naylor JF, April MD, Roper JL, Hill GJ, Clark P, Schauer SG. Emergency department  
44 imaging of pediatric trauma patients during combat operations in Iraq and  
45 Afghanistan. 2018;620–5.  
46  
47  
48 66. Neff LP, Cannon JW, Morrison JJ, Edwards MJ, Spinella PC, Borgman MA, et al.  
49 Clearly defining pediatric massive transfusion: cutting through the fog and friction with  
50 combat data. *J Trauma Acute Care Surg.* 2015;78(1):22-8; discussion 28-9.  
51  
52  
53 67. Nordmann GR. Paediatric anaesthesia in Afghanistan: a review of the current  
54 experience. *J R Army Med Corps.* 2010 Dec;156(4 Suppl 1):323–6.  
55  
56  
57 68. Pannell D, Poynter J, Wales PW, Tien H, Nathens AB, Shellington D. Factors  
58 affecting mortality of pediatric trauma patients encountered in Kandahar, Afghanistan.  
59  
60

- 1  
2  
3 Can J Surg. 2015 Jun;58(3):S141–5.  
4  
5  
6 69. Pat-horenczyk R, Abramovitz R, Brom D, Chemtob CM. Adolescent Exposure to  
7 Recurrent Terrorism in Israel : Posttraumatic Distress and Functional Impairment.  
8 2007;77(1):76–85.  
9  
10  
11 70. Patregnani JT, Borgman MA, Maegele M, Wade CE, Blackbourne LH, Spinella PC.  
12 Coagulopathy and shock on admission is associated with mortality for children with  
13 traumatic injuries at combat support hospitals. *Pediatr Crit Care Med*.  
14 2012;13(3):273–7.  
15  
16  
17 71. Pearce P. Preparing to care for paediatric trauma patients. *J R Army Med Corps*.  
18 2015;161(Supp 1):i52–5.  
19  
20  
21 72. Poor Zamany Nejatkermany M, Modirian E, Soroush M, Masoumi M, Hosseini M.  
22 Phantom Limb Sensation (PLS) and Phantom Limb Pain (PLP) among Young  
23 Landmine Amputees. *Iran J child Neurol*. 2016;10(3):42–7.  
24  
25  
26 73. Quintana DA, Jordan FB, Tuggle DW, Mantor PC, Tunell WP, Parker JR, et al. The  
27 spectrum of pediatric injuries after a bomb blast. *J Pediatr Surg*. 1997 Feb;32(2):307–  
28 11.  
29  
30  
31  
32 74. Schauer SG, Hill GJ, Naylor JF, April MD, Borgman M, Bebartva VS. Emergency  
33 department resuscitation of pediatric trauma patients in Iraq and Afghanistan. *Am J*  
34 *Emerg Med*. 2018 Jan;1–5.  
35  
36  
37 75. Smith JEE, Kehoe A, Harrison SEE, Russell R, Midwinter M. Outcome of penetrating  
38 intracranial injuries in a military setting. *Injury*. 2014 May;45(5):874–8.  
39  
40  
41 76. Spinella PC, Borgman MA, Azarow KS. Pediatric trauma in an austere combat  
42 environment. *Crit Care Med*. 2008;36(7 Suppl):S293–6.  
43  
44  
45 77. Terzić J, Mestrovic J, Dogas Z, Furlan D, Biocic M. Children war casualties during the  
46 1991-1995 wars in Croatia and Bosnia and Herzegovina. *Croat Med J*.  
47 2001;42(2):156–60.  
48  
49  
50 78. Thompson DC, Crooks RJ, Clasper JC, Lupu A, Stapley SA, Cloke DJ. The pattern of  
51 paediatric blast injury in Afghanistan. *J R Army Med Corps*. 2017 Oct;  
52  
53  
54 79. Villamaria CY, Morrison JJ, Fitzpatrick CM, Cannon JW, Rasmussen TE. Wartime  
55 vascular injuries in the pediatric population of Iraq and Afghanistan: 2002-2011. *J*  
56 *Pediatr Surg*. 2014 Mar;49(3):428–32.  
57  
58  
59 80. Waisman Y, Aharonson-Daniel L, Mor M, Amir L, Peleg K. The impact of terrorism on  
60

- 1  
2  
3 children: a two-year experience. *Prehospital Disaster Med.* 2003;18(3):242–8.  
4  
5  
6 81. Walker N, Russell RJ, Hodgetts TJ. British Military Experience of Pre-Hospital  
7 Paediatric Trauma in Afghanistan. 156(3):150–3.  
8  
9 82. Armed US. Pediatric Trauma Experience in a Combat Support Hospital in Eastern  
10 Afghanistan Over 10 Months , 2010 to 2011. 2013;  
11  
12  
13 83. Woods KL, Russell RJ, Bree S, Mahoney PF, McNicholas J. The pattern of paediatric  
14 trauma on operations. *J R Army Med Corps.* 2012 Mar;158(1):34–7.  
15  
16  
17 84. Surrency AB, Graitcer PL, Henderson AK. Key factors for civilian injuries and deaths  
18 from exploding landmines and ordnance. *Inj Prev.* 2007 Jun;13(3):197–201.  
19  
20  
21 85. Watts HG. The consequences for children of explosive remnants of war: Land mines,  
22 unexploded ordnance, improvised explosive devices, and cluster bombs. *J Pediatr*  
23 *Rehabil Med.* 2009;2(3):217–27.  
24  
25  
26 86. Edwards MJ, Lustik M, Eichelberger MR, Elster E, Azarow K, Coppola C. Blast injury  
27 in children. *J Trauma Acute Care Surg.* 2012 Nov;73(5):1278–83.  
28  
29  
30 87. Regional K, Regional O, Florida I. Comparison of Outcomes for Pediatric Trauma at  
31 Different Types of Trauma Centers : The Unresolved Mystery. 2016;1054–8.  
32  
33  
34 88. Owens BD, Kragh JF, Wenke JC, Macaitis J, Wade CE, Holcomb JB. Combat  
35 wounds in operation Iraqi Freedom and operation Enduring Freedom. *J Trauma.*  
36 2008;64(2):295–9.  
37  
38  
39 89. Eastridge BJ, Salinas J, Ph D, Wade CE, Ph D, Blackbourne LH. Hypotension is 100  
40 mm Hg on the battlefield. *AJS.* 2011;202(4):404–8.  
41  
42  
43 90. Shuker ST. Effect of biomechanism mine explosion on children: Craniofacial injuries  
44 and management. *J Craniofac Surg.* 2013 Jul;24(4):1132–6.  
45  
46  
47 91. Coupland RM, Korver A. Injuries from antipersonnel mines: the experience of the  
48 International Committee of the Red Cross. *BMJ (Clinical Res Ed).*  
49 1991;303(6816):1509–12.  
50  
51  
52 92. Rosenfeld J V., Ford NL. Bomb blast, mild traumatic brain injury and psychiatric  
53 morbidity: A review. Vol. 41, *Injury.* 2010. p. 437–43.  
54  
55  
56 93. Ramasamy A, Hinsley DE, Edwards DS, Stewart MPM, Midwinter M, Parker PJ. Skill  
57 sets and competencies for the modern military surgeon : Lessons from UK military  
58 operations in Southern Afghanistan. *Injury.* 2010;41(5):453–9.  
59  
60

- 1
- 2
- 3 94. Franke A, Hentsch S, Bieler D, Schilling T, Weber W, Johann M, et al. Management
- 4 of Soft-Tissue and Bone Defects in a Local Population: Plastic and Reconstructive
- 5 Surgery in a Deployed Military Setting. *Mil Med.* 2017 Nov;182(11):e2010–20.
- 6
- 7
- 8 95. Nordmann GR, McNicholas JJ, Templeton PA, Arul S, Woods K. Paediatric trauma
- 9 management on deployment. *J R Army Med Corps.* 2011;157(3 SUPP. 1).
- 10
- 11
- 12 96. Eichelberger MR. Pediatric surgery and medicine for hostile environments. Vol. 46,
- 13 *Journal of Pediatric Surgery.* 2011. 1683 p.
- 14
- 15
- 16 97. Article O. The Experience of Phantom Limb Pain in Patients With Combat-Related
- 17 Traumatic Amputations. 2008;
- 18
- 19
- 20 98. Cummings D. Prosthetics in the developing world: a review of the literature. *Prosthet*
- 21 *Orthot Int.* 1996;20:51–60.
- 22
- 23
- 24 99. Buyukbese S, Budeyri A. ScienceDirect Mortality risk factors in war-related pediatric
- 25 burns : A comparative study among two distinct populations. *Burns.* 2018;1–18.
- 26
- 27
- 28 100. Peleg K, Aharonson-Daniel L, Michael M, Shapira SC, Michaelson M, Rivkind A, et al.
- 29 Patterns of injury in hospitalized terrorist victims. *Am J Emerg Med.* 2003;21(4):258–
- 30 62.
- 31
- 32
- 33 101. Kauvar DS, Wolf SE, Wade CE, Cancio LC, Renz EM, Holcomb JB. Burns sustained
- 34 in combat explosions in Operations Iraqi and Enduring Freedom (OIF/OEF explosion
- 35 burns). *Burns.* 2006;32(7):853–7.
- 36
- 37
- 38 102. Sharma RK, Parashar A. Special considerations in paediatric burn patients. *Indian J*
- 39 *Plast Surg.* 2010;43:S43-50.
- 40
- 41
- 42 103. Stewart BT, Trelles M, Dominguez L, Wong E, Fiozounam HT, Hassani GH, et al.
- 43 Surgical burn care by médecins sans frontières-operations center Brussels: 2008 to
- 44 2014. *J Burn Care Res.* 2016;37(6):e519–24.
- 45
- 46
- 47 104. Zeitlin REK, Järnberg J, Somppi EJ, Sundell B. Long-term functional sequelae after
- 48 paediatric burns. *Burns.* 1998;24(1):3–6.
- 49
- 50
- 51 105. Gautam S, Gupta ID, Batra L, Sharma H, Khandelwal R, Pant A. Psychiatric morbidity
- 52 among victims of bomb blast. *Indian J Psychiatry.* 1998 Jan;40(1):41–5.
- 53
- 54
- 55
- 56
- 57
- 58
- 59
- 60

1  
2  
3  
4  
5  
6  
7  
8  
9  
10  
11  
12  
13  
14  
15  
16  
17  
18  
19  
20  
21  
22  
23  
24  
25  
26  
27  
28  
29  
30  
31  
32  
33  
34  
35  
36  
37  
38  
39  
40  
41  
42  
43  
44  
45  
46  
47  
48  
49  
50  
51  
52  
53  
54  
55  
56  
57  
58  
59  
60

Confide

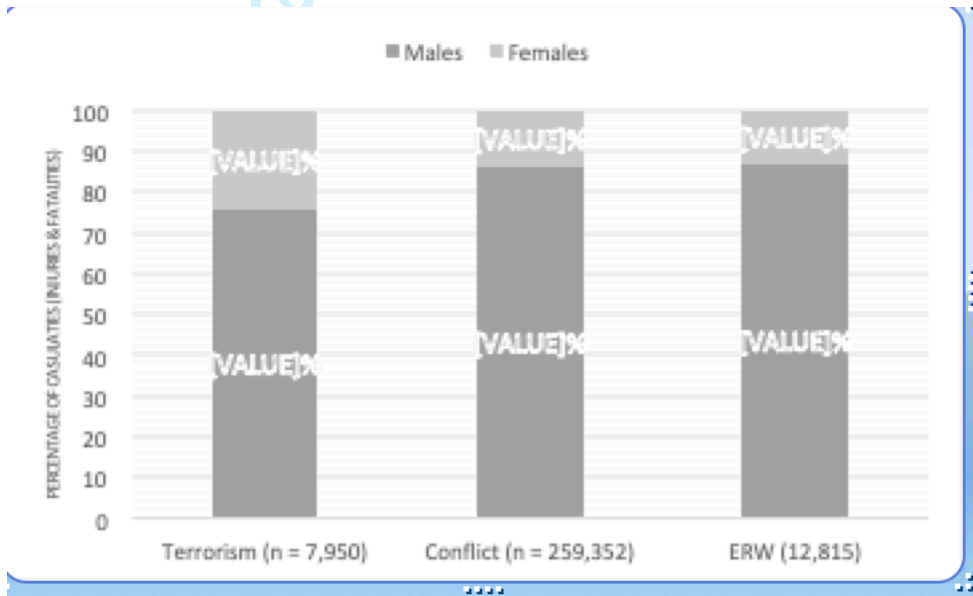

Figure 1. Gender differences in in casualties following blast

View Only



1  
2  
3  
4  
5  
6  
7  
8  
9  
10  
11  
12  
13  
14  
15  
16  
17  
18  
19  
20  
21  
22  
23  
24  
25  
26  
27  
28  
29  
30  
31  
32  
33  
34  
35  
36  
37  
38  
39  
40  
41  
42  
43  
44  
45  
46  
47  
48  
49  
50  
51  
52  
53  
54  
55  
56  
57  
58  
59  
60

Confidential

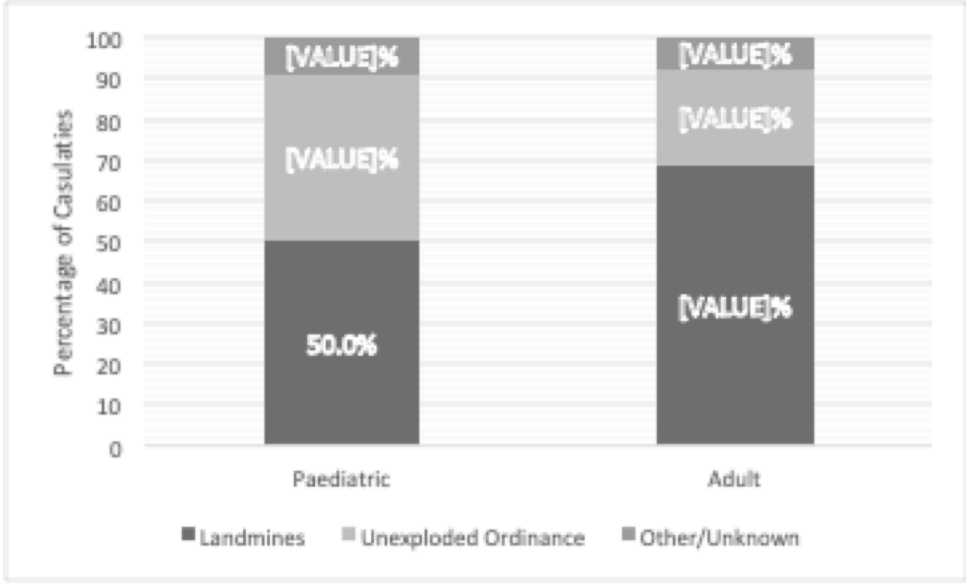

Figure 2. Percentage of Casualties (injuries and fatalities) by specific modalities

View Only

# BMJ Paediatrics Open

## **Blast Injuries in Children: a mixed-methods narrative review.**

|                               |                                                                                                                                                                                                                                                          |
|-------------------------------|----------------------------------------------------------------------------------------------------------------------------------------------------------------------------------------------------------------------------------------------------------|
| Journal:                      | <i>BMJ Paediatrics Open</i>                                                                                                                                                                                                                              |
| Manuscript ID                 | bmjpo-2019-000452.R1                                                                                                                                                                                                                                     |
| Article Type:                 | Review                                                                                                                                                                                                                                                   |
| Date Submitted by the Author: | 19-Mar-2019                                                                                                                                                                                                                                              |
| Complete List of Authors:     | Milwood Hargrave, John; Bioengineering<br>Bull, Anthony; Dept of Bioengineering<br>Pearce, Phillip; Dept of Bioengineering<br>Mayhew, Emily; Imperial College London, Bioengineering<br>Taylor, Sebastian; Royal College of Paediatrics and Child Health |
| Keywords:                     | Paediatric Practice, Paediatric Surgery, Accident & Emergency, General Paediatrics                                                                                                                                                                       |
|                               |                                                                                                                                                                                                                                                          |

SCHOLARONE™  
Manuscripts

1  
2  
3 Title:

4  
5 ***Blast injuries in children: a mixed-methods narrative review***  
6  
7

8 Authors:

9  
10 J.F.S. Millwood Hargrave, A.P. Pearce, E.R. Mayhew, A.M.J. Bull  
11  
12

13  
14 Corresponding author:

15  
16 Emily Mayhew

17  
18 Dept. of Bioengineering, Imperial College London

19  
20 Queensgate

21  
22 London SW7 2AZ

23  
24 Tel: 074949 63074

25  
26 Email: e.mayhew@imperial.ac.uk  
27  
28

29  
30 Authors:

31  
32 John F.S. Millwood Hargrave,

33  
34 South Thames Foundation School

35  
36 Royal Army Medical Corps

37  
38 208 Field Hospital, London, UK  
39  
40

41  
42 A.Phillip Pearce,

43  
44 Centre for Blast Injury Studies

45  
46 Imperial College London

47  
48 Queensgate

49  
50 London SW7 2AZ  
51  
52

53  
54 Emily R. Mayhew,

55  
56 Dept of Bioengineering

57  
58 Imperial College London  
59  
60

1  
2  
3 Anthony M.J. Bull,  
4  
5 Dept of Bioengineering  
6  
7 Imperial College London  
8  
9 Queensgate  
10  
11 London SW7 2AZ  
12  
13

14  
15 Sebastian Taylor  
16  
17 Royal College of Paediatrics and Child Health  
18  
19 5-11 St Theobald's Road  
20  
21 London WC1X 8SH  
22  
23

24  
25  
26  
27 Keywords: Paediatric, blast, trauma, conflict, outcomes  
28  
29

30  
31 Wordcount: 5,336.  
32  
33

34  
35  
36  
37  
38  
39  
40  
41 **Patient and public involvement statement:**

42  
43 **No patients or members of the public were involved in this review.**  
44  
45  
46  
47  
48  
49  
50  
51  
52  
53  
54  
55  
56  
57  
58  
59  
60

## Key questions

### What is already known on this topic?

- Approximately one in six children live in conflict zones, where exposure to blast injuries is not uncommon. Blast injuries have the potential to inflict significant mortality and morbidity upon the global paediatric population living in conflict zones.
- Describing the characteristics of injuries sustained by the paediatric population is essential in advancing local and global health policies. Despite this, common themes related to paediatric injury following to blasts are poorly described.

### What this study hopes to add?

- Paediatric victims are most likely to be male, with victims following conflict and explosive remnants of war (ERW) typically 4-10 years old. Of these victims, arable occupation and poor educational status is related to level of exposure.
- Variability in mortality exists between age groups, with increased mortality in children under 8 years old compared to older populations (10-18% vs 4-7%). As with adults, proximity to health care facilities strongly influence mortality in these populations.
- Head injuries are the leading cause of death in 46-71% of paediatric victims, and strongly associated with facial and ocular injuries conferring significant social and economic implications to the victims.
- Penetrating trauma associated with vascular injuries occurs in 3-12% of children exposed to blast injuries, considerably higher than non-blast injuries from conflict (0.6-1%), with haemorrhage a major cause of paediatric fatalities. Injuries to the torso are associated with a high surgical workload, with children twice as likely to require surgical intervention following blast injuries compared to adults (12% vs 6%).
- Injuries to the extremities are seen in approximately half of children exposed to blast trauma, with upper limb injuries requiring between 1.5 to 3 times more operative intervention compared to adults. Functional repercussions of these injuries are significant, with 15% of traumatic amputations in the lower limb frequently requiring operative and prosthetic re-revision.
- Burn injuries following explosive injuries are less frequently seen compared to adults (9-12% vs 52%), but confer a significant mortality of 36-47%, higher than that seen in non-explosive related burns (3%) and adults (5%). These patients commonly require reoperation and intensive rehabilitation, adding to the burden upon services.
- An influx of paediatric patients can rapidly overwhelm health facilities, with between 47-82% of children requiring surgical intervention, of which 25% required over 4 procedures. Greater requirement for intensive care support in addition to prolonged inpatient and rehabilitative stays contributes to considerable service strain.

## Abstract

**Background and significance.** Blast injuries arising from high explosive weaponry is common in conflict areas. While blast injury characteristics are well recognised in the adults, there is a lack of consensus as to whether these characteristics translate to the paediatric population. Understanding blast injury patterns in this cohort is essential for providing appropriate provision of services and care for this vulnerable cohort.

**Methods.** In this mixed-method review, original papers were screened for data pertaining to paediatric injuries following blasts. Information on demographics, morbidity and mortality and service requirements were evaluated. Patient and public involvement statement: No patients or members of the public were involved in this review.

**Results.** Children affected by blast injuries are predominantly male and their injuries arise from explosive remnants of war, particularly unexploded ordnance. Blasts show increased morbidity and mortality in younger children, while older children have injury patterns similar to adults. Head and burn injuries represent a significant cause of mortality in young children, while lower limb morbidity is reduced compared to adults. Children have a disproportionate requirement for both operative and non-operative service resources, and provisions for this burden are essential.

**Conclusions.** Certain characteristics of paediatric injuries arising from blasts are distinct from that of the adult cohort, while the intensive demands on services highlights the importance of understanding the diverse injury patterns in order to optimise future service provisions in caring for this vulnerable cohort.

## Introduction

Approximately one in six children live in conflict zones, with the main global burden borne by citizens of low and middle income countries (LMICs)(1). Children enmeshed in conflict and post-conflict zones are frequently exposed to high-order explosives (HE), either through explosive remnants of war (ERW) such as landmines and unexploded ordinance (UXOs), military ordinance such as shelling and aerial bombardments or acts perpetrated by non-state actors such as improvised explosive devices (IEDs) and suicide bombing(2). HE can inflict unique and unusual injuries upon the child through the blast over-pressure wave (primary blast injury), energisation of materials causing fragmentation (secondary blast injury), bodily displacement or crush injuries (tertiary blast injuries) and through burns, inhalation, toxic or psychological trauma (quaternary blast injuries)(3).

Article 3.3 of the UN Convention on the Rights of the Child (UNCRC) states that medical care of the child be delivered and supervised by providers competent in that field(4). However, paediatric care in conflict zones is often delivered by personnel for whom experience of dealing with paediatric blast injuries is unusual(5). Primary studies increasingly recognise the complex patterns of injury sustained in the adult population following blast exposure(3), however there is a lack of consensus as to whether applying lessons learnt from the adult population translates appropriately into paediatric cohorts(6). Bree et al(7) argue that principles for life-saving interventions, such as prioritising catastrophic haemorrhage, airway, breathing and circulation are just as applicable in children as adults. Conversely Fendya et al(8) contend that directly applying adult trauma principles to the paediatric population neglects the social, anatomical, physiological and psychological differences between adults and children, affecting the validity of these inferences.

While primary studies have described injuries sustained by the blast injured child, no study has attempted to synthesise the data to identify recurrent characteristics in this vulnerable cohort. Understanding the characteristics of such injuries to the paediatric population will advance efforts to prevent, mitigate, and treat these injuries in domestic and deployed health systems(3). The aim of this review is to provide an overview of injury patterns and challenges in caring for the blast-injured child, in order to define future research needs for protection, mitigation, immediate medical treatment, and rehabilitation.

## Methods

In this mixed-methods review, original peer-reviewed quantitative, qualitative and mixed-method observational studies, in addition to grey literature, were screened for data on

1  
2  
3 explosive injuries in paediatric cohorts. By utilising all study designs, greater capture of  
4 relevant literature was achieved, although this meant the data was unsuitable for a formal  
5 systematic review. PubMed and Scopus (including Embase) were searched. Search terms  
6 including “Paediatric” OR “Pediatric” OR “Child\*” OR “Children” AND “Blast” OR “Explosi\*” OR  
7 “Explosion” were used to capture potential studies. Articles had to be written in English and  
8 published before December 16, 2018. Studies involving adult as well as children were  
9 included, in addition to articles where the mechanism of injury was mixed. This decision was  
10 taken in order to accurately reflect the settings the studies represent, where victims in conflict  
11 zones are heterogenous and subject to a variety of combat related mechanisms. Studies were  
12 omitted if they did not specify explosive mechanisms or include children.  
13  
14  
15  
16  
17  
18  
19

20 Children are defined as all humans under the age of eighteen years (as specified by the United  
21 Nations Convention on the Rights of the Child)(4). The heterogeneity and arbitrary nature of  
22 what defines a child is acknowledged, and studies often utilise individual definitions. Within  
23 this review ages are defined thus: <1 year are infants, 1-8 are young children; 9-13 are older  
24 children and 14-18 are adolescents.  
25  
26  
27  
28

29 **Patient and public involvement statement:**

30  
31 No patients or members of the public were involved in this review.  
32  
33  
34  
35  
36  
37  
38  
39  
40  
41  
42  
43  
44  
45  
46  
47  
48  
49  
50  
51  
52  
53  
54  
55  
56  
57  
58  
59  
60



## Results

(Figure 1: Study selection)

Study selection of the 74 studies included in this review are shown in figure 1. Of these, 26 utilise trauma registries (table 1), 26 single centre hospital based case series (table 2), 8 use multi-centre hospital based case series (table 3), 13 use community surveillance (table 4) while 1 uses grey literature (table 5).

Table 1. The 26 studies utilising trauma registries

|                                   | Monitoring period | Location            | Setting  | Sample Size | Population                      | Exposure                                                                          | Study                                      | Effect investigated    |
|-----------------------------------|-------------------|---------------------|----------|-------------|---------------------------------|-----------------------------------------------------------------------------------|--------------------------------------------|------------------------|
| Aharonson-Daniel et al (2003)(9)  | 2000-2001         | Israel              | Civilian | 138         | Paediatric (100%)               | IEDs/Suicide IEDs (67%)<br>GSW (25%)<br>Other (8%)                                | Retrospective.<br>National Trauma Registry | Injuries and mortality |
| Aharonson-Daniel et al (2006)(10) | 2000-2004         | Israel              | Civilian | 1155        | Paediatric (8%)<br>Adult (92%)  | Suicide IEDs (100%)                                                               | Retrospective.<br>National Trauma Registry | Injuries and mortality |
| Amir et al (2005)(11)             | 2000-2002         | Israel              | Civilian | 148         | Paediatric (100%)               | IEDs/Shelling (66%)<br>GSW (34%)                                                  | Retrospective.<br>National Trauma Registry | Injuries and mortality |
| Bilukha et al (2015)(12)          | 2010-2013         | Iraq                | Civilian | 2803        | Paediatric (13%)<br>Adult (87%) | IEDs (49%)<br>Other/Unknown (51%)                                                 | Retrospective.<br>Military Trauma Registry | Injuries and mortality |
| Bitterman et al (2016)(13)        | 2013              | Israel              | Military | 84          | Paediatric (100%)               | IEDs/Shelling (67%)<br>GSW (23%)<br>Non-Combat (10%)                              | Retrospective.<br>Military Trauma Registry | Injuries and mortality |
| Borgman et al (2012)(14)          | 2001-2011         | Afghanistan<br>Iraq | Military | 128582      | Paediatric (6%)<br>Adult (94%)  | Non-Combat (40%)<br>IEDs/Shelling (38%)<br>GSW (22%)                              | Retrospective.<br>Military Trauma Registry | Injuries and mortality |
| Borgman et al (2015)(15)          | 2003-2011         | Afghanistan<br>Iraq | Military | 549         | Paediatric (100%)               | Non-Combat (84%)<br>IEDs/Shelling (11%)<br>Other/Unknown (5%)                     | Retrospective.<br>Military Trauma Registry | Injuries and mortality |
| Creamer et al (2009)(16)          | 2004-2007         | Afghanistan<br>Iraq | Military | 2090        | Paediatric (100%)               | GSW (29%)<br>IEDs/Shelling (24%)<br>Other/Unknown (22%)<br>Non-combat (25%)       | Retrospective.<br>Military Trauma Registry | Injuries and mortality |
| Dua et al (2013)(17)              | 2006-2008         | Iraq                | Military | 25          | Paediatric (100%)               | IEDs/Shelling (72%)<br>GSW (28%)                                                  | Retrospective.<br>Military Trauma Registry | Injuries and mortality |
| Edwards et al (2012)(18)          | 2002-2012         | Afghanistan<br>Iraq | Military | 4913        | Paediatric (100%)               | IEDs/Shelling (100%)                                                              | Retrospective.<br>Military Trauma Registry | Injuries and mortality |
| Edwards et al (2014)(19)          | 2002-2012         | Afghanistan<br>Iraq | Military | 6273        | Paediatric (100%)               | IEDs/Shelling (23%)<br>GSW (16%)<br>Other/Unknown (4%)<br>Non-Combat (57%)        | Retrospective.<br>Military Trauma Registry | Injuries and mortality |
| Edwards et al (2014)(20)          | 2002-2010         | Afghanistan<br>Iraq | Military | 4928        | Paediatric (100%)               | IEDs/Shelling (100%)                                                              | Retrospective.<br>Military Trauma Registry | Injuries and mortality |
| Hillman et al (2016)(21)          | 2003-2014         | Afghanistan<br>Iraq | Military | 27          | Paediatric (100%)               | IEDs /Shelling (59%)<br>GSW (26%)<br>Non-combat (15%)                             | Retrospective.<br>Military Trauma Registry | Injuries and mortality |
| Jaffe et al (2010)(22)            | 2000-2005         | Israel              | Civilian | 837         | Paediatric (14%)<br>Adult (86%) | IEDs (100%)                                                                       | Retrospective.<br>National Trauma Registry | Injuries and mortality |
| Khan et al (2015)(23)             | 2010-2011         | Pakistan            | Civilian | 103         | Paediatric (16%)<br>Adult (84%) | IEDs (100%)                                                                       | Retrospective National Trauma Registry     | Injuries and mortality |
| Kluger et al (2004)(24)           | 2000-2003         | Israel              | Civilian | 906         | Paediatric (7%)<br>Adult (93%)  | IEDs (100%)                                                                       | Retrospective.<br>National Trauma Registry | Injuries and mortality |
| McKechnie et al (2014)(25)        | 2008-2012         | Afghanistan         | Military | 766         | Paediatric (100%)               | IEDs/Shelling (51%)<br>GSW (28%)<br>Non-combat (21%)                              | Retrospective.<br>Military Trauma Registry | Injuries and mortality |
| Naylor et al (2018)(26)           | 2007-2016         | Afghanistan<br>Iraq | Military | 3439        | Paediatric (100%)               | IEDs/Shelling (38%)<br>GSW (20%)<br>Non-combat (11%)<br>Other/Not specified (31%) | Retrospective.<br>Military Trauma Registry | Injuries and mortality |
| Neff et al (2014)(27)             | 2001-2013         | Afghanistan<br>Iraq | Military | 1113        | Paediatric (100%)               | IEDs/Shelling (56%)<br>GSW (32%)<br>Non-combat (12%)                              | Retrospective.<br>Military Trauma Registry | Injuries and mortality |
| Patregnani et al (2012)(28)       | 2002-2009         | Afghanistan<br>Iraq | Military | 744         | Paediatric (100%)               | IEDs/Shelling (43%)<br>GSW (26%)<br>Non-combat (31%)                              | Retrospective.<br>Military Trauma Registry | Injuries and mortality |
| Quintana et al (1997)(29)         | 1996              | USA                 | Civilian | 66          | Paediatric (100%)               | IED (100%)                                                                        | Retrospective.<br>National Trauma Registry | Injuries and mortality |
| Schauer et al (2018)(30)          | 2007-2016         | Afghanistan<br>Iraq | Military | 3388        | Paediatric (100%)               | IEDs/Shelling (43%)<br>GSW (22%)<br>Non-combat (35%)                              | Retrospective.<br>Military Trauma Registry | Injuries and mortality |
| Smith et al (2014)(31)            | 2003-2011         | Afghanistan<br>Iraq | Military | 813         | Paediatric (6%)<br>Adult (94%)  | IEDs/Shelling (77%)<br>GSW (23%)                                                  | Retrospective.<br>Military Trauma Registry | Injuries and mortality |
| Villamaria et al (2014)(32)       | 2002-2011         | Afghanistan<br>Iraq | Military | 155         | Paediatric (100%)               | IEDs/Shelling (58%)<br>GSW (37%)<br>Other/Not specified (5%)                      | Retrospective.<br>Military Trauma Registry | Injuries and mortality |
| Walsman et al (2003)(33)          | 2000-2002         | Israel              | Civilian | 160         | Paediatric (100%)               | IEDs (67%)<br>GSW (25%)<br>Other/Not specified (11%)                              | Retrospective.<br>National Trauma Registry | Injuries and mortality |
| Woods et al (2012)(34)            | 2003-2009         | Afghanistan<br>Iraq | Military | 176         | Paediatric (100%)               | IEDs/Shelling (59%)<br>GSW (21%)<br>Non-combat (20%)                              | Retrospective.<br>Military Trauma Registry | Injuries and mortality |

Table 2. The 26 studies utilising single centre hospital based case series

|                              | Monitoring period | Location       | Setting  | Sample Size | Population                      | Exposure                                                                         | Study                                                   | Effect investigated    |
|------------------------------|-------------------|----------------|----------|-------------|---------------------------------|----------------------------------------------------------------------------------|---------------------------------------------------------|------------------------|
| Al-Worikat et al (2001)(35)  | 1988-2000         | Jordan         | Civilian | 226         | Paediatric (10%)<br>Adult (90%) | Landmines (100%)                                                                 | Retrospective. Single centre Hospital based case series | Long term sequelae     |
| Arul et al (2012)(36)        | 2011              | Afghanistan    | Military | 82          | Paediatric (100%)               | IEDs/Shelling (52%)<br>GSW (11%)<br>Non-combat (37%)                             | Retrospective. Single centre Hospital based case series | Injuries and mortality |
| Bajec et al (1993)(37)       | 1991              | Kuwait         | Civilian | 152         | Paediatric (12%)<br>Adult (88%) | Landmines (100%)                                                                 | Retrospective. Single centre Hospital based case series | Injuries and mortality |
| Beitler et al (2006)(38)     | 2002              | Afghanistan    | Military | 204         | Paediatric (28%)<br>Adult (72%) | Non-combat (44%)<br>IEDs/Shelling (36%)<br>GSW (20%)                             | Retrospective. Single centre Hospital based case series | Injuries and mortality |
| Bertani et al (2015)(39)     | 2009-2013         | Afghanistan    | Military | 89          | Paediatric (100%)               | IEDs/Shelling (79%)<br>GSW (21%)                                                 | Retrospective. Single centre Hospital based case series | Injuries and mortality |
| Coppola et al (2006)(40)     | 2004-2005         | Iraq           | Military | 85          | Paediatric (100%)               | IEDs/Shelling (29%)<br>Non-combat (44%)<br>Other/Unknown (27%)                   | Retrospective. Single centre Hospital based case series | Injuries and Mortality |
| Can et al (2009)(41)         | 2001-2008         | Turkey         | Civilian | 23          | Paediatric (100%)               | Landmines (87%)<br>UXO (13%)                                                     | Retrospective. Single centre Hospital based case series | Injuries and mortality |
| Chehab et al (2018)(42)      | 2009-2012         | Afghanistan    | Military | 81          | Paediatric (100%)               | IEDs/Shelling (67%)<br>GSW (21%)<br>Stabbing (12%)                               | Retrospective. Single centre Hospital based case series | Injuries and mortality |
| Er et al (2017)(43)          | 2013-2014         | Syria          | Civilian | 1591        | Paediatric (18%)<br>Adult (82%) | IEDs/Shelling (77%)<br>GSW (7%)<br>Other/Unknown (16%)                           | Retrospective. Single centre Hospital based case series | Injuries and Mortality |
| Fares et al (2013)(44)       | 2006-2011         | Lebanon        | Civilian | 122         | Paediatric (100%)               | UXO (100%)                                                                       | Retrospective. Single centre Hospital based case series | Long term sequelae     |
| Fares et al (2014)(45)       | 2006-2013         | Lebanon        | Civilian | 29          | Paediatric (28%)<br>Adult (72%) | UXO (100%)                                                                       | Retrospective. Single centre Hospital based case series | Injuries and mortality |
| Gurney et al (2004)(46)      | 2003              | Iraq           | Military | 78          | Paediatric (100%)               | IEDs/Shelling (7%)<br>GSW (1%)<br>Other/Not specified (9%)<br>Non-Conflict (83%) | Retrospective. Single-centre Hospital based case series | Injuries and mortality |
| Harris et al (2009)(5)       | 2008              | Afghanistan    | Military | 15          | Paediatric (100%)               | IEDs/Shelling (87%)<br>Other/Not specified (6%)<br>Non-conflict (7%)             | Retrospective. Single-centre Hospital based case series | Injuries and mortality |
| Hinsley et al (2005)(47)     | 2003              | Iraq           | Military | 79          | Paediatric (10%)<br>Adult (90%) | IEDs/Shelling (63%)<br>GSW (37%)                                                 | Retrospective Single-centre Hospital based case series  | Injuries and mortality |
| Hodalic et al (1999)(48)     | 1991-1992         | Croatia        | Military | 1211        | Paediatric (13%)<br>Adult (87%) | IEDs/Shelling (95%)<br>GSW (3%)<br>Other/Not specified (2%)                      | Retrospective. Single-centre Hospital based case series | Injuries and mortality |
| Inwald et al (2014)(49)      | 2011-2012         | Afghanistan    | Military | 112         | Paediatric (100%)               | IEDs/Shelling (54%)<br>GSW (29%)<br>Non-conflict (17%)                           | Retrospective Single-centre Hospital based case series  | Injuries and mortality |
| Jeevaratnam et al (2013)(50) | 2010              | Afghanistan    | Military | 88          | Paediatric (35%)<br>Adult (65%) | IEDs/Shelling (33%)<br>Non-conflict (67%)                                        | Retrospective Single-centre Hospital based case series  | Injuries and mortality |
| Klimo et al (2010)(51)       | 2007-2009         | Afghanistan    | Military | 43          | Paediatric (100%)               | IEDs/Shelling (67%)<br>GSW (5%)<br>Non-combat (28%)                              | Retrospective. Single-centre Hospital based case series | Injuries and mortality |
| Matos et al (2008)(52)       | 2003-2004         | Iraq           | Military | 1132        | Paediatric (3%)<br>Adult (97%)  | IEDs/Shelling (64%)<br>Non-combat (36%)                                          | Retrospective. Single-centre Hospital based case series | Injuries and mortality |
| McGuigan et al (2007)(53)    | 2004              | Iraq           | Military | 99          | Paediatric (100%)               | GSW (42%)<br>IEDs/Shelling (35%)<br>Other/Not specified (23%)                    | Retrospective. Single-centre Hospital based case series | Injuries and mortality |
| Nordmann et al (2010)(54)    | 2008-2009         | Afghanistan    | Military | 31          | Paediatric (100%)               | IEDs/Shelling (45%)<br>GSW (32%)<br>Non-combat (23%)                             | Retrospective. Single-centre Hospital based case series | Injuries and mortality |
| Pannell et al (2015)(55)     | 2010-2011         | Afghanistan    | Military | 263         | Paediatric (100%)               | IEDs/Shelling (42%)<br>GSW (17%)<br>Non-combat (41%)                             | Retrospective. Single-centre Hospital based case series | Injuries and mortality |
| Pearce et al (2015)(56)      | 2011-2012         | Afghanistan    | Military | 281         | Paediatric (100%)               | IEDs/Shelling (47%)<br>GSW (13%)<br>Non-combat (35%)                             | Retrospective. Single-centre Hospital based case series | Injuries and mortality |
| Terzic et al (2001)(57)      | 1991-1995         | Bosnia Croatia | Civilian | 92          | Paediatric (100%)               | IEDs/Shelling/UXO (100%)                                                         | Retrospective. Single-centre Hospital based case series | Injuries and mortality |
| Thompson et al (2017)(58)    | 2006-2013         | Afghanistan    | Military | 295         | Paediatric (100%)               | IED (68%)<br>UXO (4%)<br>Other/Not specified (28%)                               | Retrospective. Single-centre Hospital based case series | Injuries and mortality |
| Walker et al (2010)(59)      | 2006-2007         | Afghanistan    | Military | 78          | Paediatric (100%)               | IEDs/Shelling (64%)<br>GSW (37%)<br>Other/Not specified (5%)                     | Retrospective. Single-centre Hospital based case series | Injuries and mortality |
| Wilson et al (2013)(60)      | 2010-2011         | Afghanistan    | Military | 41          | Paediatric (100%)               | IEDs/Shelling (47%)<br>GSW (12%)<br>Non-combat (42%)                             | Retrospective. Single-centre Hospital based case series | Injuries and mortality |

Table 3. The 8 studies utilising multi-centre hospital based case series

|                             | Monitoring period | Location | Setting  | Sample Size | Population                      | Exposure                                                | Study                                                           | Effect investigated    |
|-----------------------------|-------------------|----------|----------|-------------|---------------------------------|---------------------------------------------------------|-----------------------------------------------------------------|------------------------|
| Arafat et al (2017)(61)     | 2012-2013         | Syria    | Civilian | 324         | Paediatric (18%)<br>Adult (82%) | IEDs/Shelling (57%)<br>GSW (43%)                        | Retrospective. Multi-centre Hospital based case series          | Injuries and mortality |
| Bendinelli et al (2009)(62) | 2003-2006         | Cambodia | Civilian | 356         | Paediatric (26%)<br>Adult (74%) | Landmines (67%)<br>UXO (33%)                            | Retrospective. Multi centre Hospital based case series          | Injuries and mortality |
| Celikel et al (2014)(63)    | 2012              | Syria    | Civilian | 186         | Paediatric (22%)<br>Adult (78%) | IEDs/Shelling (67%)<br>GSW (26%)<br>Other/Unknown (7%)  | Retrospective. Multi-centre Hospital based mortuary case series | Mortality              |
| Celikel et al (2015)(64)    | 2012-2014         | Syria    | Civilian | 140         | Paediatric (100%)               | IEDs/Shelling (70%)<br>GSW (14%)<br>Other/Unknown (16%) | Retrospective. Multi-centre Hospital based mortuary case series | Mortality              |

|                           |           |                     |          |      |                                 |                             |                                                                |                        |
|---------------------------|-----------|---------------------|----------|------|---------------------------------|-----------------------------|----------------------------------------------------------------|------------------------|
| Gataa et al (2011)(65)    | 2005-2006 | Iraq                | Civilian | 551  | Paediatric (20%)<br>Adult (80%) | IEDs (82%)<br>GSW (18%)     | Retrospective. Multi-centre Hospital based case series         | Injuries and mortality |
| Hanevik et al (2000)(66)  | 1991-1995 | Eritrea             | Civilian | 248  | Paediatric (63%)<br>Adult (37%) | Landmines (100%)            | Retrospective. Multi-centre Hospital based case series         | Injuries and mortality |
| Mirza et al (2013)(67)    | 2007-2011 | Pakistan            | Civilian | 1142 | Paediatric (6%)<br>Adult (94%)  | IEDs (100%)                 | Retrospective Multi-centre Hospital based mortuary case series | Injuries and mortality |
| Spinella et al (2008)(68) | 2001-2007 | Afghanistan<br>Iraq | Military | 1305 | Paediatric (100%)               | Trauma (Unspecified) (100%) | Retrospective. Multi-centre Hospital based case series         | Injuries and mortality |

Table 4. The 13 studies utilising community surveillance

|                                    | Monitoring period | Location                                        | Setting  | Sample Size | Population                      | Exposure                                                    | Study                                              | Effect investigated                        |
|------------------------------------|-------------------|-------------------------------------------------|----------|-------------|---------------------------------|-------------------------------------------------------------|----------------------------------------------------|--------------------------------------------|
| Andersson et al (1995)(69)         | 1994-1995         | Afghanistan<br>Bosnia<br>Cambodia<br>Mozambique | Civilian | 2100        | Paediatric (100%)               | Landmines (100%)                                            | Retrospective. community surveillance              | Socio-economic                             |
| Bilukha et al (2003)(70)           | 2001-2002         | Afghanistan                                     | Civilian | 1636        | Paediatric (46%)<br>Adult (54%) | UXO (47%) Landmine (41%)<br>Other/Unknown (12%)             | Retrospective. Community Surveillance              | Injuries and mortality                     |
| Bilukha et al (2007)(71)           | 1994-2005         | Chechnya                                        | Civilian | 3021        | Paediatric (30%)<br>Adult (70%) | Landmines (41%)<br>UXO (37%)<br>Other/Unknown (22%)         | Retrospective. Community Surveillance              | Injuries and mortality                     |
| Bilukha et al (2008)(72)           | 2002-2006         | Afghanistan                                     | Civilian | 5471        | Paediatric (54%)<br>Adult (46%) | UXO (50%)<br>Landmines (42%)<br>Other/Unknown (8%)          | Retrospective. Community Surveillance              | Injuries and mortality                     |
| Bilukha et al (2011)(73)           | 2006-2010         | Nepal                                           | Civilian | 307         | Paediatric (58%)<br>Adult (42%) | IEDs (76%)<br>Landmines (4%)<br>Other/Unknown (20%)         | Retrospective. Community Surveillance              | Injuries and mortality                     |
| Bilukha et al (2013)(74)           | 2008-2011         | Nepal                                           | Civilian | 437         | Paediatric (14%)<br>Adult (76%) | IEDs (69%)<br>Other/Unknown (31%)                           | Retrospective. Community Surveillance              | Injuries and mortality                     |
| Guerrero et al (2014)(75)          | 2013              | USA                                             | Civilian | 11          | Paediatric (100%)               | IEDs (100%)                                                 | Prospective. Community Surveillance                | Long term sequelae                         |
| Guha-Sapir et al (2018)(76)        | 2011-2016         | Syria                                           | Civilian | 101453      | Paediatric (17%)<br>Adult (83%) | Shelling/Air bombardment (57%)<br>Other/Not specified (43%) | Retrospective. Community Surveillance              | Mortality                                  |
| Hemmati et al (2015)(77)           | 1988-2013         | Iran                                            | Civilian | 78          | Paediatric (100%)               | Landmines (100%)                                            | Cross-section. Community surveillance              | Long term sequelae                         |
| Kinra et al (2003)(78)             | 1991-2000         | Bosnia and Herzegovina                          | Civilian | 4064        | Paediatric (14%)<br>Adult (86%) | Landmines (100%)                                            | Retrospective. Community Surveillance              | Injuries and mortality                     |
| Mousavi et al (2015)(79)           | 2014              | Iran                                            | Civilian | 78          | Paediatric (100%)               | Landmines (80%)<br>UXO (20%)                                | Retrospective. Mixed-method community surveillance | Long-term sequelae/ Injuries and mortality |
| Pat-Horenczyk et al (2007)(80)     | 2006              | Israel                                          | Civilian | 695         | Paediatric (100%)               | IEDs (100%)                                                 | Retrospective. Mixed-method community surveillance | Long term sequelae                         |
| Poor Zamany Nejat et al (2016)(81) | 2015              | Iran                                            | Civilian | 41          | Paediatric (100%)               | Landmines (100%)                                            | Retrospective mixed-method community surveillance  | Long term sequelae                         |

Table 5. The 1 study utilising grey literature

|                             | Monitoring period | Location | Setting  | Sample Size | Population                      | Exposure                         | Study           | Effect investigated |
|-----------------------------|-------------------|----------|----------|-------------|---------------------------------|----------------------------------|-----------------|---------------------|
| Guha-Sapir et al (2015)(82) | 2011-2014         | Syria    | Civilian | 78769       | Paediatric (16%)<br>Adult (84%) | IEDs/Shelling (75%)<br>GSW (25%) | Grey-literature | Mortality           |

## Demographics

Following the use of explosive weaponry by non-state actors against civilians, the most commonly injured paediatric cohort are males aged 10-18 years old(9,11,33), while children involved in conflict and ERW blast injuries were generally aged between 4-10 years old(18,59). Perpetrators target busy areas such as restaurants and nightclubs which older children and adolescents might frequent (10, 11,33), while cultural factors within LMICs in these social areas result in a predominantly male cohort (9,10,12,22–24,33,67,75,80). Similar gender finding are observed in children following conflict and ERW related injuries where all studies showed male predominance in victims, with over 70% male in three quarters of the studies (Figure 2).

(Figure 2. Gender differences in in casualties following blast)

1  
2  
3 ERW contribute considerable morbidity and mortality both during and following conflict. As  
4 seen in figure 3, children were more likely to be injured by UXO compared with adults, while  
5 landmines affected a predominately adult cohort (35,37,41,62,69,70,72,73,78).  
6  
7  
8  
9  
10

11 (Figure 3. Percentage of Casualties (injuries and fatalities) by specific modalities)  
12

13  
14 UXOs have been described as small, colourful and toy-like, promoting child interaction and  
15 subsequent injury from handling, resulting in often fatal upper limb, head, neck or chest  
16 injury(41,44,62,83,84). Due to the social nature of children, these interactions commonly occur  
17 in groups, leading to multiple casualties in 45-63% of events involving children compared to  
18 30-40% in adults(70,78,79).  
19  
20  
21  
22

23 Occupation and education play a role in ERW injuries. It is common for children in LMICs,  
24 particularly males, to assist their family with herding and farming as opposed to attending  
25 school. This may affect the likelihood to exposure to ERWs through increased freedom to  
26 roam where such devices are present(25,42,64,72). A lack of formal education impacts the  
27 child's ability to read warning signs; only 6-22% of victims were aware ERWs were  
28 present(27,80) and of these, only 0-11% had received ERW risk education(23,25,27,80).  
29  
30  
31  
32

33 Children are particularly vulnerable to wide-area explosives such as aerial bombardment and  
34 shelling, particularly in the primarily urbanised environments of modern conflicts. In the Syrian  
35 Civil War, three quarters of wide-area explosives were used in civilian residential areas that  
36 children frequent, with these mechanisms responsible for 82% of child deaths(76,82).  
37  
38  
39  
40

41 The following section reviews what is known of mortality in children before reviewing injury  
42 types.  
43  
44

## 45 **Mortality**

46  
47  
48 Comparison of paediatric wartime mortality data is difficult as many studies do not differentiate  
49 mechanism of injury. Edwards et al(85) study on 4,913 children between 2002-2010  
50 presenting with blast injuries remains the single largest data set. The reported mortality rate  
51 of 8% matches well with the mortality rates of 6-9% quoted in paediatric trauma deaths from  
52 Iraq and Afghanistan, although these studies displayed all trauma mechanisms as opposed to  
53 specifying blast trauma(14,16,20,25,36,40). Between 2006-2013, Thompson et al. (58) noted  
54 a mortality rate over double of that quoted by Edwards et al. following paediatric blast injury  
55  
56  
57  
58  
59  
60

1  
2  
3 in Afghanistan (18%). Operational tempo and the increasing use of IEDs have been  
4 hypothesized to underlie these discrepancies in mortality(58).  
5  
6

7 Age related variation in mortality has been described. Matos et al noted mortality was highest  
8 at 24% in young children (5-8 year old)(52) while Schauer et al and Spinella et al found  
9 greatest mortality in 0-4 years(30,68). Similarly, Borgman et al and Matos et al noted that  
10 children <8 years old had increased trauma mortality compared to 8-16 year olds (10-18% vs  
11 4-7%)(15,52), while Spinella et al noted a similar increase in mortality in young children (<6  
12 year old) compared to 6-16 year olds (11% vs 4%)(68). Few studies directly compare adult  
13 and paediatric mortality, and comparisons between studies are difficult due to methodological  
14 differences. What is common is that mortality in children following combat related trauma is  
15 considerably higher than that of paediatric non-combat trauma (2-3%)(86) and adult military  
16 combat casualties (1-3%)(87,88).  
17  
18  
19  
20  
21  
22  
23

24 A wide range of paediatric mortality is reported following mine strikes, ranging from 4-  
25 46%(41,44,62,69–74,83). Shuker et al(89) suggested that approximately half of paediatric  
26 victims die within minutes of mine explosion, likely due to lacerations to the head, major blood  
27 vessels or vital organs causing non-survivable injuries, in keeping with adult literature(87,88).  
28 Time critical injuries following blasts may represent particular problems in LMIC's, where pre-  
29 hospital evacuation chains may be protracted. Coupland(90) noted that in 1991, only 14% of  
30 paediatric and adult ERW victims were admitted in under six hours, while the majority (58%)  
31 were admitted between 6-24 hours and 28% presented after 24 hours. Even in recent conflicts,  
32 Bitterman et al(13) found <10% of children presented within 1 hour, with over a third presenting  
33 after 6 hours. Protracted evacuation of paediatric victims add to blast mortality, reinforced by  
34 studies observing a 85-91% mortality of children either at scene or en-route to health  
35 facilities(73,89).  
36  
37  
38  
39  
40  
41  
42  
43  
44

### 45 **Vascular injuries**

46 Penetrating injuries occur in 38-76% of blast-exposed children (9,10,14,16,33,36,37,55), with  
47 incidence greater in older children aged 10-16 compared to 0-10 year olds (65-83% vs 47-  
48 63%)(22,52). In keeping with penetrating injury patterns, vascular injury was observed in 3-  
49 12% of children following blast trauma (9,32,33,37), considerably higher compared to non-  
50 blast conflict trauma where vascular injury occurred in 0.6-1% of paediatric  
51 victims(9,10,24,32,53).  
52  
53  
54  
55  
56  
57

58 Vascular damage and subsequent haemorrhage following explosions have been identified as  
59 a significant cause of childhood fatalities, ranging from the primary cause of death in 21-38%  
60

1  
2  
3 during the Syrian Civil War(63,64) to 63% following IED and suicide attacks in Pakistan(67),  
4 while mortality rates following penetrating injuries in civilian settings are considerably lower  
5 (5%)(32). Extremity trauma was most highly associated with vascular injuries, with the majority  
6 of vascular injuries occurring in the lower limb (38-58%) followed by the upper limbs (25-  
7 28%)(17,32). This is in keeping with adult data where 54% of injuries were sustained to the  
8 extremities(87). Despite its high prevalence, extremity vascular wounds confer reduced risk of  
9 death compared to vascular damage within the torso, attributed as the primary cause of death  
10 in 71% of paediatric deaths and conferring a four-fold increased risk of death compared to  
11 extremity vascular injuries(32).  
12  
13

14  
15  
16  
17  
18 Data on vascular damage is clear: older children and adolescents sustain similar rates of  
19 vascular injury to adults, particularly to the extremities, while mortality following penetrating  
20 trauma is primarily the result of injuries to the vasculature within the torso.  
21  
22  
23

### 24 25 **Head injuries**

26  
27 The prevalence of head injuries following blasts are diverse, ranging from 6-54%  
28 (10,11,40,42,43,47-49,53,13,16,18,32,33,36,38,39), while adult combat data ranges from 16-  
29 29%(87). This variation is due to the heterogenous definitions of head injury described in these  
30 studies, with few studies differentiating between superficial scalp wounds, blunt traumatic  
31 brain injury (TBI) or penetrating TBI. Where head injuries were documented, TBI was recorded  
32 in 21-62% of paediatric victims, of which 38-39% were defined as penetrating(33,45,48).  
33 Unsurprisingly, papers noted over double the incidence of paediatric penetrating head injury  
34 in blast trauma compared to mainly blunt civilian trauma (13% vs 6%), while the reverse was  
35 true in closed head injuries, with half the incidence of closed head injuries in blast injuries  
36 compared to civilian trauma (22% vs 44%)(9).  
37  
38  
39  
40  
41  
42  
43

44 Cerebral haemorrhage and direct cranial damage following blast have been attributed as a  
45 leading cause of death in children, responsible for 46-71% of fatalities (36-38,43,101).  
46 Creamer(38) noted penetrating wounds to the head accounted for 44% of child deaths in the  
47 emergency department while open skull fractures with cerebral evisceration was documented  
48 in 88% of paediatric fatalities following the 1995 Oklahoma City bombings(102). While  
49 penetrating head injuries undoubtedly carry high mortality, Woods(34) noted that 8 children  
50 survived to hospital discharge despite penetrating head injuries deemed initially unsurvivable,  
51 suggesting such are not unequivocally fatal.  
52  
53  
54  
55  
56

57 Er et al(43) noted that children were more likely to be injured in the head compared to adults  
58 (54% vs 40%) following aerial and shelling during the Syrian Civil War, while young children  
59  
60

1  
2  
3 aged between 0-4 year old were more likely to undergo neurosurgical procedures compared  
4 to other ages(20,51), 48% of which were craniectomies or craniotomies for penetrating brain  
5 injury, mainly secondary to IED blasts(51). Suggested reasons for this increase may relate to  
6 anatomical predispositions, particularly in infants, such as large head to body ratios in addition  
7 to reduced skull rigidity(22) as well as the relatively shorter distance from the head to ground-  
8 based ERW and IEDs compared to adults(18,22,62,84,89).  
9  
10  
11  
12

13  
14 There is a clear lack of studies investigating long term outcomes following blast- associated  
15 head injuries. While significant cognitive, intellectual and functional sequelae arising from non-  
16 blast TBI (nbTBI) have been described, controversy exists as to whether nbTBI is analogous  
17 to blast-induced TBI(91), and the paucity of paediatric data means this comparison is even  
18 more problematic.  
19  
20  
21

22  
23 A unifying message is that head injuries are associated with high morbidity and mortality in  
24 paediatric blast trauma, while the long term consequences remain largely unknown. Head  
25 injuries are commonly penetrating compared to civilian practice, and increased operative  
26 demand in infants and toddlers for neurosurgical procedures may stretch medical service  
27 expertise.  
28  
29  
30

### 31 **Facial and ocular injuries**

32  
33  
34 Blasts result in injury to the face in between 27-48% of paediatric victims, compared to 12%  
35 resulting from GSW(11,18,49) and 10% in adults(87). Relative to other blast related injuries,  
36 facial injuries in isolation are associated with reduced mortality(18). However, Gataa (65)  
37 noted that of the patients presenting with facial injuries, 29% had concomitant eye injury, 22%  
38 had TBI, while life-threatening facial bleeding occurred in 10% of patients. In addition to  
39 physical sequelae, facial injuries are associated with functional and psychological disorders  
40 stemming from stigmatisation of disfiguring injuries with implications for future social,  
41 economic and marital prospects(65).  
42  
43  
44  
45  
46  
47

48  
49 Despite only comprising of 0.3% of the anterior body surface, the eye is sensitive to blast  
50 injury, with ocular injuries in 4-28% of children following trauma related to combat or ERW  
51 (13,16,36,38,39,42,45,53,79). In keeping with patterns of facial injury, an increased  
52 prevalence of eye injury is associated with blast injuries compared to GSW (13% vs 3%)(11).  
53 Landmines are often associated with multiple foreign bodies on the conjunctiva, cornea and  
54 sclera, in addition to sight-threatening injuries such as enucleation or eye globe  
55 perforation(41). Monocular enucleation was observed in 4%, while bilateral enucleation, and  
56 hence blindness, was more common (14%)(41,79). When compared to adult victims of  
57  
58  
59  
60

landmines and cluster bombs, children have more eye injuries (14% vs 8%)(78) as well as twice the prevalence of eye globe perforation (28% vs 14%)(43) and complete loss of vision (21 vs 10%)(62). Without adequate support, both monocular and bilateral vision loss may translate to developmental and educational deficiencies in the growing child.

Facial and eye injuries are frequent following exposure to blasts, and should raise suspicion of intracranial injury. Important are the social and education implications of these disfiguring injuries in the growing child.

### **Torso Injuries**

Following blast injury, trauma to the torso is common, varying from 12-46% between studies (11,13,41,43,47-49,67,16-18,32,36,38-40) and peaking in 5-10 year olds(22,33). Er et al.'s (43) study on civilian paediatric injuries during the Syrian Civil War noted that the abdomen was less commonly injured compared to adults (12 vs 20%), while chest injury with accompanying lung contusion was present in 51% of children with torso injuries, compared to 35% in adults. Both chest and abdominal injuries from blast are typically classed as 'severe'(18). Abdominal injuries accounted for 18-19% of injury specific deaths following blast in the paediatric population, while chest injuries have been attributed to 8% of deaths in the ED(16). Explanations for this susceptibility to severe and life threatening torso injuries include a lack of body armour compared to adult combat victims and the observation that children have flexible rib cages allowing greater damage to underlying structures without rib fracture, contributing to the increase in lung contusion observed(32).

When organ specific injuries were examined, blast was most likely to cause open penetrating wounds of the bowel and intra-abdominal organs, affecting the small intestine in over a third (34%) and the liver, spleen or pancreas in 36%(16,54,61). Where internal organ damage was sustained, injury specific mortality almost doubled from 15 to 29%(63). These injuries were frequently contaminated due to bowel rupture, requiring multiple procedures and a high rate of antibiotic usage(57). The thinner abdominal walls, reduced intraabdominal fat and larger solid organs relative to the body cavity increases likelihood of visceral damage following penetrating trauma, while delayed signs of visceral damage support the role of repeated examination and radiological input, even in the absence of external damage.

In the context of total operative procedures performed, laparotomies comprised a significant component of total surgical workload, encompassing 12-23% of all paediatric procedures performed(25,58,92). Children were more likely to require laparotomies following combat trauma compared to paediatric non-combat, and primarily blunt, abdominal trauma (13 vs 2%).



1  
2  
3 Children in combat zones were also twice as likely to undergo laparotomies compared to US  
4 service personnel (12% vs 6%)(68). In addition to the high prevalence of abdominal injuries,  
5 children frequently swallow air when frightened or in pain, resulting in gastric dilation. As well  
6 as increasing vomiting risk, this may erroneously suggest abdominal injury(89) and lead to  
7 laparotomy. Despite this, Arafat et al(61) noted that only 8% of laparotomies were negative,  
8 supporting the role of explorative laparotomies in penetrating trauma following blasts.  
9  
10  
11  
12

13 Compared to both adults and children in non-conflict settings, the blast injured child is more  
14 likely to sustain injuries to the chest. While abdominal injuries are less frequent, they are more  
15 likely to involve visceral damage and require operative management compared to adult  
16 combat trauma.  
17  
18  
19  
20

### 21 **Extremity injuries**

22  
23  
24 Extremity injury is one of the defining features following blast related trauma. Extremity injuries  
25 within conflict zones are observed in just under half of children (45%), its prevalence  
26 increasing in blast injuries (69%)(49), with a retrospective study finding 100% of traumatic  
27 amputations and 96% of bone injuries to hand and foot were secondary to blast injuries(39).  
28  
29  
30

31 Studies describe extreme variation in the prevalence of upper limb injuries following blasts,  
32 ranging from 6-74% (13,25,40,41,47,48,58,67,69,29,32,33,35-39), with the greatest upper  
33 limb injury reported following UXO and cluster munition strike(41,44). Compared to adult and  
34 particularly following ERW blast, children were more likely to sustain upper limb injuries  
35 (62,67,70-73) with a corresponding increase of 150-300% requiring operative amputation,  
36 typically at the level of the finger (37,66,71,72). Traumatic amputation of the upper limb was  
37 common and limited to the hands in 44-94% of children sustaining upper limb injuries(38,41),  
38 while trans-radial and trans-humeral amputation was less frequent (14-34%)(25,48) but were  
39 more likely to be bilateral(79). Arm fractures necessitating surgical fixation were observed in  
40 45%(29), while upper limb vasculature was commonly disrupted(17,32,48).  
41  
42  
43  
44  
45  
46  
47

48 Similarly, prevalence of lower limb injuries shows variation between studies on blast affecting  
49 25-86% of children(13,25,48,67,29,35-38,40,41,47), with landmine strikes particularly  
50 associated with lower limb injury(35,37,41); 20-29% required operative amputations, normally  
51 at the trans-tibial plane(37,38,79). Lower limb injuries were less common in children compared  
52 to adults(62,70,72-74), with incidence lowest in 0-3 year olds(22), while increasing in  
53 adolescents to mirror adults(62). Traumatic amputations were less frequent compared to the  
54 upper limb, occurring in 14-35% of lower limb injuries(25,41,48).  
55  
56  
57  
58  
59  
60

1  
2  
3 Landmines drive debris, footwear and clothing upward between planes of the soft tissues and  
4 bone, leading to degloving injuries of the leg, perineum and lower abdominal viscera, as well  
5 creating serious potential for soft tissue and bone infection in the remaining limb(84,90). While  
6 large bony defects of the lower limb are problematic in children(93), reconstruction with limited  
7 shortening (<2 cm) has been associated with good outcomes, with the capability for highly  
8 active growth plates to remodel and compensate for this (39,94). However, 75% of new growth  
9 occurs in the distal femur and tibia growth plates, with the distal limb most prone to explosive  
10 disruption(84).

11  
12  
13  
14  
15  
16  
17 The long term physical, psychosocial and financial repercussions of amputation must not be  
18 underestimated. Physical complications are greatest following TA and below knee  
19 amputations, and include anterior and varus bowing, heterotopic ossification and osseous  
20 overgrowth requiring operative or prosthetic revision(95). Overgrowth is particularly  
21 problematic in younger patients (under 12 years), with 15% of patients sustaining amputations  
22 requiring re-vision of their stump. Protracted phantom limb sensation (PLS) and phantom limb  
23 pain (PLP) is reported in over 50% of children following blast related amputation, similar to  
24 that seen in adult literature following blasts(96), yet over five times higher than in children  
25 requiring amputation following non-traumatic indications such as malignancy. Increased PLS  
26 has been reported in lower limb amputations, while PLP was increased in upper limb  
27 amputations (22,100). Social acceptance of the child amputee is culturally specific, with  
28 stigmatisation in certain cultures negatively impacting the child's psychological, social and  
29 educational status(97). While there is a paucity of outcome and long term costing studies in  
30 LMICs, the financial burden of prolonged rehabilitation and repeated revision of prosthesis on  
31 the children and host country's health system is likely to be considerable(97).

32  
33  
34  
35  
36  
37  
38  
39  
40  
41 Like adults involved in blast trauma, older and adolescents children are prone to extremity  
42 injury, particularly of the upper limb, while infants and toddlers experience less extremity  
43 injuries. Limb injury causes diverse complications in the growing child with increased  
44 requirement for re-revision compared to adults.

#### 45 46 47 48 49 **Burn injuries**

50  
51  
52 Multiple retrospective studies have noted that the majority of burns in children result from  
53 civilian mechanisms such as scalding, open fires and flash burns from household cooking  
54 fuels (15,16,46,98,99), while approximately 9-12% is the result of high-order explosives  
55 observed in combat blast modalities(46,99), less than observed in adult combat populations  
56 (52%)(100). Unlike civilian mechanisms however, blast-induced burns rarely occur in isolation,  
57 with multidimensional injuries playing a significant role in the child's prognosis(33,50,99).

1  
2  
3 While post-mortem findings following the Syrian Civil War attributed only 0.5% of deaths being  
4 secondary to burns(63), conflict-related burn victims had higher mortality compared to non-  
5 conflict related burn victims (47% vs 3%)(98), and significantly greater than blast related burns  
6 in adult military populations (5%)(100). Severe burns following blasts were sustained in 30%  
7 of children, and fatal in 36-40%(18,40).  
8  
9  
10

11  
12 Creamer(38) noted the median age of burn victims as 6 years old. At this young age, the  
13 anatomical disproportionality of the child increases the total body surface area (TBSA),  
14 resulting in significant burn surface area (BuSA). Thus, approximately half of paediatric burns  
15 in conflict zones result in BuSA >15% (32,127), while 13% of children have BuSA exceeding  
16 40%(127). A high BuSA exceeding 40% has been linked to myocardial damage and  
17 hypotension, making hemodynamic management challenging, while complications including  
18 nosocomial infection of the burn eschar and pneumonia are not uncommon(98). Within LMICs,  
19 protein loss and weight based fluid resuscitation is complicated by malnourishment, while cold  
20 fluids may accentuate hypothermia(46).  
21  
22  
23  
24  
25  
26

27  
28 In conflict related burns, the head and neck are most frequently affected, potentially leading  
29 to thermal inhalation injuries(50,99). Thermal inhalation injuries in paediatric victims are  
30 difficult to assess, and clues to inhalational injuries such as increased respiratory rate may be  
31 incorrectly interpreted in the context of physiological age discrepancies. In addition the  
32 paediatric subglottis represents the narrowest section of the upper airway, and deteriorates  
33 rapidly from burn-induced laryngeal oedema, especially in the context of failed intubation  
34 attempts(101) leading to rapid oxygen desaturation. Between 21-33% of children were  
35 identified as having inhalational injuries requiring pre-emptive or immediate intubation to  
36 protect the airways(50,53), similar to that seen in adult combat casualties (26%)(100). Of this  
37 paediatric cohort with inhalational injuries, 39% died(50), significantly greater than in adult  
38 populations (4%)(100).  
39  
40  
41  
42  
43  
44

45  
46 Prognosticating factors noted for burns include increased time to presentation, prolonged  
47 hospital length of stay and requirement for critical care input(98). This relates to the resource-  
48 intensive management of the paediatric burns patient. Like adults, hospital length of stay for  
49 burns patients are 2-3 times that of the general paediatric population(36,99), while ICU  
50 requirements are increased, particularly in burns secondary to blast injuries(98,99). Operative  
51 demands of paediatric burn victims are significant. Children aged 6 months to 3 years were  
52 between 4-14 times more likely than adults to require surgical input, reflecting the significant  
53 burden of burns (39% of this cohort compared to 2-6% in adults(102)). While other conditions  
54 may be treated by a single operation, burns often require serial procedures(102), with an  
55 average 2 operations per patient. This creates a disproportionate operative volume in both  
56  
57  
58  
59  
60

adults and paediatric patients compared to other surgical emergencies(102). Burns induced by blast injuries require more escharotomies (27% vs 4%  $P<0.001$ ) and fasciotomies (67% vs 30%  $P=0.002$ ) when compared to civilian burn mechanisms(98).

Additionally, the requirement for post-operative support and rehabilitation add to the resource requirements. Children are rarely left without functional sequelae, with limited joint mobility and impaired tactile sensation presenting significant future challenges for rehabilitation(103), while high rates of psychological morbidity including suicidal ideation have been reported in adolescents(104). Under-resourcing psychological and functional rehabilitation will likely lead to high rates of morbidity and mortality(102). The degree to which these services are available within conflict zones and LMICs is uncertain. Ethical questions naturally arise when performing interventions where health systems are unlikely to address a child's long term needs. Examination of existing paediatric burn services within zones of interest and longer term follow up of paediatric blast burn patients are required to determine the problems and needs for this cohort.

### Service provision

Relative to total admissions, paediatric victims affected by blasts constitute a disproportionately large resource burden on operative workload, as well as intensive care and hospital beds. Approximately 47-82% of paediatric blast victims require surgery(22,33,36,58,61), particularly adolescents(22). The requirement for multiple operative procedures were common in the paediatric cohort, especially in burn and orthopaedic surgery due to the requirement for surgical revision (34-80% of children required  $\geq 2$  procedures(16,18,36,38-40,42,54); 25% required  $\geq 4$  procedures)(16). Operative requirement was greatest in 9-14 year olds, requiring on average 5 procedures per patient, prolonged ICU and hospital stay, while 0-3 year olds required the least operative management(20). This study suggested the reduced requirement for operative input in 0-3 year olds may be due not only to the reduced burden of extremity injuries requiring repeated debridement, but potentially because the equipment was inappropriate for this young cohort. This is supported by observations that infants and young children aged 0-10 years old with an Injury Severity Score  $\geq 15$  were 4x less likely to go to surgery compared to adults, while adolescents (11-15 years) were 2x more likely to receive operative input(22).

Multidisciplinary surgical services were required in 80% of patients, with orthopaedic, plastic, general neurosurgical, ophthalmic and vascular surgeons often working in partnership(48). Debridement and primary skin closure represented the most common procedure, in 35-100% of studies(25,29,36-38,47,58,68), in keeping with shrapnel injuries leading to multiple and

1  
2  
3 frequently contaminated superficial injuries(29,47). Children are likely to do well with thorough  
4 debridement, with well perfused tissues allowing optimal healing and scar formation(39,94).  
5  
6

7 Retrospective studies of US military medical treatment facilities (MTF) in Afghanistan have  
8 found that while children comprised only 3-6% of their total admissions, this demographic  
9 required approximately double the total bed spaces (7-11%)(14,19,53), and on average 3x the  
10 length of stay (LOS) of coalition troops admitted over the same time period(14,68).  
11 Approximately 40% of paediatric admissions required a LOS exceeding 7 days, while, in half  
12 , the LOS exceeded 14 days(10,33). Spinella et al noted that while children aged 11-17 were  
13 the greatest proportion of children occupying beds, <1 year old cohort had the longest  
14 stay(68). This contrasts with other studies finding young children <8 years old had the shortest  
15 LOS, while children(8-14 years old) had the longest(14,18).  
16  
17  
18  
19  
20  
21

22 A similar burden is observed in the intensive care unit (ICU), with between 20-45% children  
23 requiring ICU admission(5,30,33,36,43,50,53,54,61), the majority following explosive or  
24 ballistic trauma. Children were often younger (0-10 years old)(22), with one recent study noting  
25 children aged <1 year and 1-4 years most often requiring admission (53 & 66%  
26 respectively)(30). Children under 8 required a ICU LOS over twice that of children aged >8  
27 years (52). Harris et al(5) noted that despite representing only 12% of admissions, children  
28 occupied on average 35% of ICU beds, with a brief surge in numbers resulting in 100%  
29 occupancy from children, the majority requiring ventilatory and ionotropic support. This  
30 specialised service was often provided by non-paediatric experts, which could result in 2  
31 healthcare providers per paediatric patient(5). Ventilatory equipment is often age specific, and  
32 although multiple examples of ingenuity and adaptation of adult equipment exist(5,54),  
33 children may overwhelm the unprepared MTF.  
34  
35  
36  
37  
38  
39  
40  
41

42 One of the key challenges is providing sustainable health services in the host country. MTFs  
43 may be capable of delivering exceptional paediatric care in the acute phase following blasts,  
44 but recovery from morbidity is dependent on long term rehabilitation(94) normally provided by  
45 the host country. Not only can this place exceptional strain on local health authorities, but if  
46 provisions are not available, the child is likely to undergo a protracted decline(5,94).  
47  
48  
49  
50

51 Reasons for the high rate of admission and prolonged stay may be multifactorial. Admission  
52 criteria for host nationals to a coalition MTF typically require threat to life, limb, or eyesight,  
53 with resulting prolonged stay. Interestingly however, children with mild to moderate traumata  
54 are three times more likely than adults to be admitted (22). This may reflect a lack of certainty  
55 in initial assessment of injury severity from health practitioners unaccustomed to dealing with  
56 children. Within conflict zones, rearwards evacuation of civilians is not always possible, and  
57  
58  
59  
60

1  
2  
3 health interventions such as ventilatory support may not be sustainable by host countries  
4 without deterioration in service standards, leading to prolonged admission until the child can  
5 be safely moved(5).  
6  
7

8  
9 Following up recovery is a recurring theme when exploring long term challenges of blast  
10 injuries in children(6). Children are a complex cohort to monitor. Geographical displacement,  
11 particularly in the context of a conflict, increases the likelihood of this vulnerable cohort being  
12 lost to follow-up. This can impact not only the child's rehabilitation and coordination with local  
13 health authorities, but also cause difficulty in assessing long-term functional outcomes which  
14 are needed to detect future health needs. Increasingly there is recognition of the need for  
15 formalised trauma registries accessible in the host country, assisting the follow-up of this  
16 vulnerable demographic(6,18,19,53).  
17  
18  
19  
20  
21  
22

## 23 **Conclusion**

24  
25  
26 Apart from their focus on paediatric blast, all the papers in this review have one thing in  
27 common. Their research is based on those child patients injured by blast in conflict zones,  
28 post-conflict zones and low resource environments. Most paediatric blast injury is inflicted in  
29 these settings but is not exclusive to them. In Britain in May 2017, a bomb detonated at the  
30 Manchester Arena killing 23 people and injuring 139, most of whom were children. The attack  
31 placed a sudden and significant burden on medical services in the city, which had no  
32 experience of paediatric blast injury in the 21<sup>st</sup> century, let alone on this kind of scale.  
33  
34  
35  
36

37  
38 Wherever in the world they live, and whatever the circumstances of the explosion, the social  
39 and anatomical profile of children makes them uniquely vulnerable to one of the most complex  
40 and demanding trauma conditions that any medical professional or system can treat. This  
41 paper has characterised paediatric blast as a diverse injury pattern, which must be seen as  
42 distinct from its adult equivalent. This pattern should be fully understood from point of  
43 wounding through the post-operative and rehabilitation phases of treatment. This continuum  
44 approach would enable both better long-term care of the patient, and improved support of  
45 medical systems bearing the intense burden of that care.  
46  
47  
48  
49  
50

51  
52 It remains to be seen whether the monitoring of the long term effects of paediatric blast injury  
53 in well-resourced environments is any better than that in areas of instability. Monitoring of  
54 patient outcomes should be integrated with the monitoring of treatment so that relevant  
55 practice and skills can be continually assessed. It is urgent that the understanding of  
56 paediatric blast injury is given focus and structure, not just for the likely significant patient  
57  
58  
59  
60

1  
2  
3 cohort of the future but for those suffering today as blast injured children surviving into blast-  
4 blighted adulthood, wherever they live in the world.  
5  
6  
7  
8  
9  
10  
11  
12  
13  
14  
15  
16  
17

### 18 **References**

- 20 1. Frost A, Boyle P, Autier P, King C, Zwijnenburg W, Hewitson D, et al. Articles The  
21 effect of explosive remnants of war on global public health: a systematic mixed-  
22 studies review using narrative synthesis. *Lancet Public Heal*. 2017;2(2):e286–96.  
23
- 24 2. Wolf SJ, Bebartha VS, Bonnett CJ, Pons PT, Cantrill S V. Blast injuries. *Lancet*. 2009  
25 Aug;374(9687):405–15.  
26
- 27 3. Champion HR, Holcomb JB, Young LA. Injuries from explosions: physics, biophysics,  
28 pathology, and required research focus. *J Trauma*. 2009;66(May):1468–1477;  
29 discussion 1477.  
30
- 31 4. UNICEF. United Nations Convention on the Rights of the Child [Internet]. 1989 [cited  
32 2017 Sep 1]. Available from: [https://downloads.unicef.org.uk/wp-](https://downloads.unicef.org.uk/wp-content/uploads/2010/05/UNCRC_united_nations_convention_on_the_rights_of_the_child.pdf?_ga=2.85767705.181858325.1504263661-1041319099.1504263661)  
33 [content/uploads/2010/05/UNCRC\\_united\\_nations\\_convention\\_on\\_the\\_rights\\_of\\_the\\_](https://downloads.unicef.org.uk/wp-content/uploads/2010/05/UNCRC_united_nations_convention_on_the_rights_of_the_child.pdf?_ga=2.85767705.181858325.1504263661-1041319099.1504263661)  
34 [child.pdf?\\_ga=2.85767705.181858325.1504263661-1041319099.1504263661](https://downloads.unicef.org.uk/wp-content/uploads/2010/05/UNCRC_united_nations_convention_on_the_rights_of_the_child.pdf?_ga=2.85767705.181858325.1504263661-1041319099.1504263661)  
35
- 36 5. Harris CC, McNicholas JJ. Paediatric intensive care in the field hospital. *J R Army*  
37 *Med Corps*. 2009;155(2):157–9.  
38
- 39 6. Bull A, Mayhew E, Reavley P, Tai N, Taylor S. Comment Paediatric blast injury :  
40 challenges and priorities. *Lancet child Adolesc Heal*. 2018;4642(18):20–1.  
41
- 42 7. Bree S, Wood K, Nordmann GR, Mcnicholas J. The Paediatric Transfusion Challenge  
43 on Deployed Operations. 156.  
44
- 45 8. Diana G, Msn R, Sally K, Singh T. Using System Change as a Method of  
46 Performance / Quality Improvement ... 2010;  
47
- 48 9. Aharonson-Daniel L, Waisman Y, Dannon YL, Peleg K. Epidemiology of Terror-  
49 Related Versus Non-Terror-Related Traumatic Injury in Children. *Pediatrics*. 2003  
50  
51  
52  
53  
54  
55  
56  
57  
58  
59  
60

- 1  
2  
3 Oct;112(4):e280–e280.  
4  
5  
6 10. Aharonson-Daniel L, Klein Y, Peleg K. Suicide bombers form a new injury profile. *Ann*  
7 *Surg.* 2006 Dec;244(6):1018–23.  
8  
9  
10 11. Amir LD, Aharonson-Daniel L, Peleg K, Waisman Y, Alfici R, Ishtov E, et al. The  
11 severity of injury in children resulting from acts against civilian populations. *Ann Surg.*  
12 2005 Apr;241(4):666–70.  
13  
14 12. Bilukha OO, Leidman EZ, Sultan A-SSSS, Jaffar Hussain S. Deaths due to Intentional  
15 Explosions in Selected Governorates of Iraq from 2010 to 2013: Prospective  
16 Surveillance. *Prehosp Disaster Med.* 2015 Dec 30;30(6):586–92.  
17  
18 13. Bitterman Y, Benov A, Glassberg E, Satanovsky A, Bader T, Sagi R, et al. Role 1  
19 Pediatric Trauma Care on the Israeli-Syrian Border-First Year of the Humanitarian  
20 Effort. *Mil Med.* 2016 Aug;181(8):849–53.  
21  
22 14. Borgman M, Matos RI, Blackbourne LH, Spinella PC. Ten years of military pediatric  
23 care in Afghanistan and Iraq. *J Trauma Acute Care Surg.* 2012 Dec;73(6 SUPPL.  
24 5):S509–13.  
25  
26 15. Borgman MA, Matos RI, Spinella PC. Isolated pediatric burn injury in Iraq and  
27 Afghanistan. *Pediatr Crit Care Med.* 2015;16(2):e23–7.  
28  
29 16. Creamer KM, Edwards MJ, Shields CH, Thompson MW, Yu CE, Adelman W.  
30 Pediatric Wartime Admissions to US Military Combat Support Hospitals in Afghanistan  
31 and Iraq: Learning from the First 2,000 Admissions. *J Trauma - Inj Infect Crit Care.*  
32 2009 Oct;67(4):762–8.  
33  
34 17. Dua A, Via KC, Kreishman P, Kragh JF, Spinella PC, Patel B, et al. Early  
35 management of pediatric vascular injuries through humanitarian surgical care during  
36 U.S. military operations. In: *Journal of Vascular Surgery.* 2013. p. 695–700.  
37  
38 18. Edwards MJ, Lustik M, Eichelberger MR, Elster E, Azarow K, Coppola C. Blast injury  
39 in children: an analysis from Afghanistan and Iraq, 2002-2010. *J Trauma Acute Care*  
40 *Surg.* 2012 Nov;73(5):1278–83.  
41  
42 19. Edwards MJ, Lustik M, Burnett MW, Eichelberger M. Pediatric inpatient humanitarian  
43 care in combat: Iraq and Afghanistan 2002 to 2012. *J Am Coll Surg.*  
44 2014;218(5):1018–23.  
45  
46 20. Edwards MJ, Lustik M, Carlson T, Tabak B, Farmer D, Edwards K, et al. Surgical  
47 interventions for pediatric blast injury: an analysis from Afghanistan and Iraq 2002 to  
48  
49  
50  
51  
52  
53  
54  
55  
56  
57  
58  
59  
60



- 1  
2  
3 2010. *J Trauma Acute Care Surg.* 2014 Mar;76(3):854–8.  
4  
5 21. Hillman CM, Rickard A, Rawlins M, Smith JE. Paediatric traumatic cardiac arrest:  
6 Data from the joint theatre trauma registry. *J R Army Med Corps.* 2016  
7 Aug;162(4):276–9.  
8  
9  
10 22. Jaffe DH, Peleg K. Terror explosive injuries: a comparison of children, adolescents,  
11 and adults. *Ann Surg.* 2010 Jan;251(1):138–43.  
12  
13 23. Khan I, Khan N, Naeem R, Kerai S, Allen K, Zia N, et al. Bomb blast injuries: an  
14 exploration of patient characteristics and outcome using Pakistan National Emergency  
15 Departments Surveillance (Pak-NEDS) data. *BMC Emerg Med.* 2015;15 Suppl 2:S7.  
16  
17 24. Kluger Y, Peleg K, Daniel-Aharonson L, Mayo A. The special injury pattern in terrorist  
18 bombings. *J Am Coll Surg.* 2004;199(6):875–9.  
19  
20 25. Mckechnie PS, Wertin T, Parker P, Eckert M. Pediatric Surgery Skill Sets in Role 3:  
21 The Afghanistan Experience. *Mil Med.* 2014 Jul;179(7):762–5.  
22  
23 26. Naylor JF, April MD, Roper JL, Hill GJ, Clark P, Schauer SG. Emergency department  
24 imaging of pediatric trauma patients during combat operations in Iraq and  
25 Afghanistan. 2018;620–5.  
26  
27 27. Neff LP, Cannon JW, Morrison JJ, Edwards MJ, Spinella PC, Borgman MA, et al.  
28 Clearly defining pediatric massive transfusion: cutting through the fog and friction with  
29 combat data. *J Trauma Acute Care Surg.* 2015;78(1):22-8; discussion 28-9.  
30  
31 28. Patregnani JT, Borgman MA, Maegele M, Wade CE, Blackbourne LH, Spinella PC.  
32 Coagulopathy and shock on admission is associated with mortality for children with  
33 traumatic injuries at combat support hospitals. *Pediatr Crit Care Med.*  
34 2012;13(3):273–7.  
35  
36 29. Quintana DA, Jordan FB, Tuggle DW, Mantor PC, Tunell WP, Parker JR, et al. The  
37 spectrum of pediatric injuries after a bomb blast. *J Pediatr Surg.* 1997 Feb;32(2):307–  
38 11.  
39  
40 30. Schauer SG, Hill GJ, Naylor JF, April MD, Borgman M, Bebart VS. Emergency  
41 department resuscitation of pediatric trauma patients in Iraq and Afghanistan. *Am J*  
42 *Emerg Med.* 2018 Jan;1–5.  
43  
44 31. Smith JEE, Kehoe A, Harrison SEE, Russell R, Midwinter M. Outcome of penetrating  
45 intracranial injuries in a military setting. *Injury.* 2014 May;45(5):874–8.  
46  
47 32. Villamaria CY, Morrison JJ, Fitzpatrick CM, Cannon JW, Rasmussen TE. Wartime  
48  
49  
50  
51  
52  
53  
54  
55  
56  
57  
58  
59  
60

- 1  
2  
3 vascular injuries in the pediatric population of Iraq and Afghanistan: 2002-2011. *J*  
4 *Pediatr Surg*. 2014 Mar;49(3):428–32.  
5  
6  
7 33. Waisman Y, Aharonson-Daniel L, Mor M, Amir L, Peleg K. The impact of terrorism on  
8 children: a two-year experience. *Prehospital Disaster Med*. 2003;18(3):242–8.  
9  
10  
11 34. Woods KL, Russell RJ, Bree S, Mahoney PF, McNicholas J. The pattern of paediatric  
12 trauma on operations. *J R Army Med Corps*. 2012 Mar;158(1):34–7.  
13  
14 35. Al-Worikat AF. Landmine amputees referred to the Royal Medical Services-Jordan.  
15 *Prosthet Orthot Int*. 2001 Aug;25(2):108–12.  
16  
17  
18 36. Arul GS, Reynolds J, DiRusso S, Scott A, Bree S, Templeton P, et al. Paediatric  
19 admissions to the British military hospital at Camp Bastion, Afghanistan. *Ann R Coll*  
20 *Surg Engl*. 2012 Mar;94(1):52–7.  
21  
22  
23 37. Bajec J, Gang RK, Lari AR. Post Gulf war explosive injuries in liberated Kuwait. *Injury*.  
24 1993 Sep;24(8):517–20.  
25  
26  
27 38. Beitler AL, Wortmann GW, Hofmann LJ, Goff Jr JM. Operation Enduring Freedom: the  
28 48th Combat Support Hospital in Afghanistan. *Mil Med*. 2006;171(3):189–93.  
29  
30  
31 39. Bertani A, Mathieu L, Dahan J-L, Launay F, Rongieras F, Rigal S. War-related  
32 extremity injuries in children: 89 cases managed in a combat support hospital in  
33 Afghanistan. *Orthop Traumatol Surg Res*. 2015 May;101(3):365–8.  
34  
35  
36 40. C.P. C, B.E. L, T.E. R. Children treated at an expeditionary military hospital in Iraq.  
37 *Arch Pediatr Adolesc Med*. 2006;160(9):972–6.  
38  
39  
40 41. Can M, Yildirimcan H, Ozkalipci O, Melek M, Edirne Y, Bicer U, et al. Landmine  
41 associated injuries in children in Turkey. *J Forensic Leg Med*. 2009 Nov;16(8):464–8.  
42  
43  
44 42. El H, Agard E, Dot C. Cephalic region war injuries in children : Experience in French  
45 NATO hospital in Kabul Afghanistan. *Injury*. 2018;49(9):1703–5.  
46  
47  
48 43. Er E, Kerem Ş, Güler S, Aslan Ş, Seviner M, Aksel G, et al. American Journal of  
49 *Emergency Medicine Analyses of demographical and injury characteristics of adult*  
50 *and pediatric patients injured in Syrian civil war ☆*. 2017;35:82–6.  
51  
52  
53 44. Fares Y, Ayoub F, Fares J, Khazim R, Khazim M, Gebeily S. Pain and neurological  
54 sequelae of cluster munitions on children and adolescents in South Lebanon. *Neurol*  
55 *Sci*. 2013 Nov 7;34(11):1971–6.  
56  
57  
58 45. Fares Y, Fares J, Gebeily S. Head and facial injuries due to cluster munitions. *Neurol*  
59  
60

- 1  
2  
3  
4  
5  
6  
7  
8  
9  
10  
11  
12  
13  
14  
15  
16  
17  
18  
19  
20  
21  
22  
23  
24  
25  
26  
27  
28  
29  
30  
31  
32  
33  
34  
35  
36  
37  
38  
39  
40  
41  
42  
43  
44  
45  
46  
47  
48  
49  
50  
51  
52  
53  
54  
55  
56  
57  
58  
59  
60
- Sci. 2014 Jun;35(6):905–10.
46. Gurney I. Paediatric casualties during OP TELIC. *J R Army Med Corps.* 2004;150(4):270–2.
47. Hinsley DE, Rosell PAE, Rowlands TK, Clasper JC. Penetrating missile injuries during asymmetric warfare in the 2003 Gulf conflict. *Br J Surg.* 2005 May;92(5):637–42.
48. Hodalic Z, Svagelj M, Sebalj I, Sebalj D. Surgical treatment of 1,211 patients at the Vinkovci General Hospital, Vinkovci, Croatia, during the 1991-1992 Serbian offensive in east Slavonia. *Mil Med.* 1999 Nov;164(11):803–8.
49. Inwald DP, Arul GS, Montgomery M, Henning J, McNicholas J, Bree S. Management of children in the deployed intensive care unit at Camp Bastion, Afghanistan. *J R Army Med Corps.* 2014 Sep;160(3):236–40.
50. Jeevaratnam JA, Pandya AN. One year of burns at a role 3 medical treatment facility in Afghanistan. *J R Army Med Corps.* 2014 Mar;160(1):22–6.
51. Klimo P, Ragel BT, Scott WH, McCafferty R. Pediatric neurosurgery during Operation Enduring Freedom. *J Neurosurg Pediatr.* 2010 Aug;6(2):107–14.
52. RI M, JB H, Callahan C, PC S. Increased mortality rates of young children with traumatic injuries at a US Army combat support hospital in Baghdad, Iraq, 2004. *Pediatrics.* 2008;122(5):e959-66.
53. McGuigan R, Spinella PC, Beekley A, Sebesta J, Perkins J, Grathwohl K, et al. Pediatric trauma: experience of a combat support hospital in Iraq. *J Pediatr Surg.* 2007 Jan;42(1):207–10.
54. Nordmann GR. Paediatric anaesthesia in Afghanistan: a review of the current experience. *J R Army Med Corps.* 2010 Dec;156(4 Suppl 1):323–6.
55. Pannell D, Poynter J, Wales PW, Tien H, Nathens AB, Shellington D. Factors affecting mortality of pediatric trauma patients encountered in Kandahar, Afghanistan. *Can J Surg.* 2015 Jun;58(3):S141–5.
56. Pearce P. Preparing to care for paediatric trauma patients. *J R Army Med Corps.* 2015;161(Suppl 1):i52–5.
57. Terzić J, Mestrovic J, Dogas Z, Furlan D, Biocic M. Children war casualties during the 1991-1995 wars in Croatia and Bosnia and Herzegovina. *Croat Med J.* 2001;42(2):156–60.

- 1
  - 2
  - 3
  - 4
  - 5
  - 6
  - 7
  - 8
  - 9
  - 10
  - 11
  - 12
  - 13
  - 14
  - 15
  - 16
  - 17
  - 18
  - 19
  - 20
  - 21
  - 22
  - 23
  - 24
  - 25
  - 26
  - 27
  - 28
  - 29
  - 30
  - 31
  - 32
  - 33
  - 34
  - 35
  - 36
  - 37
  - 38
  - 39
  - 40
  - 41
  - 42
  - 43
  - 44
  - 45
  - 46
  - 47
  - 48
  - 49
  - 50
  - 51
  - 52
  - 53
  - 54
  - 55
  - 56
  - 57
  - 58
  - 59
  - 60
58. Thompson DC, Crooks RJ, Clasper JC, Lupu A, Stapley SA, Cloke DJ. The pattern of paediatric blast injury in Afghanistan. *J R Army Med Corps*. 2017 Oct;
59. Walker N, Russell RJ, Hodgetts TJ. British Military Experience of Pre-Hospital Paediatric Trauma in Afghanistan. *156(3):150–3*.
60. Armed US. Pediatric Trauma Experience in a Combat Support Hospital in Eastern Afghanistan Over 10 Months , 2010 to 2011. 2013;
61. Arafat S, Alsabek MB, Ahmad M, Hamo I, Munder E. Penetrating abdominal injuries during the Syrian war: Patterns and factors affecting mortality rates. *Injury*. 2017 May;48(5):1054–7.
62. Bendinelli C. Effects of land mines and unexploded ordnance on the pediatric population and comparison with adults in rural Cambodia. *World J Surg*. 2009 May 16;33(5):1070–4.
63. Celikel A, Karaarslan B, Demirkiran DS, Zeren C, Arslan MM. A series of civilian fatalities during the war in Syria. *Ulus Travma Acil Cerrahi Derg*. 2014 Sep;20(5):338–42.
64. Celikel A, Karbeyaz K, Kararslan B, Arslan MM, Zeren C. Childhood casualties during civil war: Syrian experience. *J Forensic Leg Med*. 2015 Aug;34:1–4.
65. Gataa ISS, Muassa QHH. Patterns of maxillofacial injuries caused by terrorist attacks in Iraq: Retrospective study. *Int J Oral Maxillofac Surg*. 2011 Jan;40(1):65–70.
66. Hanevik K, Kvåle G. Landmine injuries in Eritrea. 1992;1992.
67. Mirza FH, Parhyar HA, Tirmizi SZA. Rising threat of terrorist bomb blasts in Karachi--a 5-year study. *J Forensic Leg Med*. 2013 Aug;20(6):747–51.
68. Spinella PC, Borgman MA, Azarow KS. Pediatric trauma in an austere combat environment. *Crit Care Med*. 2008;36(7 Suppl):S293–6.
69. Andersson N, da Sousa CP, Paredes S. Social cost of land mines in four countries: Afghanistan, Bosnia, Cambodia, and Mozambique. *BMJ*. 1995 Sep;311(7007):718–21.
70. Bilukha OO, Brennan M, Woodruff BA. Death and Injury from Landmines and Unexploded Ordnance in Afghanistan. *J Am Med Assoc*. 2003 Aug 6;290(5):650–3.
71. Bilukha OO, Brennan M, Anderson M, Tsitsaev Z, Murtazaeva E, Ibragimov R. Seen but not heard: Injuries and deaths from landmines and unexploded ordnance in

- 1  
2  
3 Chechnya, 1994-2005. *Prehosp Disaster Med.* 2007;22(6):507-12.  
4  
5  
6 72. Bilukha OO, Brennan M, Anderson M. The lasting legacy of war: Epidemiology of  
7 injuries from landmines and unexploded ordnance in Afghanistan, 2002-2006.  
8 *Prehosp Disaster Med.* 2008;23(6):493-9.  
9  
10  
11 73. Bilukha OO, Laurence H, Danee L, Subedi KP, Becknell K. Injuries and deaths due to  
12 victim-activated improvised explosive devices, landmines and other explosive  
13 remnants of war in Nepal. *Inj Prev.* 2011 Oct 1;17(5):326-31.  
14  
15  
16 74. Bilukha OO, Becknell K, Laurence H, Danee L, Subedi KP. Fatal and non-fatal  
17 injuries due to intentional explosions in Nepal, 2008-2011: Analysis of surveillance  
18 data. *Confl Health.* 2013;7(1):5.  
19  
20  
21 75. Guerriero RM, Pier DB, de Gusmao CM, Bernson-Leung ME, Maski KP, Urion DK, et  
22 al. Increased pediatric functional neurological symptom disorders after the Boston  
23 marathon bombings: a case series. *Pediatr Neurol.* 2014 Nov;51(5):619-23.  
24  
25  
26 76. Guha-Sapir D, Schluter B, Rodriguez-Llanes JM, Lillywhite L, Hicks MH-R. Patterns of  
27 civilian and child deaths due to war-related violence in Syria: a comparative analysis  
28 from the Violation Documentation Center dataset, 2011-16. *Lancet Glob Heal.* 2018  
29 Jan;6(1):e103-10.  
30  
31  
32  
33  
34 77. Hemmati MA, Shokoohi H, Masoumi M, Khateri S, Soroush M, Modirian E, et al.  
35 Mental health disorders in child and adolescent survivors of post-war landmine  
36 explosions. *Mil Med Res.* 2015;2:30.  
37  
38  
39 78. Kinra S, Black ME. Landmine related injuries in children of Bosnia and Herzegovina  
40 1991-2000: comparisons with adults. *J Epidemiol Community Health.* 2003  
41 Apr;57(4):264-5.  
42  
43  
44  
45 79. Mousavi B, Soroush MMRM, Masoumi M, Khateri S, Modirian E, Shokoohi H, et al.  
46 Epidemiological study of child casualties of landmines and unexploded ordnances: A  
47 national study from Iran. *Prehosp Disaster Med.* 2015 Oct 16;30(5):472-7.  
48  
49  
50 80. Pat-horenczyk R, Abramovitz R, Brom D, Chemtob CM. Adolescent Exposure to  
51 Recurrent Terrorism in Israel : Posttraumatic Distress and Functional Impairment.  
52 2007;77(1):76-85.  
53  
54  
55 81. Poor Zamany Nejatkermany M, Modirian E, Soroush M, Masoumi M, Hosseini M.  
56 Phantom Limb Sensation (PLS) and Phantom Limb Pain (PLP) among Young  
57 Landmine Amputees. *Iran J child Neurol.* 2016;10(3):42-7.  
58  
59  
60

- 1
  - 2
  - 3
  - 4
  - 5
  - 6
  - 7
  - 8
  - 9
  - 10
  - 11
  - 12
  - 13
  - 14
  - 15
  - 16
  - 17
  - 18
  - 19
  - 20
  - 21
  - 22
  - 23
  - 24
  - 25
  - 26
  - 27
  - 28
  - 29
  - 30
  - 31
  - 32
  - 33
  - 34
  - 35
  - 36
  - 37
  - 38
  - 39
  - 40
  - 41
  - 42
  - 43
  - 44
  - 45
  - 46
  - 47
  - 48
  - 49
  - 50
  - 51
  - 52
  - 53
  - 54
  - 55
  - 56
  - 57
  - 58
  - 59
  - 60
82. Guha-Sapir D, Rodriguez-Llanes JM, Hicks MH, Donneau AF, Coutts A, Lillywhite L, et al. Civilian deaths from weapons used in the Syrian conflict. *BMJ*. 2015;351(April 2014):1–5.
83. Surrency AB, Graitcer PL, Henderson AK. Key factors for civilian injuries and deaths from exploding landmines and ordnance. *Inj Prev*. 2007 Jun;13(3):197–201.
84. Watts HG. The consequences for children of explosive remnants of war: Land mines, unexploded ordnance, improvised explosive devices, and cluster bombs. *J Pediatr Rehabil Med*. 2009;2(3):217–27.
85. Edwards MJ, Lustik M, Eichelberger MR, Elster E, Azarow K, Coppola C. Blast injury in children. *J Trauma Acute Care Surg*. 2012 Nov;73(5):1278–83.
86. Regional K, Regional O, Florida I. Comparison of Outcomes for Pediatric Trauma at Different Types of Trauma Centers : The Unresolved Mystery. 2016;1054–8.
87. Owens BD, Kragh JF, Wenke JC, Macaitis J, Wade CE, Holcomb JB. Combat wounds in operation Iraqi Freedom and operation Enduring Freedom. *J Trauma*. 2008;64(2):295–9.
88. Eastridge BJ, Salinas J, Ph D, Wade CE, Ph D, Blackburne LH. Hypotension is 100 mm Hg on the battlefield. *AJS*. 2011;202(4):404–8.
89. Shuker ST. Effect of biomechanism mine explosion on children: Craniofacial injuries and management. *J Craniofac Surg*. 2013 Jul;24(4):1132–6.
90. Coupland RM, Korver A. Injuries from antipersonnel mines: the experience of the International Committee of the Red Cross. *BMJ (Clinical Res Ed)*. 1991;303(6816):1509–12.
91. Rosenfeld J V., Ford NL. Bomb blast, mild traumatic brain injury and psychiatric morbidity: A review. Vol. 41, *Injury*. 2010. p. 437–43.
92. Ramasamy A, Hinsley DE, Edwards DS, Stewart MPM, Midwinter M, Parker PJ. Skill sets and competencies for the modern military surgeon : Lessons from UK military operations in Southern Afghanistan. *Injury*. 2010;41(5):453–9.
93. Franke A, Hentsch S, Bieler D, Schilling T, Weber W, Johann M, et al. Management of Soft-Tissue and Bone Defects in a Local Population: Plastic and Reconstructive Surgery in a Deployed Military Setting. *Mil Med*. 2017 Nov;182(11):e2010–20.
94. Nordmann GR, McNicholas JJ, Templeton PA, Arul S, Woods K. Paediatric trauma management on deployment. *J R Army Med Corps*. 2011;157(3 SUPP. 1).

- 1  
2  
3 95. Eichelberger MR. Pediatric surgery and medicine for hostile environments. Vol. 46,  
4 Journal of Pediatric Surgery. 2011. 1683 p.  
5
- 6  
7 96. Article O. The Experience of Phantom Limb Pain in Patients With Combat-Related  
8 Traumatic Amputations. 2008;  
9
- 10  
11 97. Cummings D. Prosthetics in the developing world: a review of the literature. Prosthet  
12 Orthot Int. 1996;20:51–60.  
13
- 14  
15 98. Buyukbese S, Budeyri A. ScienceDirect Mortality risk factors in war-related pediatric  
16 burns : A comparative study among two distinct populations. Burns. 2018;1–18.  
17
- 18  
19 99. Peleg K, Aharonson-Daniel L, Michael M, Shapira SC, Michaelson M, Rivkind A, et al.  
20 Patterns of injury in hospitalized terrorist victims. Am J Emerg Med. 2003;21(4):258–  
21 62.  
22
- 23  
24 100. Kauvar DS, Wolf SE, Wade CE, Cancio LC, Renz EM, Holcomb JB. Burns sustained  
25 in combat explosions in Operations Iraqi and Enduring Freedom (OIF/OEF explosion  
26 burns). Burns. 2006;32(7):853–7.  
27
- 28  
29 101. Sharma RK, Parashar A. Special considerations in paediatric burn patients. Indian J  
30 Plast Surg. 2010;43:S43-50.  
31
- 32  
33 102. Stewart BT, Trelles M, Dominguez L, Wong E, Fiozounam HT, Hassani GH, et al.  
34 Surgical burn care by médecins sans frontières-operations center Brussels: 2008 to  
35 2014. J Burn Care Res. 2016;37(6):e519–24.  
36
- 37  
38 103. Zeitlin REK, Järnberg J, Somppi EJ, Sundell B. Long-term functional sequelae after  
39 paediatric burns. Burns. 1998;24(1):3–6.  
40
- 41  
42 104. Gautam S, Gupta ID, Batra L, Sharma H, Khandelwal R, Pant A. Psychiatric morbidity  
43 among victims of bomb blast. Indian J Psychiatry. 1998 Jan;40(1):41–5.  
44  
45  
46  
47  
48  
49  
50  
51  
52  
53  
54  
55  
56  
57  
58  
59  
60

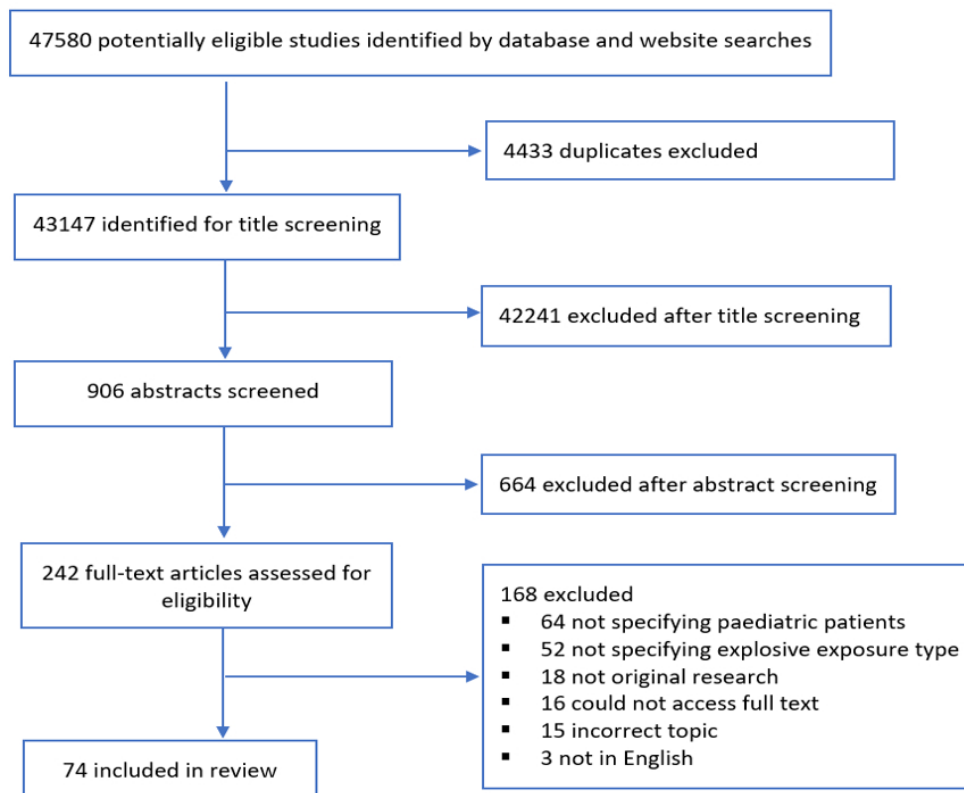



1  
2  
3  
4  
5  
6  
7  
8  
9  
10  
11  
12  
13  
14  
15  
16  
17  
18  
19  
20  
21  
22  
23  
24  
25  
26  
27  
28  
29  
30  
31  
32  
33  
34  
35  
36  
37  
38  
39  
40  
41  
42  
43  
44  
45  
46  
47  
48  
49  
50  
51  
52  
53  
54  
55  
56  
57  
58  
59  
60

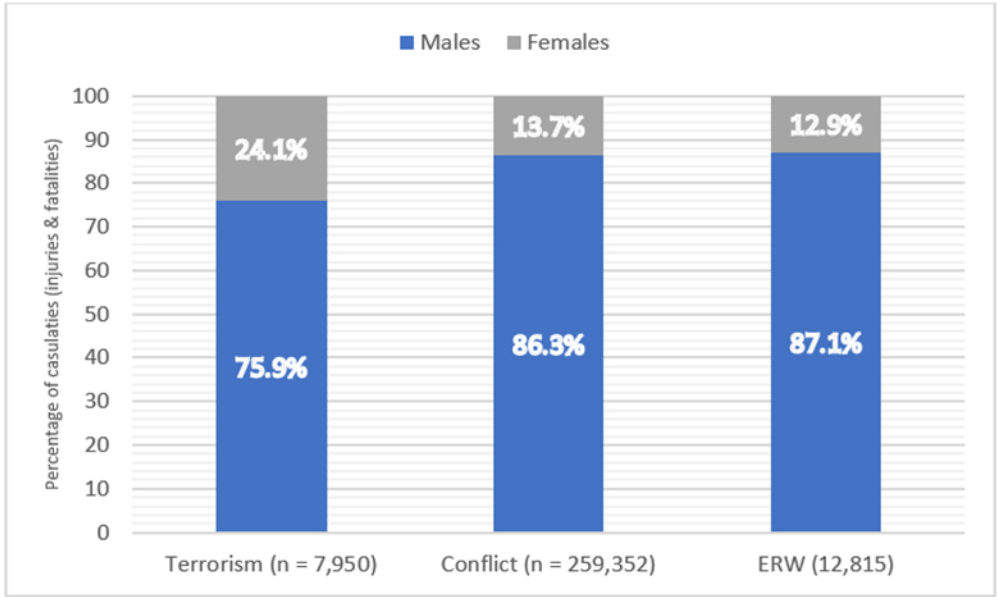

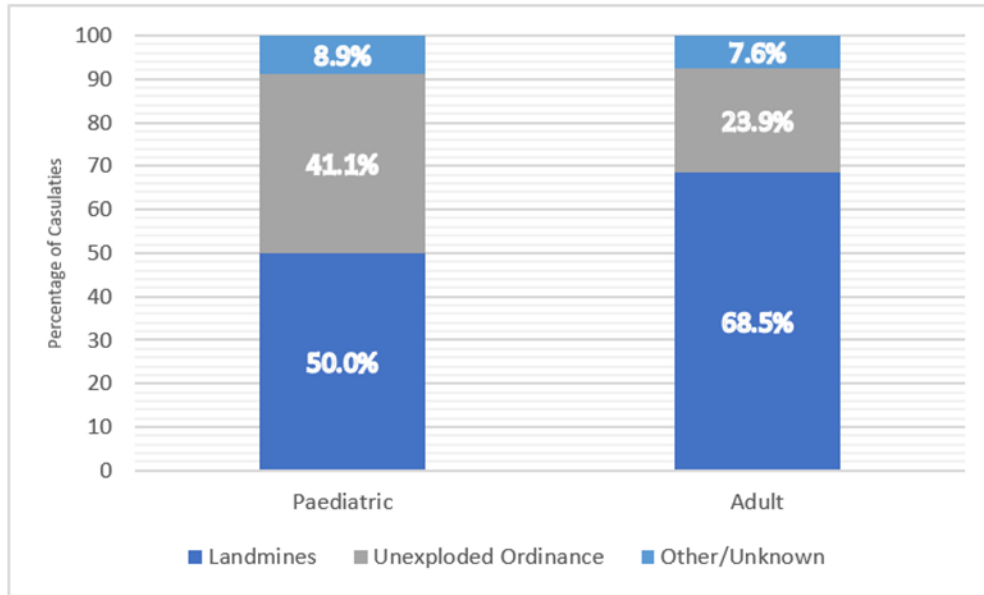

# BMJ Paediatrics Open

## **Blast Injuries in Children: a mixed-methods narrative review.**

|                               |                                                                                                                                                                                                                                                          |
|-------------------------------|----------------------------------------------------------------------------------------------------------------------------------------------------------------------------------------------------------------------------------------------------------|
| Journal:                      | <i>BMJ Paediatrics Open</i>                                                                                                                                                                                                                              |
| Manuscript ID                 | bmjpo-2019-000452.R2                                                                                                                                                                                                                                     |
| Article Type:                 | Review                                                                                                                                                                                                                                                   |
| Date Submitted by the Author: | 04-Jun-2019                                                                                                                                                                                                                                              |
| Complete List of Authors:     | Milwood Hargrave, John; Bioengineering<br>Bull, Anthony; Dept of Bioengineering<br>Pearce, Phillip; Dept of Bioengineering<br>Mayhew, Emily; Imperial College London, Bioengineering<br>Taylor, Sebastian; Royal College of Paediatrics and Child Health |
| Keywords:                     | Paediatric Practice, Paediatric Surgery, Accident & Emergency, General Paediatrics                                                                                                                                                                       |
|                               |                                                                                                                                                                                                                                                          |

SCHOLARONE™  
Manuscripts

1  
2  
3 Title:

4  
5 ***Blast injuries in children: a mixed-methods narrative review***  
6  
7

8 Authors:

9  
10 J.F.S. Millwood Hargrave, A.P. Pearce, E.R. Mayhew, A.M.J. Bull  
11  
12

13  
14 Corresponding author:

15 Emily Mayhew

16 Dept. of Bioengineering, Imperial College London

17 Queensgate

18 London SW7 2AZ

19 Tel: 074949 63074

20 Email: e.mayhew@imperial.ac.uk  
21  
22

23  
24  
25  
26  
27  
28  
29 Authors:

30 John F.S. Millwood Hargrave,

31 South Thames Foundation School

32 Royal Army Medical Corps

33 208 Field Hospital, London, UK  
34  
35

36  
37  
38  
39  
40  
41 A.Phillip Pearce,

42 Centre for Blast Injury Studies

43 Imperial College London

44 Queensgate

45 London SW7 2AZ  
46  
47

48  
49  
50  
51  
52  
53 Emily R. Mayhew,

54 Dept of Bioengineering

55 Imperial College London  
56  
57  
58  
59  
60

1  
2  
3 Anthony M.J. Bull,  
4  
5 Dept of Bioengineering  
6  
7 Imperial College London  
8  
9 Queensgate  
10  
11 London SW7 2AZ  
12  
13

14  
15 Sebastian Taylor  
16  
17 Royal College of Paediatrics and Child Health  
18  
19 5-11 St Theobald's Road  
20  
21 London WC1X 8SH  
22  
23

24  
25  
26 Keywords: Paediatric, blast, trauma, conflict, outcomes  
27  
28

29  
30 Wordcount: 5,336.  
31  
32

33  
34  
35  
36  
37  
38  
39 **Patient and public involvement statement:**

40  
41 **No patients or members of the public were involved in this review.**  
42  
43

44  
45 **Contributorship Statement**

46  
47 Professor Anthony Bull and Dr Emily Mayhew conceived the original analysis. Dr John  
48 Hargrave undertook the literature review, with guidance on structure and inclusion of  
49 sources by Dr Phil Pearce. Dr Anthony Bull advised on the bioengineering sections of the  
50 review. Dr Pearce and Dr Taylor advised on the medical sections of the review. Dr Emily  
51 Mayhew wrote the conclusion of the review. Dr Hargrave wrote the main body of the  
52 review and selected the material for the tables and figures. Dr Hargrave designed and  
53 completed the tables and figures. Dr Hargrave assembled the bibliography. All authors  
54 contributed to the critical interpretation of the results, and approved the final draft of the  
55 review.  
56  
57  
58  
59  
60

## Key questions

### What is already known on this topic?

- Approximately one in six children live in conflict zones, where exposure to blast injuries is not uncommon. Blast injuries have the potential to inflict significant mortality and morbidity upon the global paediatric population living in conflict zones.
- Describing the characteristics of injuries sustained by the paediatric population is essential in advancing local and global health policies. Despite this, common themes related to paediatric injury following to blasts are poorly described.

### What this study adds?

- Paediatric victims are most likely to be male, with victims following conflict and explosive remnants of war (ERW) typically 4-10 years old. Of these victims, agricultural occupation and poor educational status is related to level of exposure.
- Head injuries are the leading cause of death in 46-71% of paediatric victims, and strongly associated with facial and ocular injuries conferring significant social and economic implications to the victims.
- Injuries to the extremities are seen in approximately half of children exposed to blast trauma, with upper limb injuries requiring between 1.5 to 3 times more operative intervention compared to adults. Functional repercussions of these injuries are significant, with 15% of traumatic amputations in the lower limb frequently requiring operative and prosthetic re-revision.
- An influx of paediatric patients can rapidly overwhelm health facilities, with between 47-82% of children requiring surgical intervention, of which 25% required over 4 procedures. Greater requirement for intensive care support in addition to prolonged inpatient and rehabilitative stays contributes to considerable service strain.

## Abstract

**Background and significance.** Blast injuries arising from high explosive weaponry is common in conflict areas. While blast injury characteristics are well recognised in the adults, there is a lack of consensus as to whether these characteristics translate to the paediatric population. Understanding blast injury patterns in this cohort is essential for providing appropriate provision of services and care for this vulnerable cohort.

**Methods.** In this mixed-method review, original papers were screened for data pertaining to paediatric injuries following blasts. Information on demographics, morbidity and mortality and service requirements were evaluated. The papers were written and published in English from

1  
2  
3 a range of international specialists in the field. Patient and public involvement statement: No  
4 patients or members of the public were involved in this review.  
5  
6

7 **Results.** Children affected by blast injuries are predominantly male and their injuries arise  
8 from explosive remnants of war, particularly unexploded ordinance. Blasts show increased  
9 morbidity and mortality in younger children, while older children have injury patterns similar to  
10 adults. Head and burn injuries represent a significant cause of mortality in young children,  
11 while lower limb morbidity is reduced compared to adults. Children have a disproportionate  
12 requirement for both operative and non-operative service resources, and provisions for this  
13 burden are essential.  
14  
15  
16  
17  
18

19 **Conclusions.** Certain characteristics of paediatric injuries arising from blasts are distinct from  
20 that of the adult cohort, while the intensive demands on services highlights the importance of  
21 understanding the diverse injury patterns in order to optimise future service provisions in  
22 caring for this the child blast survivor..  
23  
24  
25  
26  
27  
28  
29  
30  
31  
32  
33  
34  
35  
36  
37  
38  
39  
40  
41  
42  
43  
44  
45  
46  
47  
48  
49  
50  
51  
52  
53  
54  
55  
56  
57  
58  
59  
60

## Introduction

Approximately one in six children live in conflict zones, with the main global burden borne by citizens of low and middle income countries (LMICs)(1). Children enmeshed in conflict and post-conflict zones are frequently exposed to high-order explosives (HE), either through explosive remnants of war (ERW) such as landmines and unexploded ordinance (UXOs), military ordinance such as shelling and aerial bombardments or acts perpetrated by non-state actors such as improvised explosive devices (IEDs) and suicide bombing(2). HE can inflict unique and unusual injuries upon the child through the blast over-pressure wave (primary blast injury), energisation of materials causing fragmentation (secondary blast injury), bodily displacement or crush injuries (tertiary blast injuries) and through burns, inhalation, toxic or psychological trauma (quaternary blast injuries)(3).

Article 3.3 of the UN Convention on the Rights of the Child (UNCRC) states that medical care of the child be delivered and supervised by providers competent in that field(4). However, paediatric care in conflict zones is often delivered by personnel for whom experience of dealing with paediatric blast injuries is unusual(5). Primary studies increasingly recognise the complex patterns of injury sustained in the adult population following blast exposure(3), however there is a lack of consensus as to whether applying lessons learnt from the adult population translates appropriately into paediatric cohorts(6). Bree et al(7) argue that principles for life-saving interventions, such as prioritising catastrophic haemorrhage, airway, breathing and circulation are just as applicable in children as adults. Conversely Fendya et al(8) contend that directly applying adult trauma principles to the paediatric population neglects the social, anatomical, physiological and psychological differences between adults and children, affecting the validity of these inferences.

While primary studies have described injuries sustained by the blast injured child, no study has attempted to synthesise the data to identify recurrent characteristics in this vulnerable cohort. Understanding the characteristics of such injuries to the paediatric population will advance efforts to prevent, mitigate, and treat these injuries in domestic and deployed health systems(3). The aim of this review is to provide an overview of injury patterns and challenges in caring for the blast-injured child, in order to define future research needs for protection, mitigation, immediate medical treatment, and rehabilitation.

## Methods

In this mixed-methods review, original peer-reviewed quantitative, qualitative and mixed-method observational studies, in addition to grey literature, were screened for data on



1  
2  
3 explosive injuries in paediatric cohorts. By utilising all study designs, greater capture of  
4 relevant literature was achieved, although this meant the data was unsuitable for a formal  
5 systematic review. PubMed and Scopus (including Embase) were searched. Search terms  
6 including “Paediatric” OR “Pediatric” OR “Child\*” OR “Children” AND “Blast” OR “Explosi\*” OR  
7 “Explosion” were used to capture potential studies. Articles had to be written in English and  
8 published before December 16, 2018. Studies involving adult as well as children were  
9 included, in addition to articles where the mechanism of injury was mixed. This decision was  
10 taken in order to accurately reflect the settings the studies represent, where victims in conflict  
11 zones are heterogenous and subject to a variety of combat related mechanisms. Studies were  
12 omitted if they did not specify explosive mechanisms or include children.  
13  
14  
15  
16  
17  
18  
19

20 Children are defined as all humans under the age of eighteen years (as specified by the United  
21 Nations Convention on the Rights of the Child)(4). The heterogeneity and arbitrary nature of  
22 what defines a child is acknowledged, and studies often utilise individual definitions. Within  
23 this review ages are defined thus: <1 year are infants, 1-8 are young children; 9-13 are older  
24 children and 14-18 are adolescents.  
25  
26  
27  
28

29 **Patient and public involvement statement:**

30  
31 No patients or members of the public were involved in this review.  
32  
33  
34  
35  
36  
37  
38  
39  
40  
41  
42  
43  
44  
45  
46  
47  
48  
49  
50  
51  
52  
53  
54  
55  
56  
57  
58  
59  
60

## Results

Figure 1: Study selection

Study selection of the 74 studies included in this review are shown in figure 1. Of these, 26 utilise trauma registries (table 1), 26 single centre hospital based case series (table 2), 8 use multi-centre hospital based case series (table 3), 13 use community surveillance (table 4) while 1 uses grey literature (table 5).

Table 1. The 26 studies utilising trauma registries

|                                   | Monitoring period | Location            | Setting  | Sample Size | Population                      | Exposure                                                                    | Study                                   | Effect investigated    |
|-----------------------------------|-------------------|---------------------|----------|-------------|---------------------------------|-----------------------------------------------------------------------------|-----------------------------------------|------------------------|
| Aharonson-Daniel et al (2003)(9)  | 2000-2001         | Israel              | Civilian | 138         | Paediatric (100%)               | IEDs/Suicide IEDs (67%)<br>GSW (25%)<br>Other (8%)                          | Retrospective. National Trauma Registry | Injuries and mortality |
| Aharonson-Daniel et al (2006)(10) | 2000-2004         | Israel              | Civilian | 1155        | Paediatric (8%)<br>Adult (92%)  | Suicide IEDs (100%)                                                         | Retrospective. National Trauma Registry | Injuries and mortality |
| Amir et al (2005)(11)             | 2000-2002         | Israel              | Civilian | 148         | Paediatric (100%)               | IEDs/Shelling (66%)<br>GSW (34%)                                            | Retrospective. National Trauma Registry | Injuries and mortality |
| Bilukha et al (2015)(12)          | 2010-2013         | Iraq                | Civilian | 2803        | Paediatric (13%)<br>Adult (87%) | IEDs (49%)<br>Other/Unknown (51%)                                           | Retrospective. Military Trauma Registry | Injuries and mortality |
| Bitterman et al (2016)(13)        | 2013              | Israel              | Military | 84          | Paediatric (100%)               | IEDs/Shelling (67%)<br>GSW (23%)<br>Non-Combat (10%)                        | Retrospective. Military Trauma Registry | Injuries and mortality |
| Borgman et al (2012)(14)          | 2001-2011         | Afghanistan<br>Iraq | Military | 128582      | Paediatric (6%)<br>Adult (94%)  | Non-Combat (40%)<br>IEDs/Shelling (38%)<br>GSW (22%)                        | Retrospective. Military Trauma Registry | Injuries and mortality |
| Borgman et al (2015)(15)          | 2003-2011         | Afghanistan<br>Iraq | Military | 549         | Paediatric (100%)               | Non-Combat (84%)<br>IEDs/Shelling (11%)<br>Other/Unknown (5%)               | Retrospective. Military Trauma Registry | Injuries and mortality |
| Creamer et al (2009)(16)          | 2004-2007         | Afghanistan<br>Iraq | Military | 2090        | Paediatric (100%)               | GSW (29%)<br>IEDs/Shelling (24%)<br>Other/Unknown (22%)<br>Non-combat (25%) | Retrospective. Military Trauma Registry | Injuries and mortality |
| Dua et al (2013)(17)              | 2006-2008         | Iraq                | Military | 25          | Paediatric (100%)               | IEDs/Shelling (72%)<br>GSW (28%)                                            | Retrospective. Military Trauma Registry | Injuries and mortality |
| Edwards et al (2012)(18)          | 2002-2012         | Afghanistan<br>Iraq | Military | 4913        | Paediatric (100%)               | IEDs/Shelling (100%)                                                        | Retrospective. Military Trauma Registry | Injuries and mortality |
| Edwards et al (2014)(19)          | 2002-2012         | Afghanistan<br>Iraq | Military | 6273        | Paediatric (100%)               | IEDs/Shelling (23%)<br>GSW (16%)<br>Other/Unknown (4%)<br>Non-Combat (57%)  | Retrospective. Military Trauma Registry | Injuries and mortality |

|                             |           |                     |          |      |                                 |                                                                                   |                                            |                        |
|-----------------------------|-----------|---------------------|----------|------|---------------------------------|-----------------------------------------------------------------------------------|--------------------------------------------|------------------------|
| Edwards et al (2014)(20)    | 2002-2010 | Afghanistan<br>Iraq | Military | 4928 | Paediatric (100%)               | IEDs/Shelling (100%)                                                              | Retrospective.<br>Military Trauma Registry | Injuries and mortality |
| Hillman et al (2016)(21)    | 2003-2014 | Afghanistan<br>Iraq | Military | 27   | Paediatric (100%)               | IEDs /Shelling (59%)<br>GSW (26%)<br>Non-combat (15%)                             | Retrospective.<br>Military Trauma Registry | Injuries and mortality |
| Jaffe et al (2010)(22)      | 2000-2005 | Israel              | Civilian | 837  | Paediatric (14%)<br>Adult (86%) | IEDs (100%)                                                                       | Retrospective.<br>National Trauma Registry | Injuries and mortality |
| Khan et al (2015)(23)       | 2010-2011 | Pakistan            | Civilian | 103  | Paediatric (16%)<br>Adult (84%) | IEDs (100%)                                                                       | Retrospective National Trauma Registry     | Injuries and mortality |
| Kluger et al (2004)(24)     | 2000-2003 | Israel              | Civilian | 906  | Paediatric (7%)<br>Adult (93%)  | IEDs (100%)                                                                       | Retrospective.<br>National Trauma Registry | Injuries and mortality |
| McKechnie et al (2014)(25)  | 2008-2012 | Afghanistan         | Military | 766  | Paediatric (100%)               | IEDs/Shelling (51%)<br>GSW (28%)<br>Non-combat (21%)                              | Retrospective.<br>Military Trauma Registry | Injuries and mortality |
| Naylor et al (2018)(26)     | 2007-2016 | Afghanistan<br>Iraq | Military | 3439 | Paediatric (100%)               | IEDs/Shelling (38%)<br>GSW (20%)<br>Non-combat (11%)<br>Other/Not specified (31%) | Retrospective.<br>Military Trauma Registry | Injuries and mortality |
| Neff et al (2014)(27)       | 2001-2013 | Afghanistan<br>Iraq | Military | 1113 | Paediatric (100%)               | IEDs/Shelling (56%)<br>GSW (32%)<br>Non-combat (12%)                              | Retrospective.<br>Military Trauma Registry | Injuries and mortality |
| Patregnani et al (2012)(28) | 2002-2009 | Afghanistan<br>Iraq | Military | 744  | Paediatric (100%)               | IEDs/Shelling (43%)<br>GSW (26%)<br>Non-combat (31%)                              | Retrospective.<br>Military Trauma Registry | Injuries and mortality |
| Quintana et al (1997)(29)   | 1996      | USA                 | Civilian | 66   | Paediatric (100%)               | IED (100%)                                                                        | Retrospective.<br>National Trauma Registry | Injuries and mortality |
| Schauer et al (2018)(30)    | 2007-2016 | Afghanistan<br>Iraq | Military | 3388 | Paediatric (100%)               | IEDs/Shelling (43%)<br>GSW (22%)<br>Non-combat (35%)                              | Retrospective.<br>Military Trauma Registry | Injuries and mortality |
| Smith et al (2014)(31)      | 2003-2011 | Afghanistan<br>Iraq | Military | 813  | Paediatric (6%)<br>Adult (94%)  | IEDs/Shelling (77%)<br>GSW (23%)                                                  | Retrospective.<br>Military Trauma Registry | Injuries and mortality |
| Villamaria et al (2014)(32) | 2002-2011 | Afghanistan<br>Iraq | Military | 155  | Paediatric (100%)               | IEDs/Shelling (58%)<br>GSW (37%)<br>Other/Not specified (5%)                      | Retrospective.<br>Military Trauma Registry | Injuries and mortality |
| Waisman et al (2003)(33)    | 2000-2002 | Israel              | Civilian | 160  | Paediatric (100%)               | IEDs (67%)<br>GSW (25%)<br>Other/Not specified (11%)                              | Retrospective.<br>National Trauma Registry | Injuries and mortality |
| Woods et al (2012)(34)      | 2003-2009 | Afghanistan<br>Iraq | Military | 176  | Paediatric (100%)               | IEDs/Shelling (59%)<br>GSW (21%)<br>Non-combat (20%)                              | Retrospective.<br>Military Trauma Registry | Injuries and mortality |

Table 2. The 26 studies utilising single centre hospital based case series

| Monitoring period | Location | Setting | Sample Size | Population | Exposure | Study | Effect investigated |
|-------------------|----------|---------|-------------|------------|----------|-------|---------------------|
|-------------------|----------|---------|-------------|------------|----------|-------|---------------------|

|    |                              |           |             |          |      |                                 |                                                                                  |                                                         |                        |
|----|------------------------------|-----------|-------------|----------|------|---------------------------------|----------------------------------------------------------------------------------|---------------------------------------------------------|------------------------|
| 1  | Al-Worikat et al (2001)(35)  | 1988-2000 | Jordan      | Civilian | 226  | Paediatric (10%)<br>Adult (90%) | Landmines (100%)                                                                 | Retrospective. Single centre Hospital based case series | Long term sequelae     |
| 2  |                              |           |             |          |      |                                 |                                                                                  |                                                         |                        |
| 3  | Arul et al (2012)(36)        | 2011      | Afghanistan | Military | 82   | Paediatric (100%)               | IEDs/Shelling (52%)<br>GSW (11%)<br>Non-combat (37%)                             | Retrospective. Single centre Hospital based case series | Injuries and mortality |
| 4  |                              |           |             |          |      |                                 |                                                                                  |                                                         |                        |
| 5  | Bajec et al (1993)(37)       | 1991      | Kuwait      | Civilian | 152  | Paediatric (12%)<br>Adult (88%) | Landmines (100%)                                                                 | Retrospective. Single centre Hospital based case series | Injuries and mortality |
| 6  |                              |           |             |          |      |                                 |                                                                                  |                                                         |                        |
| 7  | Beitler et al (2006)(38)     | 2002      | Afghanistan | Military | 204  | Paediatric (28%)<br>Adult (72%) | Non-combat (44%)<br>IEDs/Shelling (36%)<br>GSW (20%)                             | Retrospective. Single centre Hospital based case series | Injuries and mortality |
| 8  |                              |           |             |          |      |                                 |                                                                                  |                                                         |                        |
| 9  | Bertani et al (2015)(39)     | 2009-2013 | Afghanistan | Military | 89   | Paediatric (100%)               | IEDs/Shelling (79%)<br>GSW (21%)                                                 | Retrospective. Single centre Hospital based case series | Injuries and mortality |
| 10 |                              |           |             |          |      |                                 |                                                                                  |                                                         |                        |
| 11 | Coppola et al (2006)(40)     | 2004-2005 | Iraq        | Military | 85   | Paediatric (100%)               | IEDs/Shelling (29%)<br>Non-combat (44%)<br>Other/Unknown (27%)                   | Retrospective. Single centre Hospital based case series | Injuries and Mortality |
| 12 |                              |           |             |          |      |                                 |                                                                                  |                                                         |                        |
| 13 | Can et al (2009)(41)         | 2001-2008 | Turkey      | Civilian | 23   | Paediatric (100%)               | Landmines (87%)<br>UXO (13%)                                                     | Retrospective. Single centre Hospital based case series | Injuries and mortality |
| 14 |                              |           |             |          |      |                                 |                                                                                  |                                                         |                        |
| 15 | Chehab et al (2018)(42)      | 2009-2012 | Afghanistan | Military | 81   | Paediatric (100%)               | IEDs/Shelling (67%)<br>GSW (21%)<br>Stabbing (12%)                               | Retrospective. Single-centre Hospital based case series | Injuries and mortality |
| 16 |                              |           |             |          |      |                                 |                                                                                  |                                                         |                        |
| 17 | Er et al (2017)(43)          | 2013-2014 | Syria       | Civilian | 1591 | Paediatric (18%)<br>Adult (82%) | IEDs/Shelling (77%)<br>GSW (7%)<br>Other/Unknown (16%)                           | Retrospective. Single-centre Hospital based case series | Injuries and Mortality |
| 18 |                              |           |             |          |      |                                 |                                                                                  |                                                         |                        |
| 19 | Fares et al (2013)(44)       | 2006-2011 | Lebanon     | Civilian | 122  | Paediatric (100%)               | UXO (100%)                                                                       | Retrospective. Single centre Hospital based case series | Long term sequelae     |
| 20 |                              |           |             |          |      |                                 |                                                                                  |                                                         |                        |
| 21 | Fares et al (2014)(45)       | 2006-2013 | Lebanon     | Civilian | 29   | Paediatric (28%)<br>Adult (72%) | UXO (100%)                                                                       | Retrospective. Single centre Hospital based case series | Injuries and mortality |
| 22 |                              |           |             |          |      |                                 |                                                                                  |                                                         |                        |
| 23 | Gurney et al (2004)(46)      | 2003      | Iraq        | Military | 78   | Paediatric (100%)               | IEDs/Shelling (7%)<br>GSW (1%)<br>Other/Not specified (9%)<br>Non-Conflict (83%) | Retrospective. Single-centre Hospital based case series | Injuries and mortality |
| 24 |                              |           |             |          |      |                                 |                                                                                  |                                                         |                        |
| 25 | Harris et al (2009)(5)       | 2008      | Afghanistan | Military | 15   | Paediatric (100%)               | IEDs/Shelling (87%)<br>Other/Not specified (6%)<br>Non-conflict (7%)             | Retrospective. Single-centre Hospital based case series | Injuries and mortality |
| 26 |                              |           |             |          |      |                                 |                                                                                  |                                                         |                        |
| 27 | Hinsley et al (2005)(47)     | 2003      | Iraq        | Military | 79   | Paediatric (10%)<br>Adult (90%) | IEDs/Shelling (63%)<br>GSW (37%)                                                 | Retrospective Single-centre Hospital based case series  | Injuries and mortality |
| 28 |                              |           |             |          |      |                                 |                                                                                  |                                                         |                        |
| 29 | Hodalic et al (1999)(48)     | 1991-1992 | Croatia     | Military | 1211 | Paediatric (13%)<br>Adult (87%) | IEDs/Shelling (95%)<br>GSW (3%)<br>Other/Not specified (2%)                      | Retrospective. Single-centre Hospital based case series | Injuries and mortality |
| 30 |                              |           |             |          |      |                                 |                                                                                  |                                                         |                        |
| 31 | Inwald et al (2014)(49)      | 2011-2012 | Afghanistan | Military | 112  | Paediatric (100%)               | IEDs/Shelling (54%)<br>GSW (29%)<br>Non-conflict (17%)                           | Retrospective Single-centre Hospital based case series  | Injuries and mortality |
| 32 |                              |           |             |          |      |                                 |                                                                                  |                                                         |                        |
| 33 | Jeevaratnam et al (2013)(50) | 2010      | Afghanistan | Military | 88   | Paediatric (35%)<br>Adult (65%) | IEDs/Shelling (33%)<br>Non-conflict (67%)                                        | Retrospective Single-centre Hospital based case series  | Injuries and mortality |
| 34 |                              |           |             |          |      |                                 |                                                                                  |                                                         |                        |
| 35 | Klumo et al (2010)(51)       | 2007-2009 | Afghanistan | Military | 43   | Paediatric (100%)               | IEDs/Shelling (67%)                                                              | Retrospective. Single-centre Hospital based case series | Injuries and mortality |
| 36 |                              |           |             |          |      |                                 |                                                                                  |                                                         |                        |
| 37 |                              |           |             |          |      |                                 |                                                                                  |                                                         |                        |
| 38 |                              |           |             |          |      |                                 |                                                                                  |                                                         |                        |
| 39 |                              |           |             |          |      |                                 |                                                                                  |                                                         |                        |
| 40 |                              |           |             |          |      |                                 |                                                                                  |                                                         |                        |
| 41 |                              |           |             |          |      |                                 |                                                                                  |                                                         |                        |
| 42 |                              |           |             |          |      |                                 |                                                                                  |                                                         |                        |
| 43 |                              |           |             |          |      |                                 |                                                                                  |                                                         |                        |
| 44 |                              |           |             |          |      |                                 |                                                                                  |                                                         |                        |
| 45 |                              |           |             |          |      |                                 |                                                                                  |                                                         |                        |
| 46 |                              |           |             |          |      |                                 |                                                                                  |                                                         |                        |
| 47 |                              |           |             |          |      |                                 |                                                                                  |                                                         |                        |
| 48 |                              |           |             |          |      |                                 |                                                                                  |                                                         |                        |
| 49 |                              |           |             |          |      |                                 |                                                                                  |                                                         |                        |
| 50 |                              |           |             |          |      |                                 |                                                                                  |                                                         |                        |
| 51 |                              |           |             |          |      |                                 |                                                                                  |                                                         |                        |
| 52 |                              |           |             |          |      |                                 |                                                                                  |                                                         |                        |
| 53 |                              |           |             |          |      |                                 |                                                                                  |                                                         |                        |
| 54 |                              |           |             |          |      |                                 |                                                                                  |                                                         |                        |
| 55 |                              |           |             |          |      |                                 |                                                                                  |                                                         |                        |
| 56 |                              |           |             |          |      |                                 |                                                                                  |                                                         |                        |
| 57 |                              |           |             |          |      |                                 |                                                                                  |                                                         |                        |
| 58 |                              |           |             |          |      |                                 |                                                                                  |                                                         |                        |
| 59 |                              |           |             |          |      |                                 |                                                                                  |                                                         |                        |
| 60 |                              |           |             |          |      |                                 |                                                                                  |                                                         |                        |

|                           |           |                |          |      |                                |                                                               |                                                         |                        |
|---------------------------|-----------|----------------|----------|------|--------------------------------|---------------------------------------------------------------|---------------------------------------------------------|------------------------|
|                           |           |                |          |      |                                | GSW (5%)<br>Non-combat (28%)                                  |                                                         |                        |
| Matos et al (2008)(52)    | 2003-2004 | Iraq           | Military | 1132 | Paediatric (3%)<br>Adult (97%) | IEDs/Shelling (64%)<br>Non-combat (36%)                       | Retrospective. Single-centre Hospital based case series | Injuries and mortality |
| McGuigan et al (2007)(53) | 2004      | Iraq           | Military | 99   | Paediatric (100%)              | GSW (42%)<br>IEDs/Shelling (35%)<br>Other/Not specified (23%) | Retrospective. Single-centre Hospital based case series | Injuries and mortality |
| Nordmann et al (2010)(54) | 2008-2009 | Afghanistan    | Military | 31   | Paediatric (100%)              | IEDs/Shelling (45%)<br>GSW (32%)<br>Non-combat (23%)          | Retrospective. Single-centre Hospital based case series | Injuries and mortality |
| Pannell et al (2015)(55)  | 2010-2011 | Afghanistan    | Military | 263  | Paediatric (100%)              | IEDs/Shelling (42%)<br>GSW (17%)<br>Non-combat (41%)          | Retrospective. Single-centre Hospital based case series | Injuries and mortality |
| Pearce et al (2015)(56)   | 2011-2012 | Afghanistan    | Military | 281  | Paediatric (100%)              | IEDs/Shelling (47%)<br>GSW (13%)<br>Non-combat (35%)          | Retrospective. Single-centre Hospital based case series | Injuries and mortality |
| Terzic et al (2001)(57)   | 1991-1995 | Bosnia Croatia | Civilian | 92   | Paediatric (100%)              | IEDs/Shelling/UXO (100%)                                      | Retrospective. Single-centre Hospital based case series | Injuries and mortality |
| Thompson et al (2017)(58) | 2006-2013 | Afghanistan    | Military | 295  | Paediatric (100%)              | IED (68%)<br>UXO (4%)<br>Other/Not specified (28%)            | Retrospective. Single-centre Hospital based case series | Injuries and mortality |
| Walker et al (2010)(59)   | 2006-2007 | Afghanistan    | Military | 78   | Paediatric (100%)              | IEDs/Shelling (64%)<br>GSW (37%)<br>Other/Not specified (5%)  | Retrospective. Single-centre Hospital based case series | Injuries and mortality |
| Wilson et al (2013)(60)   | 2010-2011 | Afghanistan    | Military | 41   | Paediatric (100%)              | IEDs/Shelling (47%)<br>GSW (12%)<br>Non-combat (42%)          | Retrospective. Single-centre Hospital based case series | Injuries and mortality |

Table 3. The 8 studies utilising multi-centre hospital based case series

|                             | Monitoring period | Location | Setting  | Sample Size | Population                      | Exposure                                                | Study                                                           | Effect investigated    |
|-----------------------------|-------------------|----------|----------|-------------|---------------------------------|---------------------------------------------------------|-----------------------------------------------------------------|------------------------|
| Arafat et al (2017)(61)     | 2012-2013         | Syria    | Civilian | 324         | Paediatric (18%)<br>Adult (82%) | IEDs/Shelling (57%)<br>GSW (43%)                        | Retrospective. Multi-centre Hospital based case series          | Injuries and mortality |
| Bendinelli et al (2009)(62) | 2003-2006         | Cambodia | Civilian | 356         | Paediatric (26%)<br>Adult (74%) | Landmines (67%)<br>UXO (33%)                            | Retrospective. Multi-centre Hospital based case series          | Injuries and mortality |
| Celikel et al (2014)(63)    | 2012              | Syria    | Civilian | 186         | Paediatric (22%)<br>Adult (78%) | IEDs/Shelling (67%)<br>GSW (26%)<br>Other/Unknown (7%)  | Retrospective. Multi-centre Hospital based mortuary case series | Mortality              |
| Celikel et al (2015)(64)    | 2012-2014         | Syria    | Civilian | 140         | Paediatric (100%)               | IEDs/Shelling (70%)<br>GSW (14%)<br>Other/Unknown (16%) | Retrospective. Multi-centre Hospital based mortuary case series | Mortality              |
| Gataa et al (2011)(65)      | 2005-2006         | Iraq     | Civilian | 551         | Paediatric (20%)<br>Adult (80%) | IEDs (82%)<br>GSW (18%)                                 | Retrospective. Multi-centre Hospital based case series          | Injuries and mortality |

|                          |           |                     |          |      |                                 |                             |                                                                |                        |
|--------------------------|-----------|---------------------|----------|------|---------------------------------|-----------------------------|----------------------------------------------------------------|------------------------|
| Hanevik et al (2000)(66) | 1991-1995 | Eritrea             | Civilian | 248  | Paediatric (63%)<br>Adult (37%) | Landmines (100%)            | Retrospective. Multi-centre Hospital based case series         | Injuries and mortality |
| Mirza et al (2013)(67)   | 2007-2011 | Pakistan            | Civilian | 1142 | Paediatric (6%)<br>Adult (94%)  | IEDs (100%)                 | Retrospective Multi-centre Hospital based mortuary case series | Injuries and mortality |
| Spinella et al 2008(68)  | 2001-2007 | Afghanistan<br>Iraq | Military | 1305 | Paediatric (100%)               | Trauma (Unspecified) (100%) | Retrospective. Multi-centre Hospital based case series         | Injuries and mortality |

Table 4. The 13 studies utilising community surveillance

|                                    | Monitoring period | Location                                        | Setting  | Sample Size | Population                      | Exposure                                                    | Study                                              | Effect investigated                           |
|------------------------------------|-------------------|-------------------------------------------------|----------|-------------|---------------------------------|-------------------------------------------------------------|----------------------------------------------------|-----------------------------------------------|
| Andersson et al (1995)(69)         | 1994-1995         | Afghanistan<br>Bosnia<br>Cambodia<br>Mozambique | Civilian | 2100        | Paediatric (100%)               | Landmines (100%)                                            | Retrospective. community surveillance              | Socio-economic                                |
| Bilukha et al (2003)(70)           | 2001-2002         | Afghanistan                                     | Civilian | 1636        | Paediatric (46%)<br>Adult (54%) | UXO (47%) Landmine (41%)<br>Other/Unknown (12%)             | Retrospective. Community Surveillance              | Injuries and mortality                        |
| Bilukha et al (2007)(71)           | 1994-2005         | Chechnya                                        | Civilian | 3021        | Paediatric (30%)<br>Adult (70%) | Landmines (41%)<br>UXO (37%)<br>Other/Unknown (22%)         | Retrospective. Community Surveillance              | Injuries and mortality                        |
| Bilukha et al (2008)(72)           | 2002-2006         | Afghanistan                                     | Civilian | 5471        | Paediatric (54%)<br>Adult (46%) | UXO (50%)<br>Landmines (42%)<br>Other/Unknown (8%)          | Retrospective. Community Surveillance              | Injuries and mortality                        |
| Bilukha et al (2011)(73)           | 2006-2010         | Nepal                                           | Civilian | 307         | Paediatric (58%)<br>Adult (42%) | IEDs (76%)<br>Landmines (4%)<br>Other/Unknown (20%)         | Retrospective. Community Surveillance              | Injuries and mortality                        |
| Bilukha et al (2013)(74)           | 2008-2011         | Nepal                                           | Civilian | 437         | Paediatric (14%)<br>Adult (76%) | IEDs (69%)<br>Other/Unknown (31%)                           | Retrospective. Community Surveillance              | Injuries and mortality                        |
| Guerrero et al (2014)(75)          | 2013              | USA                                             | Civilian | 11          | Paediatric (100%)               | IEDs (100%)                                                 | Prospective. Community Surveillance                | Long term sequelae                            |
| Guha-Sapir et al (2018)(76)        | 2011-2016         | Syria                                           | Civilian | 101453      | Paediatric (17%)<br>Adult (83%) | Shelling/Air bombardment (57%)<br>Other/Not specified (43%) | Retrospective. Community Surveillance              | Mortality                                     |
| Hemmati et al (2015)(77)           | 1988-2013         | Iran                                            | Civilian | 78          | Paediatric (100%)               | Landmines (100%)                                            | Cross-section. Community surveillance              | Long term sequelae                            |
| Kinra et al (2003)(78)             | 1991-2000         | Bosnia and Herzegovina                          | Civilian | 4064        | Paediatric (14%)<br>Adult (86%) | Landmines (100%)                                            | Retrospective. Community Surveillance              | Injuries and mortality                        |
| Mousavi et al (2015)(79)           | 2014              | Iran                                            | Civilian | 78          | Paediatric (100%)               | Landmines (80%)<br>UXO (20%)                                | Retrospective. Mixed-method community surveillance | Long-term sequelae/<br>Injuries and mortality |
| Pat-Horenczyk et al (2007)(80)     | 2006              | Israel                                          | Civilian | 695         | Paediatric (100%)               | IEDs (100%)                                                 | Retrospective. Mixed-method community surveillance | Long term sequelae                            |
| Poor Zamany Nejat et al (2016)(81) | 2015              | Iran                                            | Civilian | 41          | Paediatric (100%)               | Landmines (100%)                                            | Retrospective mixed-method community surveillance  | Long term sequelae                            |

Table 5. The 1 study utilising grey literature

|                             | Monitoring period | Location | Setting  | Sample Size | Population                      | Exposure                         | Study           | Effect investigated |
|-----------------------------|-------------------|----------|----------|-------------|---------------------------------|----------------------------------|-----------------|---------------------|
| Guha-Sapir et al (2015)(82) | 2011-2014         | Syria    | Civilian | 78769       | Paediatric (16%)<br>Adult (84%) | IEDs/Shelling (75%)<br>GSW (25%) | Grey-literature | Mortality           |

## Demographics

Following the use of explosive weaponry by non-state actors against civilians, the most commonly injured paediatric cohort are males aged 10-18 years old(9,11,33), while children involved in conflict and ERW blast injuries were generally aged between 4-10 years old(18,59). Perpetrators target busy areas such as restaurants and nightclubs which older children and adolescents might frequent (10,11,33), while cultural factors within LMICs in these social areas result in a predominantly male cohort (9,10,12,22–24,33,67,75,80). Similar gender finding are observed in children following conflict and ERW related injuries where all studies showed male predominance in victims, with over 70% male in three quarters of the studies (Figure 2).

Figure 2. Gender differences in in casualties following blast

ERW contribute considerable morbidity and mortality both during and following conflict. As seen in figure 3, children were more likely to be injured by UXO compared with adults, while landmines affected a predominately adult cohort (35,37,41,62,69,70,72,73,78). It should be noted that statistics on pre-hospital mortality for children in conflict settings is generally an underestimation due to the difficulties in reporting and monitoring. Many explosive weapons observation groups do not or are unable to distinguish between adults and children in their reporting.

Figure 3. Percentage of Casualties (injuries and fatalities) by specific modalities

UXOs have been described as small, colourful and toy-like, promoting child interaction and subsequent injury from handling, resulting in often fatal upper limb, head, neck or chest injury(41,44,62,83,84). Due to the social nature of children, these interactions commonly occur in groups, leading to multiple casualties in 45-63% of events involving children compared to 30-40% in adults(70,78,79).

Occupation and education play a role in ERW injuries. It is common for children in LMICs, particularly males, to assist their family with herding and farming as opposed to attending school. This may affect the likelihood to exposure to ERWs through increased freedom to roam where such devices are present(25,42,64,72). A lack of formal education impacts the child's ability to read warning signs; only 6-22% of victims were aware ERWs were present(27,80) and of these, only 0-11% had received ERW risk education(23,25,27,80).

1  
2  
3 Children are particularly vulnerable to wide-area explosives such as aerial bombardment and  
4 shelling, particularly in the primarily urbanised environments of modern conflicts. In the Syrian  
5 Civil War, three quarters of wide-area explosives were used in civilian residential areas that  
6 children frequent, with these mechanisms responsible for 82% of child deaths(76,82).  
7  
8  
9

10 The following section reviews what is known of mortality in children before reviewing injury  
11 types.  
12  
13

## 14 **Mortality**

15  
16  
17  
18 Comparison of paediatric wartime mortality data is difficult as many studies do not differentiate  
19 mechanism of injury. Edwards et al(85) study on 4,913 children between 2002-2010  
20 presenting with blast injuries remains the single largest data set. The reported mortality rate  
21 of 8% matches well with the mortality rates of 6-9% quoted in paediatric trauma deaths from  
22 Iraq and Afghanistan, although these studies displayed all trauma mechanisms as opposed to  
23 specifying blast trauma(14,16,20,25,36,40). Between 2006-2013, Thompson et al. (58) noted  
24 a mortality rate over double of that quoted by Edwards et al. following paediatric blast injury  
25 in Afghanistan (18%). Operational tempo and the increasing use of IEDs have been  
26 hypothesized to underlie these discrepancies in mortality(58).  
27  
28  
29  
30  
31  
32

33 Age related variation in mortality has been described. Matos et al noted mortality was highest  
34 at 24% in young children (5-8 year old)(52) while Schauer et al and Spinella et al found  
35 greatest mortality in 0-4 years(30,68). Similarly, Borgman et al and Matos et al noted that  
36 children <8 years old had increased trauma mortality compared to 8-16 year olds (10-18% vs  
37 4-7%)(15,52), while Spinella et al noted a similar increase in mortality in young children (<6  
38 year old) compared to 6-16 year olds (11% vs 4%)(68). Few studies directly compare adult  
39 and paediatric mortality, and comparisons between studies are difficult due to methodological  
40 differences. What is common is that mortality in children following combat related trauma is  
41 considerably higher than that of paediatric non-combat trauma (2-3%)(86) and adult military  
42 combat casualties (1-3%)(87,88).  
43  
44  
45  
46  
47  
48  
49

50 A wide range of paediatric mortality is reported following mine strikes, ranging from 4-  
51 46%(41,44,62,69-74,83). Shuker et al(89) suggested that approximately half of paediatric  
52 victims die within minutes of mine explosion, likely due to penetrating head injury, and  
53 catastrophic haemorrhage causing non-survivable injuries, in keeping with adult  
54 literature(87,88). Time critical injuries following blasts may represent particular problems in  
55 LMIC's, where pre-hospital evacuation chains may be protracted. Coupland(90) noted that in  
56 1991, only 14% of paediatric and adult ERW victims were admitted in under six hours, while  
57  
58  
59  
60



1  
2  
3 the majority (58%) were admitted between 6-24 hours and 28% presented after 24 hours.  
4 Even in recent conflicts, Bitterman et al(13) found <10% of children presented within 1 hour,  
5 with over a third presenting after 6 hours. Protracted evacuation of paediatric victims add to  
6 blast mortality, reinforced by studies observing a 85-91% mortality of children either at scene  
7 or en-route to health facilities(73,89).  
8  
9  
10

## 11 **Vascular injuries**

12  
13 Penetrating injuries occur in 38-76% of blast-exposed children (9,10,14,16,33,36,37,55), with  
14 incidence greater in older children aged 10-16 compared to 0-10 year olds (65-83% vs 47-  
15 63%)(22,52). In keeping with penetrating injury patterns, vascular injury was observed in 3-  
16 12% of children following blast trauma (9,32,33,37), considerably higher compared to non-  
17 blast conflict trauma where vascular injury occurred in 0.6-1% of paediatric  
18 victims(9,10,24,32,53).  
19  
20  
21  
22  
23  
24  
25

26 Vascular damage and subsequent haemorrhage following explosions have been identified as  
27 a significant cause of childhood fatalities, ranging from the primary cause of death in 21-38%  
28 during the Syrian Civil War(63,64) to 63% following IED and suicide attacks in Pakistan(67),  
29 while mortality rates following penetrating injuries in civilian settings are considerably lower  
30 (5%)(32). Extremity trauma was most highly associated with vascular injuries, with the majority  
31 of vascular injuries occurring in the lower limb (38-58%) followed by the upper limbs (25-  
32 28%)(17,32). This is in keeping with adult data where 54% of injuries were sustained to the  
33 extremities(87). Despite its high prevalence, extremity vascular wounds confer reduced risk of  
34 death compared to vascular damage within the torso, attributed as the primary cause of death  
35 in 71% of paediatric deaths and conferring a four-fold increased risk of death compared to  
36 extremity vascular injuries(32).  
37  
38  
39  
40  
41  
42  
43

44 Data on vascular damage is clear: older children and adolescents sustain similar rates of  
45 vascular injury to adults, particularly to the extremities, while mortality following penetrating  
46 trauma is primarily the result of injuries to the vasculature within the torso.  
47  
48  
49

## 50 **Head injuries**

51  
52 The prevalence of head injuries following blasts are diverse, ranging from 6-54%  
53 (10,11,40,42,43,47-49,53,13,16,18,32,33,36,38,39), while adult combat data ranges from 16-  
54 29%(87). This variation is due to the heterogenous definitions of head injury described in these  
55 studies, with few studies differentiating between superficial scalp wounds, blunt traumatic  
56 brain injury (TBI) or penetrating TBI. Where head injuries were documented, TBI was recorded  
57  
58  
59  
60

1  
2  
3 in 21-62% of paediatric victims, of which 38-39% were defined as penetrating(33,45,48).  
4 Unsurprisingly, papers noted over double the incidence of paediatric penetrating head injury  
5 in blast trauma compared to mainly blunt civilian trauma (13% vs 6%), while the reverse was  
6 true in closed head injuries, with half the incidence of closed head injuries in blast injuries  
7 compared to civilian trauma (22% vs 44%)(9).  
8  
9  
10

11  
12 Cerebral haemorrhage and direct cranial damage following blast have been attributed as a  
13 leading cause of death in children, responsible for 46-71% of fatalities (36–38,43,101).  
14 Creamer(38) noted penetrating wounds to the head accounted for 44% of child deaths in the  
15 emergency department while open skull fractures with cerebral evisceration was documented  
16 in 88% of paediatric fatalities following the 1995 Oklahoma City bombings(102). While  
17 penetrating head injuries undoubtedly carry high mortality, Woods(34) noted that 8 children  
18 survived to hospital discharge despite penetrating head injuries deemed initially unsurvivable,  
19 suggesting such are not unequivocally fatal.  
20  
21  
22  
23  
24

25  
26 Er et al(43) noted that children were more likely to be injured in the head compared to adults  
27 (54% vs 40%) following aerial and shelling during the Syrian Civil War, while young children  
28 aged between 0-4 year old were more likely to undergo neurosurgical procedures compared  
29 to other ages(20,51), 48% of which were craniectomies or craniotomies for penetrating brain  
30 injury, mainly secondary to IED blasts(51). Suggested reasons for this increase may relate to  
31 anatomical predispositions, particularly in infants, such as large head to body ratios in addition  
32 to reduced skull rigidity(22) as well as the relatively shorter distance from the head to ground-  
33 based ERW and IEDs compared to adults(18,22,62,84,89).  
34  
35  
36  
37  
38

39  
40 There is a clear lack of studies investigating long term outcomes following blast- associated  
41 head injuries. While significant cognitive, intellectual and functional sequelae arising from non-  
42 blast TBI (nbTBI) have been described, controversy exists as to whether nbTBI is analogous  
43 to blast-induced TBI(91), and the paucity of paediatric data means this comparison is even  
44 more problematic.  
45  
46  
47

48  
49 A unifying message is that head injuries are associated with high morbidity and mortality in  
50 paediatric blast trauma, while the long term consequences remain largely unknown. Head  
51 injuries are commonly penetrating compared to civilian practice, and increased operative  
52 demand in infants and toddlers for neurosurgical procedures may stretch medical service  
53 expertise.  
54  
55  
56

### 57 **Facial and ocular injuries**

58  
59  
60

1  
2  
3 Blasts result in injury to the face in between 27-48% of paediatric victims, compared to 12%  
4 resulting from GSW(11,18,49) and 10% in adults(87). Relative to other blast related injuries,  
5 facial injuries in isolation are associated with reduced mortality(18). However, Gataa (65)  
6 noted that of the patients presenting with facial injuries, 29% had concomitant eye injury, 22%  
7 had TBI, while life-threatening facial bleeding occurred in 10% of patients. In addition to  
8 physical sequelae, facial injuries are associated with functional and psychological disorders  
9 stemming from stigmatisation of disfiguring injuries with implications for future social,  
10 economic and marital prospects(65).  
11  
12  
13  
14  
15

16  
17 Despite only comprising of 0.3% of the anterior body surface, the eye is sensitive to blast  
18 injury, with ocular injuries in 4-28% of children following trauma related to combat or ERW  
19 (13,16,36,38,39,42,45,53,79). In keeping with patterns of facial injury, an increased  
20 prevalence of eye injury is associated with blast injuries compared to GSW (13% vs 3%)(11).  
21 Landmines are often associated with multiple foreign bodies on the conjunctiva, cornea and  
22 sclera, in addition to sight-threatening injuries such as enucleation or eye globe  
23 perforation(41). Monocular enucleation was observed in 4%, while bilateral enucleation, and  
24 hence blindness, was more common (14%)(41,79). When compared to adult victims of  
25 landmines and cluster bombs, children have more eye injuries (14% vs 8%)(78) as well as  
26 twice the prevalence of eye globe perforation (28% vs 14%)(43) and complete loss of vision  
27 (21 vs 10%)(62). Without adequate support, both monocular and bilateral vision loss may  
28 translate to developmental and educational deficiencies in the growing child.  
29  
30  
31  
32  
33  
34  
35

36  
37 Facial and eye injuries are frequent following exposure to blasts, and should raise suspicion  
38 of intracranial injury. Important are the social and education implications of these disfiguring  
39 injuries in the growing child.  
40  
41

### 42 **Torso Injuries**

43  
44  
45 Following blast injury, trauma to the torso is common, varying from 12-46% between studies  
46 (11,13,41,43,47-49,67,16-18,32,36,38-40) and peaking in 5-10 year olds(22,33). Er et al.'s  
47 (43) study on civilian paediatric injuries during the Syrian Civil War noted that the abdomen  
48 was less commonly injured compared to adults (12 vs 20%), while chest injury with  
49 accompanying lung contusion was present in 51% of children with torso injuries, compared to  
50 35% in adults. Both chest and abdominal injuries from blast are typically classed as  
51 'severe'(18). Abdominal injuries accounted for 18-19% of injury specific deaths following blast  
52 in the paediatric population, while chest injuries have been attributed to 8% of deaths in the  
53 ED(16). Explanations for this susceptibility to severe and life threatening torso injuries include  
54 a lack of body armour compared to adult combat victims and the observation that children  
55  
56  
57  
58  
59  
60

1  
2  
3 have flexible rib cages allowing greater damage to underlying structures without rib fracture,  
4 contributing to the increase in lung contusion observed(32).  
5  
6

7 When organ specific injuries were examined, blast was most likely to cause open penetrating  
8 wounds of the bowel and intra-abdominal organs, affecting the small intestine in over a third  
9 (34%) and the liver, spleen or pancreas in 36%(16,54,61). Where internal organ damage was  
10 sustained, injury specific mortality almost doubled from 15 to 29%(63). These injuries were  
11 frequently contaminated due to bowel rupture, requiring multiple procedures and a high rate  
12 of antibiotic usage(57). The thinner abdominal walls, reduced intraabdominal fat and larger  
13 solid organs relative to the body cavity increases likelihood of visceral damage following  
14 penetrating trauma, while delayed signs of visceral damage support the role of repeated  
15 examination and radiological input, even in the absence of external damage.  
16  
17  
18  
19  
20  
21

22 In the context of total operative procedures performed, laparotomies comprised a significant  
23 component of total surgical workload, encompassing 12-23% of all paediatric procedures  
24 performed(25,58,92). Children were more likely to require laparotomies following combat  
25 trauma compared to paediatric non-combat, and primarily blunt, abdominal trauma (13 vs 2%).  
26 Children in combat zones were also twice as likely to undergo laparotomies compared to US  
27 service personnel (12% vs 6%)(68). In addition to the high prevalence of abdominal injuries,  
28 children frequently swallow air when frightened or in pain, resulting in gastric dilation. As well  
29 as increasing vomiting risk, this may erroneously suggest abdominal injury(89) and lead to  
30 laparotomy. Despite this, Arafat et al(61) noted that only 8% of laparotomies were negative,  
31 supporting the role of explorative laparotomies in penetrating trauma following blasts.  
32  
33  
34  
35  
36  
37  
38

39 Compared to both adults and children in non-conflict settings, the blast injured child is more  
40 likely to sustain injuries to the chest. While abdominal injuries are less frequent, they are more  
41 likely to involve visceral damage and require operative management compared to adult  
42 combat trauma.  
43  
44  
45

### 46 47 **Extremity injuries**

48

49 Extremity injury is one of the defining features following blast related trauma. Extremity injuries  
50 within conflict zones are observed in just under half of children (45%), its prevalence  
51 increasing in blast injuries (69%)(49), with a retrospective study finding 100% of traumatic  
52 amputations and 96% of bone injuries to hand and foot were secondary to blast injuries(39).  
53  
54  
55

56 Studies describe extreme variation in the prevalence of upper limb injuries following blasts,  
57 ranging from 6-74% (13,25,40,41,47,48,58,67,69,29,32,33,35-39), with the greatest upper  
58 limb injury reported following UXO and cluster munition strike(41,44). Compared to adult and  
59  
60

1  
2  
3 particularly following ERW blast, children were more likely to sustain upper limb injuries  
4 (62,67,70–73) with a corresponding increase of 150-300% requiring operative amputation,  
5 typically at the level of the finger (37,66,71,72). Traumatic amputation of the upper limb was  
6 common and limited to the hands in 44-94% of children sustaining upper limb injuries(38,41),  
7 while trans-radial and trans-humeral amputation was less frequent (14-34%)(25,48) but were  
8 more likely to be bilateral(79). Arm fractures necessitating surgical fixation were observed in  
9 45%(29), while upper limb vasculature was commonly disrupted(17,32,48).

10  
11 Similarly, prevalence of lower limb injuries shows variation between studies on blast affecting  
12 25-86% of children(13,25,48,67,29,35–38,40,41,47), with landmine strikes particularly  
13 associated with lower limb injury(35,37,41); 20-29% required operative amputations, normally  
14 at the trans-tibial plane(37,38,79). Lower limb injuries were less common in children compared  
15 to adults(62,70,72–74), with incidence lowest in 0-3 year olds(22), while increasing in  
16 adolescents to mirror adults(62). Traumatic amputations were less frequent compared to the  
17 upper limb, occurring in 14-35% of lower limb injuries(25,41,48).

18  
19 Landmines drive debris, footwear and clothing upward between planes of the soft tissues and  
20 bone, leading to degloving injuries of the leg, perineum and lower abdominal viscera, as well  
21 creating serious potential for soft tissue and bone infection in the remaining limb(84,90). While  
22 large bony defects of the lower limb are problematic in children(93), reconstruction with limited  
23 shortening (<2 cm) has been associated with good outcomes, with the capability for highly  
24 active growth plates to remodel and compensate for this (39,94). However, 75% of new growth  
25 occurs in the distal femur and tibia growth plates, with the distal limb most prone to explosive  
26 disruption(84).

27  
28 The long term physical, psychosocial and financial repercussions of amputation must not be  
29 underestimated. Physical complications are greatest following TA and below knee  
30 amputations, and include anterior and varus bowing, heterotopic ossification and osseous  
31 overgrowth requiring operative or prosthetic revision(95). Overgrowth is particularly  
32 problematic in younger patients (under 12 years), with 15% of patients sustaining amputations  
33 requiring re-vision of their stump. Protracted phantom limb sensation (PLS) and phantom limb  
34 pain (PLP) is reported in over 50% of children following blast related amputation, similar to  
35 that seen in adult literature following blasts(96), yet over five times higher than in children  
36 requiring amputation following non-traumatic indications such as malignancy. Increased PLS  
37 has been reported in lower limb amputations, while PLP was increased in upper limb  
38 amputations (22,100). Social acceptance of the child amputee is culturally specific, with  
39 stigmatisation in certain cultures negatively impacting the child's psychological, social and  
40 educational status(97). While there is a paucity of outcome and long term costing studies in  
41  
42  
43  
44  
45  
46  
47  
48  
49  
50  
51  
52  
53  
54  
55  
56  
57  
58  
59  
60

LMICs, the financial burden of prolonged rehabilitation and repeated revision of prosthesis on the children and host country's health system is likely to be considerable(97).

Like adults involved in blast trauma, older and adolescents children are prone to extremity injury, particularly of the upper limb, while infants and toddlers experience less extremity injuries. Limb injury causes diverse complications in the growing child with increased requirement for re-revision compared to adults.

### **Burn injuries**

Multiple retrospective studies have noted that the majority of burns in children result from civilian mechanisms such as scalding, open fires and flash burns from household cooking fuels (15,16,46,98,99), while approximately 9-12% is the result of high-order explosives observed in combat blast modalities(46,99), less than observed in adult combat populations (52%)(100). Unlike civilian mechanisms however, blast-induced burns rarely occur in isolation, with multidimensional injuries playing a significant role in the child's prognosis(33,50,99). While post-mortem findings following the Syrian Civil War attributed only 0.5% of deaths being secondary to burns(63), conflict-related burn victims had higher mortality compared to non-conflict related burn victims (47% vs 3%)(98), and significantly greater than blast related burns in adult military populations (5%)(100). Severe burns following blasts were sustained in 30% of children, and fatal in 36-40%(18,40).

Creamer(38) noted the median age of burn victims as 6 years old. At this young age, the anatomical disproportionality of the child increases the total body surface area (TBSA), resulting in significant burn surface area (BuSA). Thus, approximately half of paediatric burns in conflict zones result in BuSA >15% (32,127), while 13% of children have BuSA exceeding 40%(127). A high BuSA exceeding 40% has been linked to myocardial damage and hypotension, making hemodynamic management challenging, while complications including nosocomial infection of the burn eschar and pneumonia are not uncommon(98). Within LMICs, protein loss and weight based fluid resuscitation is complicated by malnourishment, while cold fluids may accentuate hypothermia(46).

In conflict related burns, the head and neck are most frequently affected, potentially leading to thermal inhalation injuries(50,99). Thermal inhalation injuries in paediatric victims are difficult to assess, and clues to inhalational injuries such as increased respiratory rate may be incorrectly interpreted in the context of physiological age discrepancies. In addition the paediatric subglottis represents the narrowest section of the upper airway, and deteriorates rapidly from burn-induced laryngeal oedema, especially in the context of failed intubation

1  
2  
3 attempts(101) leading to rapid oxygen desaturation. Between 21-33% of children were  
4 identified as having inhalational injuries requiring pre-emptive or immediate intubation to  
5 protect the airways(50,53), similar to that seen in adult combat casualties (26%)(100). Of this  
6 paediatric cohort with inhalational injuries, 39% died(50), significantly greater than in adult  
7 populations (4%)(100).  
8  
9  
10

11  
12 Prognosticating factors noted for burns include increased time to presentation, prolonged  
13 hospital length of stay and requirement for critical care input(98). This relates to the resource-  
14 intensive management of the paediatric burns patient. Like adults, hospital length of stay for  
15 burns patients are 2-3 times that of the general paediatric population(36,99), while ICU  
16 requirements are increased, particularly in burns secondary to blast injuries(98,99). Operative  
17 demands of paediatric burn victims are significant. Children aged 6 months to 3 years were  
18 between 4-14 times more likely than adults to require surgical input , reflecting the significant  
19 burden of burns (39% of this cohort compared to 2-6% in adults(102)). While other conditions  
20 may be treated by a single operation, burns often require serial procedures(102), with an  
21 average 2 operations per patient. This creates a disproportionate operative volume in both  
22 adults and paediatric patients compared to other surgical emergencies(102). Burns induced by  
23 blast injuries require more escharotomies (27% vs 4%  $P<0.001$ ) and fasciotomies (67% vs  
24 30%  $P=0.002$ ) when compared to civilian burn mechanisms(98).  
25  
26  
27  
28  
29  
30  
31  
32

33  
34 Additionally, the requirement for post-operative support and rehabilitation add to the resource  
35 requirements. Children are rarely left without functional sequelae, with limited joint mobility  
36 and impaired tactile sensation presenting significant future challenges for rehabilitation(103),  
37 while high rates of psychological morbidity including suicidal ideation have been reported in  
38 adolescents(104). Under-resourcing psychological and functional rehabilitation will likely lead  
39 to high rates of morbidity and mortality(102). The degree to which these services are available  
40 within conflict zones and LMICs is uncertain. Ethical questions naturally arise when performing  
41 interventions where health systems are unlikely to address a child's long term needs.  
42 Examination of existing paediatric burn services within zones of interest and longer term follow  
43 up of paediatric blast burn patients are required to determine the problems and needs for this  
44 cohort.  
45  
46  
47  
48  
49  
50  
51

## 52 **Service provision**

53

54  
55 Relative to total admissions, paediatric victims affected by blasts constitute a  
56 disproportionately large resource burden on operative workload, as well as intensive care and  
57 hospital beds. Approximately 47-82% of paediatric blast victims require  
58 surgery(22,33,36,58,61), particularly adolescents(22). The requirement for multiple operative  
59  
60

1  
2  
3 procedures were common in the paediatric cohort, especially in burn and orthopaedic surgery  
4 due to the requirement for surgical revision (34-80% of children required  $\geq 2$   
5 procedures(16,18,36,38–40,42,54); 25% required  $\geq 4$  procedures)(16). Operative requirement  
6 was greatest in 9-14 year olds, requiring on average 5 procedures per patient, prolonged ICU  
7 and hospital stay, while 0-3 year olds required the least operative management(20). This study  
8 suggested the reduced requirement for operative input in 0-3 year olds may be due not only  
9 to the reduced burden of extremity injuries requiring repeated debridement, but potentially  
10 because the equipment was inappropriate for this young cohort. This is supported by  
11 observations that infants and young children aged 0-10 years old with an Injury Severity Score  
12  $\geq 15$  were 4x less likely to go to surgery compared to adults, while adolescents (11-15 years)  
13 were 2x more likely to receive operative input(22).

21 Multidisciplinary surgical services were required in 80% of patients, with orthopaedic, plastic,  
22 general neurosurgical, ophthalmic and vascular surgeons often working in partnership(48).  
23 Debridement and primary skin closure represented the most common procedure, in 35-100%  
24 of studies(25,29,36–38,47,58,68), in keeping with shrapnel injuries leading to multiple and  
25 frequently contaminated superficial injuries(29,47). Children are likely to do well with thorough  
26 debridement, with well perfused tissues allowing optimal healing and scar formation(39,94).

31 Retrospective studies of US military medical treatment facilities (MTF) in Afghanistan have  
32 found that while children comprised only 3-6% of their total admissions, this demographic  
33 required approximately double the total bed spaces (7-11%)(14,19,53), and on average 3x the  
34 length of stay (LOS) of coalition troops admitted over the same time period(14,68).  
35 Approximately 40% of paediatric admissions required a LOS exceeding 7 days, while, in half  
36 , the LOS exceeded 14 days(10,33). Spinella et al noted that while children aged 11-17 were  
37 the greatest proportion of children occupying beds, <1 year old cohort had the longest  
38 stay(68). This contrasts with other studies finding young children <8 years old had the shortest  
39 LOS, while children(8-14 years old) had the longest(14,18).

46 A similar burden is observed in the intensive care unit (ICU), with between 20-45% children  
47 requiring ICU admission(5,30,33,36,43,50,53,54,61), the majority following explosive or  
48 ballistic trauma. Children were often younger (0-10 years old)(22), with one recent study noting  
49 children aged <1 year and 1-4 years most often requiring admission (53 & 66%  
50 respectively)(30). Children under 8 required a ICU LOS over twice that of children aged >8  
51 years (52). Harris et al(5) noted that despite representing only 12% of admissions, children  
52 occupied on average 35% of ICU beds, with a brief surge in numbers resulting in 100%  
53 occupancy from children, the majority requiring ventilatory and ionotropic support. This  
54 specialised service was often provided by non-paediatric experts, which could result in 2  
55  
56  
57  
58  
59  
60



1  
2  
3 healthcare providers per paediatric patient(5). Ventilatory equipment is often age specific, and  
4 although multiple examples of ingenuity and adaptation of adult equipment exist(5,54),  
5 children may overwhelm the unprepared MTF.  
6  
7

8  
9 One of the key challenges is providing sustainable health services in the host country. MTFs  
10 may be capable of delivering exceptional paediatric care in the acute phase following blasts,  
11 but recovery from morbidity is dependent on long term rehabilitation(94) normally provided by  
12 the host country. Not only can this place exceptional strain on local health authorities, but if  
13 provisions are not available, the child is likely to undergo a protracted decline(5,94).  
14  
15  
16

17  
18 Reasons for the high rate of admission and prolonged stay may be multifactorial. Admission  
19 criteria for host nationals to a coalition MTF typically require threat to life, limb, or eyesight,  
20 with resulting prolonged stay. Interestingly however, children with mild to moderate traumata  
21 are three times more likely than adults to be admitted (22). This may reflect a lack of certainty  
22 in initial assessment of injury severity from health practitioners unaccustomed to dealing with  
23 children. Within conflict zones, rearwards evacuation of civilians is not always possible, and  
24 health interventions such as ventilatory support may not be sustainable by host countries  
25 without deterioration in service standards, leading to prolonged admission until the child can  
26 be safely moved(5).  
27  
28  
29  
30  
31  
32

33 Following up recovery is a recurring theme when exploring long term challenges of blast  
34 injuries in children(6). Children are a complex cohort to monitor. Geographical displacement,  
35 particularly in the context of a conflict, increases the likelihood of this vulnerable cohort being  
36 lost to follow-up. This can impact not only the child's rehabilitation and coordination with local  
37 health authorities, but also cause difficulty in assessing long-term functional outcomes which  
38 are needed to detect future health needs. Increasingly there is recognition of the need for  
39 formalised trauma registries accessible in the host country, assisting the follow-up of this  
40 vulnerable demographic(6,18,19,53).  
41  
42  
43  
44  
45  
46

## 47 **Conclusion**

48  
49  
50 Apart from their focus on paediatric blast, all the papers in this review have one thing in  
51 common. Their research is based on those child patients injured by blast in conflict zones,  
52 post-conflict zones and low resource environments. Most paediatric blast injury is inflicted in  
53 these settings but is not exclusive to them. In Britain in May 2017, a bomb detonated at the  
54 Manchester Arena killing 23 people and injuring 139, most of whom were children. The attack  
55 placed a sudden and significant burden on medical services in the city, which had no  
56 experience of paediatric blast injury in the 21<sup>st</sup> century, let alone on this kind of scale.  
57  
58  
59  
60

1  
2  
3 Wherever in the world they live, and whatever the circumstances of the explosion, the social  
4 and anatomical profile of children makes them uniquely vulnerable to one of the most complex  
5 and demanding trauma conditions that any medical professional or system can treat. This  
6 paper has characterised paediatric blast as a diverse injury pattern, which must be seen as  
7 distinct from its adult equivalent. This pattern should be fully understood from point of  
8 wounding through the post-operative and rehabilitation phases of treatment. This continuum  
9 approach would enable both better long-term care of the patient, and improved support of  
10 medical systems bearing the intense burden of that care.  
11  
12

13  
14  
15  
16 It remains to be seen whether the monitoring of the long term effects of paediatric blast injury  
17 in well-resourced environments is any better than that in areas of instability. Monitoring of  
18 patient outcomes should be integrated with the monitoring of treatment so that relevant  
19 practice and skills can be continually assessed. It is urgent that the understanding of  
20 paediatric blast injury is given focus and structure, not just for the likely significant patient  
21 cohort of the future but for those suffering today as blast injured children surviving into blast-  
22 blighted adulthood, wherever they live in the world.  
23  
24  
25  
26  
27  
28  
29

### 30 Acknowledgments

31  
32 The authors are grateful to Dr David Inwald for his detailed comments on this review.  
33  
34  
35  
36  
37  
38  
39  
40  
41

### 42 References

- 43 1. Frost A, Boyle P, Autier P, King C, Zwijnenburg W, Hewitson D, et al. Articles The  
44 effect of explosive remnants of war on global public health: a systematic mixed-  
45 studies review using narrative synthesis. *Lancet Public Heal*. 2017;2(2):e286–96.  
46  
47
- 48 2. Wolf SJ, Bebarta VS, Bonnett CJ, Pons PT, Cantrill S V. Blast injuries. *Lancet*. 2009  
49 Aug;374(9687):405–15.  
50  
51
- 52 3. Champion HR, Holcomb JB, Young LA. Injuries from explosions: physics, biophysics,  
53 pathology, and required research focus. *J Trauma*. 2009;66(May):1468–1477;  
54 discussion 1477.  
55  
56  
57
- 58 4. UNICEF. United Nations Convention on the Rights of the Child [Internet]. 1989 [cited  
59 2017 Sep 1]. Available from: <https://downloads.unicef.org.uk/wp->  
60

- content/uploads/2010/05/UNCRC\_united\_nations\_convention\_on\_the\_rights\_of\_the\_child.pdf?\_ga=2.85767705.181858325.1504263661-1041319099.1504263661
5. Harris CC, McNicholas JJ. Paediatric intensive care in the field hospital. *J R Army Med Corps.* 2009;155(2):157–9.
  6. Bull A, Mayhew E, Reavley P, Tai N, Taylor S. Comment Paediatric blast injury : challenges and priorities. *Lancet child Adolesc Heal.* 2018;4642(18):20–1.
  7. Bree S, Wood K, Nordmann GR, Mcnicholas J. The Paediatric Transfusion Challenge on Deployed Operations. 156.
  8. Diana G, Msn R, Sally K, Singh T. Using System Change as a Method of Performance / Quality Improvement ... 2010;
  9. Aharonson-Daniel L, Waisman Y, Dannon YL, Peleg K. Epidemiology of Terror-Related Versus Non-Terror-Related Traumatic Injury in Children. *Pediatrics.* 2003 Oct;112(4):e280–e280.
  10. Aharonson-Daniel L, Klein Y, Peleg K. Suicide bombers form a new injury profile. *Ann Surg.* 2006 Dec;244(6):1018–23.
  11. Amir LD, Aharonson-Daniel L, Peleg K, Waisman Y, Alfici R, Ishtov E, et al. The severity of injury in children resulting from acts against civilian populations. *Ann Surg.* 2005 Apr;241(4):666–70.
  12. Bilukha OO, Leidman EZ, Sultan A-SSSS, Jaffar Hussain S. Deaths due to Intentional Explosions in Selected Governorates of Iraq from 2010 to 2013: Prospective Surveillance. *Prehosp Disaster Med.* 2015 Dec 30;30(6):586–92.
  13. Bitterman Y, Benov A, Glassberg E, Satanovsky A, Bader T, Sagi R, et al. Role 1 Pediatric Trauma Care on the Israeli-Syrian Border-First Year of the Humanitarian Effort. *Mil Med.* 2016 Aug;181(8):849–53.
  14. Borgman M, Matos RI, Blackbourne LH, Spinella PC. Ten years of military pediatric care in Afghanistan and Iraq. *J Trauma Acute Care Surg.* 2012 Dec;73(6 SUPPL. 5):S509–13.
  15. Borgman MA, Matos RI, Spinella PC. Isolated pediatric burn injury in Iraq and Afghanistan. *Pediatr Crit Care Med.* 2015;16(2):e23–7.
  16. Creamer KM, Edwards MJ, Shields CH, Thompson MW, Yu CE, Adelman W. Pediatric Wartime Admissions to US Military Combat Support Hospitals in Afghanistan and Iraq: Learning from the First 2,000 Admissions. *J Trauma - Inj Infect Crit Care.*

- 2009 Oct;67(4):762–8.
17. Dua A, Via KC, Kreishman P, Kragh JF, Spinella PC, Patel B, et al. Early management of pediatric vascular injuries through humanitarian surgical care during U.S. military operations. In: *Journal of Vascular Surgery*. 2013. p. 695–700.
  18. Edwards MJ, Lustik M, Eichelberger MR, Elster E, Azarow K, Coppola C. Blast injury in children: an analysis from Afghanistan and Iraq, 2002-2010. *J Trauma Acute Care Surg*. 2012 Nov;73(5):1278–83.
  19. Edwards MJ, Lustik M, Burnett MW, Eichelberger M. Pediatric inpatient humanitarian care in combat: Iraq and Afghanistan 2002 to 2012. *J Am Coll Surg*. 2014;218(5):1018–23.
  20. Edwards MJ, Lustik M, Carlson T, Tabak B, Farmer D, Edwards K, et al. Surgical interventions for pediatric blast injury: an analysis from Afghanistan and Iraq 2002 to 2010. *J Trauma Acute Care Surg*. 2014 Mar;76(3):854–8.
  21. Hillman CM, Rickard A, Rawlins M, Smith JE. Paediatric traumatic cardiac arrest: Data from the joint theatre trauma registry. *J R Army Med Corps*. 2016 Aug;162(4):276–9.
  22. Jaffe DH, Peleg K. Terror explosive injuries: a comparison of children, adolescents, and adults. *Ann Surg*. 2010 Jan;251(1):138–43.
  23. Khan I, Khan N, Naeem R, Kerai S, Allen K, Zia N, et al. Bomb blast injuries: an exploration of patient characteristics and outcome using Pakistan National Emergency Departments Surveillance (Pak-NEDS) data. *BMC Emerg Med*. 2015;15 Suppl 2:S7.
  24. Kluger Y, Peleg K, Daniel-Aharonson L, Mayo A. The special injury pattern in terrorist bombings. *J Am Coll Surg*. 2004;199(6):875–9.
  25. Mckechnie PS, Wertin T, Parker P, Eckert M. Pediatric Surgery Skill Sets in Role 3: The Afghanistan Experience. *Mil Med*. 2014 Jul;179(7):762–5.
  26. Naylor JF, April MD, Roper JL, Hill GJ, Clark P, Schauer SG. Emergency department imaging of pediatric trauma patients during combat operations in Iraq and Afghanistan. 2018;620–5.
  27. Neff LP, Cannon JW, Morrison JJ, Edwards MJ, Spinella PC, Borgman MA, et al. Clearly defining pediatric massive transfusion: cutting through the fog and friction with combat data. *J Trauma Acute Care Surg*. 2015;78(1):22-8; discussion 28-9.
  28. Patregnani JT, Borgman MA, Maegele M, Wade CE, Blackbourne LH, Spinella PC.

- 1  
2  
3 Coagulopathy and shock on admission is associated with mortality for children with  
4 traumatic injuries at combat support hospitals. *Pediatr Crit Care Med.*  
5 2012;13(3):273–7.  
6  
7  
8  
9 29. Quintana DA, Jordan FB, Tuggle DW, Mantor PC, Tunell WP, Parker JR, et al. The  
10 spectrum of pediatric injuries after a bomb blast. *J Pediatr Surg.* 1997 Feb;32(2):307–  
11 11.  
12  
13  
14 30. Schauer SG, Hill GJ, Naylor JF, April MD, Borgman M, Beberta VS. Emergency  
15 department resuscitation of pediatric trauma patients in Iraq and Afghanistan. *Am J*  
16 *Emerg Med.* 2018 Jan;1–5.  
17  
18  
19 31. Smith JEE, Kehoe A, Harrison SEE, Russell R, Midwinter M. Outcome of penetrating  
20 intracranial injuries in a military setting. *Injury.* 2014 May;45(5):874–8.  
21  
22  
23 32. Villamaria CY, Morrison JJ, Fitzpatrick CM, Cannon JW, Rasmussen TE. Wartime  
24 vascular injuries in the pediatric population of Iraq and Afghanistan: 2002-2011. *J*  
25 *Pediatr Surg.* 2014 Mar;49(3):428–32.  
26  
27  
28 33. Waisman Y, Aharonson-Daniel L, Mor M, Amir L, Peleg K. The impact of terrorism on  
29 children: a two-year experience. *Prehospital Disaster Med.* 2003;18(3):242–8.  
30  
31  
32 34. Woods KL, Russell RJ, Bree S, Mahoney PF, McNicholas J. The pattern of paediatric  
33 trauma on operations. *J R Army Med Corps.* 2012 Mar;158(1):34–7.  
34  
35  
36 35. Al-Worikat AF. Landmine amputees referred to the Royal Medical Services-Jordan.  
37 *Prosthet Orthot Int.* 2001 Aug;25(2):108–12.  
38  
39  
40 36. Arul GS, Reynolds J, DiRusso S, Scott A, Bree S, Templeton P, et al. Paediatric  
41 admissions to the British military hospital at Camp Bastion, Afghanistan. *Ann R Coll*  
42 *Surg Engl.* 2012 Mar;94(1):52–7.  
43  
44  
45 37. Bajec J, Gang RK, Lari AR. Post Gulf war explosive injuries in liberated Kuwait. *Injury.*  
46 1993 Sep;24(8):517–20.  
47  
48  
49 38. Beitler AL, Wortmann GW, Hofmann LJ, Goff Jr JM. Operation Enduring Freedom: the  
50 48th Combat Support Hospital in Afghanistan. *Mil Med.* 2006;171(3):189–93.  
51  
52  
53 39. Bertani A, Mathieu L, Dahan J-L, Launay F, Rongieras F, Rigal S. War-related  
54 extremity injuries in children: 89 cases managed in a combat support hospital in  
55 Afghanistan. *Orthop Traumatol Surg Res.* 2015 May;101(3):365–8.  
56  
57  
58 40. C.P. C, B.E. L, T.E. R. Children treated at an expeditionary military hospital in Iraq.  
59 *Arch Pediatr Adolesc Med.* 2006;160(9):972–6.  
60

- 1
- 2
- 3
- 4 41. Can M, Yildirimcan H, Ozkalipci O, Melek M, Edirne Y, Bicer U, et al. Landmine
- 5 associated injuries in children in Turkey. *J Forensic Leg Med.* 2009 Nov;16(8):464–8.
- 6
- 7 42. El H, Agard E, Dot C. Cephalic region war injuries in children : Experience in French
- 8 NATO hospital in Kabul Afghanistan. *Injury.* 2018;49(9):1703–5.
- 9
- 10
- 11 43. Er E, Kerem Ş, Güler S, Aslan Ş, Seviner M, Aksel G, et al. American Journal of
- 12 Emergency Medicine Analyses of demographical and injury characteristics of adult
- 13 and pediatric patients injured in Syrian civil war ☆. 2017;35:82–6.
- 14
- 15
- 16 44. Fares Y, Ayoub F, Fares J, Khazim R, Khazim M, Gebeily S. Pain and neurological
- 17 sequelae of cluster munitions on children and adolescents in South Lebanon. *Neurol*
- 18 *Sci.* 2013 Nov 7;34(11):1971–6.
- 19
- 20
- 21
- 22 45. Fares Y, Fares J, Gebeily S. Head and facial injuries due to cluster munitions. *Neurol*
- 23 *Sci.* 2014 Jun;35(6):905–10.
- 24
- 25
- 26 46. Gurney I. Paediatric casualties during OP TELIC. *J R Army Med Corps.*
- 27 2004;150(4):270–2.
- 28
- 29
- 30 47. Hinsley DE, Rosell PAE, Rowlands TK, Clasper JC. Penetrating missile injuries during
- 31 asymmetric warfare in the 2003 Gulf conflict. *Br J Surg.* 2005 May;92(5):637–42.
- 32
- 33 48. Hodalic Z, Svagelj M, Sebalj I, Sebalj D. Surgical treatment of 1,211 patients at the
- 34 Vinkovci General Hospital, Vinkovci, Croatia, during the 1991-1992 Serbian offensive
- 35 in east Slavonia. *Mil Med.* 1999 Nov;164(11):803–8.
- 36
- 37
- 38
- 39 49. Inwald DP, Arul GS, Montgomery M, Henning J, McNicholas J, Bree S. Management
- 40 of children in the deployed intensive care unit at Camp Bastion, Afghanistan. *J R*
- 41 *Army Med Corps.* 2014 Sep;160(3):236–40.
- 42
- 43
- 44 50. Jeevaratnam JA, Pandya AN. One year of burns at a role 3 medical treatment facility
- 45 in Afghanistan. *J R Army Med Corps.* 2014 Mar;160(1):22–6.
- 46
- 47
- 48 51. Klimo P, Ragel BT, Scott WH, McCafferty R. Pediatric neurosurgery during Operation
- 49 Enduring Freedom. *J Neurosurg Pediatr.* 2010 Aug;6(2):107–14.
- 50
- 51
- 52 52. RI M, JB H, Callahan C, PC S. Increased mortality rates of young children with
- 53 traumatic injuries at a US Army combat support hospital in Baghdad, Iraq, 2004.
- 54 *Pediatrics.* 2008;122(5):e959-66.
- 55
- 56
- 57 53. McGuigan R, Spinella PC, Beekley A, Sebesta J, Perkins J, Grathwohl K, et al.
- 58 Pediatric trauma: experience of a combat support hospital in Iraq. *J Pediatr Surg.*
- 59
- 60

- 1  
2  
3 2007 Jan;42(1):207–10.  
4  
5  
6 54. Nordmann GR. Paediatric anaesthesia in Afghanistan: a review of the current  
7 experience. *J R Army Med Corps*. 2010 Dec;156(4 Suppl 1):323–6.  
8  
9 55. Pannell D, Poynter J, Wales PW, Tien H, Nathens AB, Shellington D. Factors  
10 affecting mortality of pediatric trauma patients encountered in Kandahar, Afghanistan.  
11 *Can J Surg*. 2015 Jun;58(3):S141–5.  
12  
13 56. Pearce P. Preparing to care for paediatric trauma patients. *J R Army Med Corps*.  
14 2015;161(Suppl 1):i52–5.  
15  
16 57. Terzić J, Mestrovic J, Dogas Z, Furlan D, Biocic M. Children war casualties during the  
17 1991-1995 wars in Croatia and Bosnia and Herzegovina. *Croat Med J*.  
18 2001;42(2):156–60.  
19  
20 58. Thompson DC, Crooks RJ, Clasper JC, Lupu A, Stapley SA, Cloke DJ. The pattern of  
21 paediatric blast injury in Afghanistan. *J R Army Med Corps*. 2017 Oct;  
22  
23 59. Walker N, Russell RJ, Hodgetts TJ. British Military Experience of Pre-Hospital  
24 Paediatric Trauma in Afghanistan. 156(3):150–3.  
25  
26 60. Armed US. Pediatric Trauma Experience in a Combat Support Hospital in Eastern  
27 Afghanistan Over 10 Months , 2010 to 2011. 2013;  
28  
29 61. Arafat S, Alsabek MB, Ahmad M, Hamo I, Munder E. Penetrating abdominal injuries  
30 during the Syrian war: Patterns and factors affecting mortality rates. *Injury*. 2017  
31 May;48(5):1054–7.  
32  
33 62. Bendinelli C. Effects of land mines and unexploded ordnance on the pediatric  
34 population and comparison with adults in rural Cambodia. *World J Surg*. 2009 May  
35 16;33(5):1070–4.  
36  
37 63. Celikel A, Karaarslan B, Demirkiran DS, Zeren C, Arslan MM. A series of civilian  
38 fatalities during the war in Syria. *Ulus Travma Acil Cerrahi Derg*. 2014 Sep;20(5):338–  
39 42.  
40  
41 64. Celikel A, Karbeyaz K, Kararslan B, Arslan MM, Zeren C. Childhood casualties during  
42 civil war: Syrian experience. *J Forensic Leg Med*. 2015 Aug;34:1–4.  
43  
44 65. Gataa ISS, Muassa QHH. Patterns of maxillofacial injuries caused by terrorist attacks  
45 in Iraq: Retrospective study. *Int J Oral Maxillofac Surg*. 2011 Jan;40(1):65–70.  
46  
47 66. Hanevik K, Kvåle G. Landmine injuries in Eritrea. 1992;1992.  
48  
49  
50  
51  
52  
53  
54  
55  
56  
57  
58  
59  
60

- 1  
2  
3 67. Mirza FH, Parhyar HA, Tirmizi SZA. Rising threat of terrorist bomb blasts in Karachi--a  
4 5-year study. *J Forensic Leg Med*. 2013 Aug;20(6):747–51.
- 6  
7 68. Spinella PC, Borgman MA, Azarow KS. Pediatric trauma in an austere combat  
8 environment. *Crit Care Med*. 2008;36(7 Suppl):S293–6.
- 10  
11 69. Andersson N, da Sousa CP, Paredes S. Social cost of land mines in four countries:  
12 Afghanistan, Bosnia, Cambodia, and Mozambique. *BMJ*. 1995 Sep;311(7007):718–  
13 21.
- 15  
16 70. Bilukha OO, Brennan M, Woodruff BA. Death and Injury from Landmines and  
17 Unexploded Ordnance in Afghanistan. *J Am Med Assoc*. 2003 Aug 6;290(5):650–3.
- 19  
20 71. Bilukha OO, Brennan M, Anderson M, Tsitsaev Z, Murtazaeva E, Ibragimov R. Seen  
21 but not heard: Injuries and deaths from landmines and unexploded ordnance in  
22 Chechnya, 1994–2005. *Prehosp Disaster Med*. 2007;22(6):507–12.
- 24  
25 72. Bilukha OO, Brennan M, Anderson M. The lasting legacy of war: Epidemiology of  
26 injuries from landmines and unexploded ordnance in Afghanistan, 2002–2006.  
27 *Prehosp Disaster Med*. 2008;23(6):493–9.
- 29  
30 73. Bilukha OO, Laurence H, Danee L, Subedi KP, Becknell K. Injuries and deaths due to  
31 victim-activated improvised explosive devices, landmines and other explosive  
32 remnants of war in Nepal. *Inj Prev*. 2011 Oct 1;17(5):326–31.
- 34  
35 74. Bilukha OO, Becknell K, Laurence H, Danee L, Subedi KP. Fatal and non-fatal  
36 injuries due to intentional explosions in Nepal, 2008–2011: Analysis of surveillance  
37 data. *Confl Health*. 2013;7(1):5.
- 39  
40 75. Guerriero RM, Pier DB, de Gusmao CM, Bernson-Leung ME, Maski KP, Urion DK, et  
41 al. Increased pediatric functional neurological symptom disorders after the Boston  
42 marathon bombings: a case series. *Pediatr Neurol*. 2014 Nov;51(5):619–23.
- 44  
45 76. Guha-Sapir D, Schluter B, Rodriguez-Llanes JM, Lillywhite L, Hicks MH-R. Patterns of  
46 civilian and child deaths due to war-related violence in Syria: a comparative analysis  
47 from the Violation Documentation Center dataset, 2011–16. *Lancet Glob Heal*. 2018  
48 Jan;6(1):e103–10.
- 50  
51 77. Hemmati MA, Shokoohi H, Masoumi M, Khateri S, Soroush M, Modirian E, et al.  
52 Mental health disorders in child and adolescent survivors of post-war landmine  
53 explosions. *Mil Med Res*. 2015;2:30.
- 55  
56 78. Kinra S, Black ME. Landmine related injuries in children of Bosnia and Herzegovina  
57  
58  
59  
60



- 1  
2  
3 1991-2000: comparisons with adults. *J Epidemiol Community Health*. 2003  
4 Apr;57(4):264–5.  
5  
6  
7 79. Mousavi B, Soroush MMRM, Masoumi M, Khateri S, Modirian E, Shokoohi H, et al.  
8 Epidemiological study of child casualties of landmines and unexploded ordnances: A  
9 national study from Iran. *Prehosp Disaster Med*. 2015 Oct 16;30(5):472–7.  
10  
11  
12 80. Pat-horenczyk R, Abramovitz R, Brom D, Chemtob CM. Adolescent Exposure to  
13 Recurrent Terrorism in Israel : Posttraumatic Distress and Functional Impairment.  
14 2007;77(1):76–85.  
15  
16  
17 81. Poor Zamany Nejatkermamy M, Modirian E, Soroush M, Masoumi M, Hosseini M.  
18 Phantom Limb Sensation (PLS) and Phantom Limb Pain (PLP) among Young  
19 Landmine Amputees. *Iran J child Neurol*. 2016;10(3):42–7.  
20  
21  
22  
23 82. Guha-Sapir D, Rodriguez-Llanes JM, Hicks MH, Donneau AF, Coutts A, Lillywhite L,  
24 et al. Civilian deaths from weapons used in the Syrian conflict. *BMJ*. 2015;351(April  
25 2014):1–5.  
26  
27  
28  
29 83. Surrency AB, Graitcer PL, Henderson AK. Key factors for civilian injuries and deaths  
30 from exploding landmines and ordnance. *Inj Prev*. 2007 Jun;13(3):197–201.  
31  
32  
33 84. Watts HG. The consequences for children of explosive remnants of war: Land mines,  
34 unexploded ordnance, improvised explosive devices, and cluster bombs. *J Pediatr  
35 Rehabil Med*. 2009;2(3):217–27.  
36  
37  
38 85. Edwards MJ, Lustik M, Eichelberger MR, Elster E, Azarow K, Coppola C. Blast injury  
39 in children. *J Trauma Acute Care Surg*. 2012 Nov;73(5):1278–83.  
40  
41  
42 86. Regional K, Regional O, Florida I. Comparison of Outcomes for Pediatric Trauma at  
43 Different Types of Trauma Centers : The Unresolved Mystery. 2016;1054–8.  
44  
45  
46 87. Owens BD, Kragh JF, Wenke JC, Macaitis J, Wade CE, Holcomb JB. Combat  
47 wounds in operation Iraqi Freedom and operation Enduring Freedom. *J Trauma*.  
48 2008;64(2):295–9.  
49  
50  
51 88. Eastridge BJ, Salinas J, Ph D, Wade CE, Ph D, Blackbourne LH. Hypotension is 100  
52 mm Hg on the battlefield. *AJS*. 2011;202(4):404–8.  
53  
54  
55 89. Shuker ST. Effect of biomechanism mine explosion on children: Craniofacial injuries  
56 and management. *J Craniofac Surg*. 2013 Jul;24(4):1132–6.  
57  
58  
59 90. Coupland RM, Korver A. Injuries from antipersonnel mines: the experience of the  
60 International Committee of the Red Cross. *BMJ (Clinical Res Ed)*.

- 1  
2  
3 1991;303(6816):1509–12.  
4  
5  
6 91. Rosenfeld J V., Ford NL. Bomb blast, mild traumatic brain injury and psychiatric  
7 morbidity: A review. Vol. 41, *Injury*. 2010. p. 437–43.  
8  
9  
10 92. Ramasamy A, Hinsley DE, Edwards DS, Stewart MPM, Midwinter M, Parker PJ. Skill  
11 sets and competencies for the modern military surgeon : Lessons from UK military  
12 operations in Southern Afghanistan. *Injury*. 2010;41(5):453–9.  
13  
14 93. Franke A, Hentsch S, Bieler D, Schilling T, Weber W, Johann M, et al. Management  
15 of Soft-Tissue and Bone Defects in a Local Population: Plastic and Reconstructive  
16 Surgery in a Deployed Military Setting. *Mil Med*. 2017 Nov;182(11):e2010–20.  
17  
18 94. Nordmann GR, McNicholas JJ, Templeton PA, Arul S, Woods K. Paediatric trauma  
19 management on deployment. *J R Army Med Corps*. 2011;157(3 SUPP. 1).  
20  
21 95. Eichelberger MR. Pediatric surgery and medicine for hostile environments. Vol. 46,  
22 *Journal of Pediatric Surgery*. 2011. 1683 p.  
23  
24 96. Article O. The Experience of Phantom Limb Pain in Patients With Combat-Related  
25 Traumatic Amputations. 2008;  
26  
27 97. Cummings D. Prosthetics in the developing world: a review of the literature. *Prosthet*  
28 *Orthot Int*. 1996;20:51–60.  
29  
30 98. Buyukbese S, Budeyri A. ScienceDirect Mortality risk factors in war-related pediatric  
31 burns : A comparative study among two distinct populations. *Burns*. 2018;1–18.  
32  
33 99. Peleg K, Aharonson-Daniel L, Michael M, Shapira SC, Michaelson M, Rivkind A, et al.  
34 Patterns of injury in hospitalized terrorist victims. *Am J Emerg Med*. 2003;21(4):258–  
35 62.  
36  
37 100. Kauvar DS, Wolf SE, Wade CE, Cancio LC, Renz EM, Holcomb JB. Burns sustained  
38 in combat explosions in Operations Iraqi and Enduring Freedom (OIF/OEF explosion  
39 burns). *Burns*. 2006;32(7):853–7.  
40  
41 101. Sharma RK, Parashar A. Special considerations in paediatric burn patients. *Indian J*  
42 *Plast Surg*. 2010;43:S43-50.  
43  
44 102. Stewart BT, Trelles M, Dominguez L, Wong E, Fiozounam HT, Hassani GH, et al.  
45 Surgical burn care by médecins sans frontières-operations center Brussels: 2008 to  
46 2014. *J Burn Care Res*. 2016;37(6):e519–24.  
47  
48 103. Zeitlin REK, Järnberg J, Somppi EJ, Sundell B. Long-term functional sequelae after  
49  
50  
51  
52  
53  
54  
55  
56  
57  
58  
59  
60

1  
2  
3 paediatric burns. Burns. 1998;24(1):3–6.  
4

- 5 104. Gautam S, Gupta ID, Batra L, Sharma H, Khandelwal R, Pant A. Psychiatric morbidity  
6 among victims of bomb blast. Indian J Psychiatry. 1998 Jan;40(1):41–5.  
7  
8  
9  
10  
11  
12  
13  
14  
15  
16  
17  
18  
19  
20  
21  
22  
23  
24  
25  
26  
27  
28  
29  
30  
31  
32  
33  
34  
35  
36  
37  
38  
39  
40  
41  
42  
43  
44  
45  
46  
47  
48  
49  
50  
51  
52  
53  
54  
55  
56  
57  
58  
59  
60

Confidential: For Review Only

1  
2  
3  
4  
5  
6  
7  
8  
9  
10  
11  
12  
13  
14  
15  
16  
17  
18  
19  
20  
21  
22  
23  
24  
25  
26  
27  
28  
29  
30  
31  
32  
33  
34  
35  
36  
37  
38  
39  
40  
41  
42  
43  
44  
45  
46  
47  
48  
49  
50  
51  
52  
53  
54  
55  
56  
57  
58  
59  
60

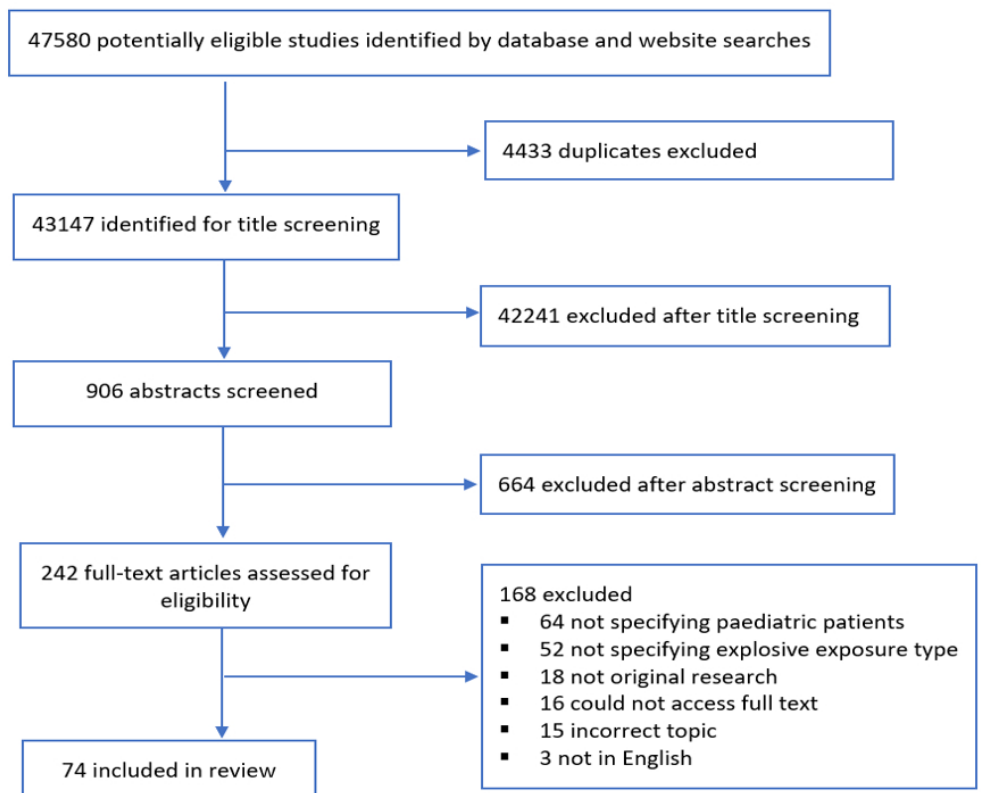

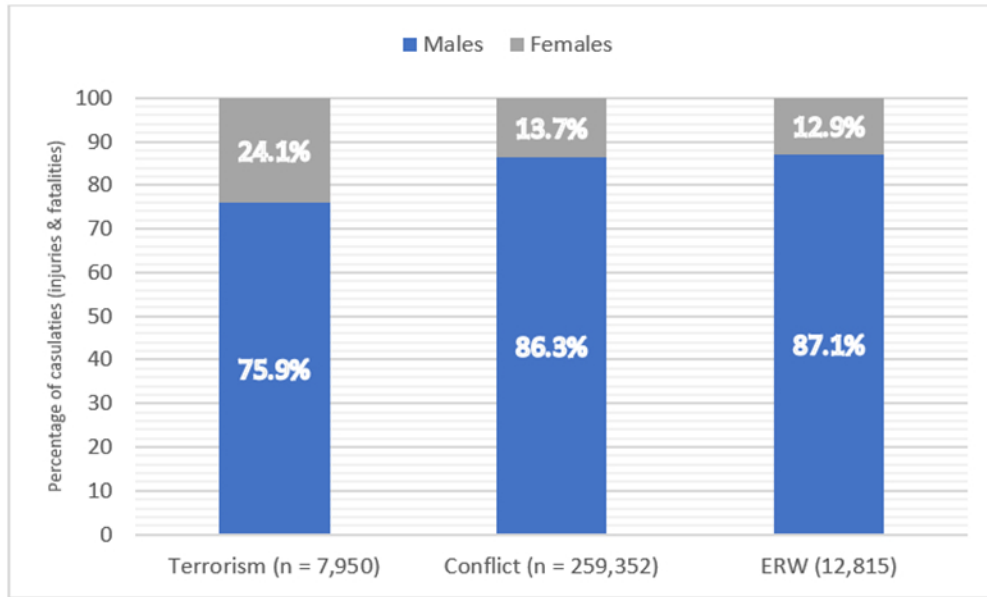

1  
2  
3  
4  
5  
6  
7  
8  
9  
10  
11  
12  
13  
14  
15  
16  
17  
18  
19  
20  
21  
22  
23  
24  
25  
26  
27  
28  
29  
30  
31  
32  
33  
34  
35  
36  
37  
38  
39  
40  
41  
42  
43  
44  
45  
46  
47  
48  
49  
50  
51  
52  
53  
54  
55  
56  
57  
58  
59  
60

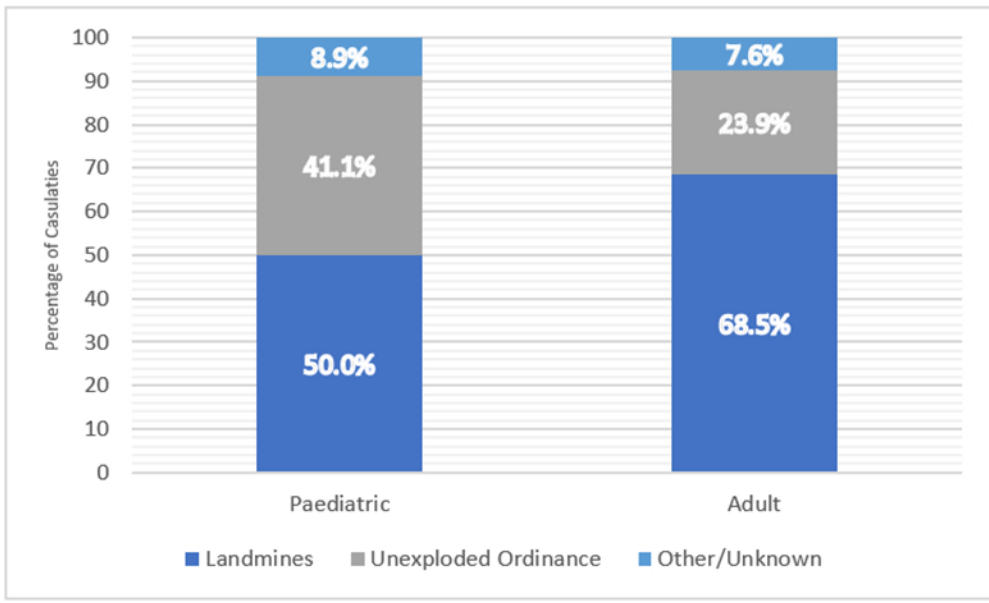

# BMJ Paediatrics Open

## **Blast Injuries in Children: a mixed-methods narrative review.**

|                               |                                                                                                                                                                                                                                                          |
|-------------------------------|----------------------------------------------------------------------------------------------------------------------------------------------------------------------------------------------------------------------------------------------------------|
| Journal:                      | <i>BMJ Paediatrics Open</i>                                                                                                                                                                                                                              |
| Manuscript ID                 | bmjpo-2019-000452.R3                                                                                                                                                                                                                                     |
| Article Type:                 | Review                                                                                                                                                                                                                                                   |
| Date Submitted by the Author: | 06-Jul-2019                                                                                                                                                                                                                                              |
| Complete List of Authors:     | Milwood Hargrave, John; Bioengineering<br>Pearce, Phillip; Dept of Bioengineering<br>Mayhew, Emily; Imperial College London, Bioengineering<br>Bull, Anthony; Dept of Bioengineering<br>Taylor, Sebastian; Royal College of Paediatrics and Child Health |
| Keywords:                     | Paediatric Practice, Paediatric Surgery, Accident & Emergency, General Paediatrics                                                                                                                                                                       |
|                               |                                                                                                                                                                                                                                                          |

SCHOLARONE™  
Manuscripts

1  
2  
3 Title:

4  
5 ***Blast injuries in children: a mixed-methods narrative review***  
6  
7

8 Authors:

9  
10 J.F.S. Millwood Hargrave, A.P. Pearce, E.R. Mayhew, S. Taylor, A.M.J. Bull  
11  
12

13  
14 Corresponding author:

15 Emily Mayhew

16 Dept. of Bioengineering, Imperial College London

17 Queensgate

18 London SW7 2AZ

19 Tel: 074949 63074

20 Email: e.mayhew@imperial.ac.uk  
21  
22

23  
24  
25  
26  
27  
28  
29 Authors:

30 John F.S. Millwood Hargrave,

31 South Thames Foundation School

32 Royal Army Medical Corps

33 208 Field Hospital, London, UK  
34  
35

36  
37  
38  
39  
40  
41 A.Phillip Pearce,

42 Centre for Blast Injury Studies

43 Imperial College London

44 Queensgate

45 London SW7 2AZ  
46  
47

48  
49  
50  
51  
52  
53 Emily R. Mayhew,

54 Dept of Bioengineering

55 Imperial College London  
56  
57  
58  
59  
60



1  
2  
3 Anthony M.J. Bull,  
4  
5 Dept of Bioengineering  
6  
7 Imperial College London  
8  
9 Queensgate  
10  
11 London SW7 2AZ  
12  
13

14 Sebastian Taylor  
15  
16 Royal College of Paediatrics and Child Health  
17  
18 5-11 St Theobald's Road  
19  
20 London WC1X 8SH  
21  
22

23  
24  
25  
26 Keywords: Paediatric, blast, trauma, conflict, outcomes  
27  
28

29  
30 Wordcount: 5,336.  
31  
32

33  
34  
35  
36  
37  
38  
39 **Patient and public involvement statement:**

40  
41  
42 **No patients or members of the public were involved in this review.**  
43  
44  
45  
46  
47  
48  
49  
50  
51  
52  
53  
54  
55  
56  
57  
58  
59  
60

## Key questions

### What is already known on this topic?

- Approximately one in six children live in conflict zones, where exposure to blast injuries is not uncommon. Blast injuries have the potential to inflict significant mortality and morbidity upon the global paediatric population living in conflict zones.
- Describing the characteristics of injuries sustained by the paediatric population is essential in advancing local and global health policies. Despite this, common themes related to paediatric injury following to blasts are poorly described.

### What this study adds?

- Paediatric victims are most likely to be male, with victims following conflict and explosive remnants of war (ERW) typically 4-10 years old. Of these victims, agricultural occupation and poor educational status is related to level of exposure.
- Head injuries are the leading cause of death in 46-71% of paediatric victims, and strongly associated with facial and ocular injuries conferring significant social and economic implications to the victims.
- Injuries to the extremities are seen in approximately half of children exposed to blast trauma, with upper limb injuries requiring between 1.5 to 3 times more operative intervention compared to adults. Functional repercussions of these injuries are significant, with 15% of traumatic amputations in the lower limb frequently requiring operative and prosthetic re-revision.
- An influx of paediatric patients can rapidly overwhelm health facilities, with between 47-82% of children requiring surgical intervention, of which 25% required over 4 procedures. Greater requirement for intensive care support in addition to prolonged inpatient and rehabilitative stays contributes to considerable service strain.

## Abstract

**Background and significance.** Blast injuries arising from high explosive weaponry is common in conflict areas. While blast injury characteristics are well recognised in the adults, there is a lack of consensus as to whether these characteristics translate to the paediatric population. Understanding blast injury patterns in this cohort is essential for providing appropriate provision of services and care for this vulnerable cohort.

**Methods.** In this mixed-method review, original papers were screened for data pertaining to paediatric injuries following blasts. Information on demographics, morbidity and mortality and service requirements were evaluated. The papers were written and published in English

1  
2  
3 from a range of international specialists in the field. Patient and public involvement  
4 statement: No patients or members of the public were involved in this review.  
5  
6

7 **Results.** Children affected by blast injuries are predominantly male and their injuries arise  
8 from explosive remnants of war, particularly unexploded ordnance. Blasts show increased  
9 morbidity and mortality in younger children, while older children have injury patterns similar  
10 to adults. Head and burn injuries represent a significant cause of mortality in young children,  
11 while lower limb morbidity is reduced compared to adults. Children have a disproportionate  
12 requirement for both operative and non-operative service resources, and provisions for this  
13 burden are essential.  
14  
15  
16  
17  
18

19 **Conclusions.** Certain characteristics of paediatric injuries arising from blasts are distinct  
20 from that of the adult cohort, while the intensive demands on services highlights the  
21 importance of understanding the diverse injury patterns in order to optimise future service  
22 provisions in caring for this the child blast survivor..  
23  
24  
25  
26  
27  
28  
29  
30  
31  
32  
33  
34  
35  
36  
37  
38  
39  
40  
41  
42  
43  
44  
45  
46  
47  
48  
49  
50  
51  
52  
53  
54  
55  
56  
57  
58  
59  
60

## Introduction

Approximately one in six children live in conflict zones, with the main global burden borne by citizens of low and middle income countries (LMICs)(1). Children enmeshed in conflict and post-conflict zones are frequently exposed to high-order explosives (HE), either through explosive remnants of war (ERW) such as landmines and unexploded ordinance (UXOs), military ordinance such as shelling and aerial bombardments or acts perpetrated by non-state actors such as improvised explosive devices (IEDs) and suicide bombing(2). HE can inflict unique and unusual injuries upon the child through the blast over-pressure wave (primary blast injury), energisation of materials causing fragmentation (secondary blast injury), bodily displacement or crush injuries (tertiary blast injuries) and through burns, inhalation, toxic or psychological trauma (quaternary blast injuries)(3).

The UN Convention on the Rights of the Child (UNCRC) seeks to secure both the safety and well-being of all the world's children. The long-term consequences of conflict injury constitutes grave violations of numerous articles, including Article 3 which calls for signatories to recognise the best interest of the child "in all decisions and actions that affect children." Similarly, Article 6 recognises every child's right to life and development, and Article 28 seeks to ensure their right to education. Article 23 specifies that children with a disability "have the right to live full and decent lives," and Article 39 states that children...who are victims of war must receive special support to help them recover...". Blast injury and its immediate effects are covered by Article 3.3 which states that medical care of the child be delivered and supervised by providers competent in that field(4). However, paediatric care in conflict zones is often delivered by personnel for whom experience of dealing with paediatric blast injuries is unusual(5). Primary studies increasingly recognise the complex patterns of injury sustained in the adult population following blast exposure(3), however there is a lack of consensus as to whether applying lessons learnt from the adult population translates appropriately into paediatric cohorts(6). Bree et al(7) argue that principles for life-saving interventions, such as prioritising catastrophic haemorrhage, airway, breathing and circulation are just as applicable in children as adults. Conversely Fendya et al(8) contend that directly applying adult trauma principles to the paediatric population neglects the social, anatomical, physiological and psychological differences between adults and children, affecting the validity of these inferences.

While primary studies have described injuries sustained by the blast injured child, no study has attempted to synthesise the data to identify recurrent characterises in this vulnerable cohort. Understanding the characteristics of such injuries to the paediatric population will advance efforts to prevent, mitigate, and treat these injuries in domestic and deployed health

1  
2  
3 systems(3). The aim of this review is to provide an overview of injury patterns and  
4 challenges in caring for the blast-injured child, in order to define future research needs for  
5 protection, mitigation, immediate medical treatment, and rehabilitation.  
6  
7

## 8 9 **Methods**

10  
11  
12 In this mixed-methods review, original peer-reviewed quantitative, qualitative and mixed-  
13 method observational studies, in addition to grey literature, were screened for data on  
14 explosive injuries in paediatric cohorts. By utilising all study designs, greater capture of  
15 relevant literature was achieved, although this meant the data was unsuitable for a formal  
16 systematic review. PubMed and Scopus (including Embase) were searched. Search terms  
17 including “Paediatric” OR “Pediatric” OR “Child\*” OR “Children” AND “Blast” OR “Explosi\*”  
18 OR “Explosion” were used to capture potential studies. Articles had to be written in English  
19 and published before December 16, 2018. Studies involving adult as well as children were  
20 included, in addition to articles where the mechanism of injury was mixed. This decision was  
21 taken in order to accurately reflect the settings the studies represent, where victims in  
22 conflict zones are heterogenous and subject to a variety of combat related mechanisms.  
23 Studies were omitted if they did not specify explosive mechanisms or include children.  
24  
25

26  
27  
28 Children are defined as all humans under the age of eighteen years (as specified by the  
29 United Nations Convention on the Rights of the Child)(4). The heterogeneity and arbitrary  
30 nature of what defines a child is acknowledged, and studies often utilise individual  
31 definitions. Within this review ages are defined thus: <1 year are infants, 1-8 are young  
32 children; 9-13 are older children and 14-18 are adolescents.  
33  
34

### 35 36 **Patient and public involvement statement:**

37  
38  
39 No patients or members of the public were involved in this review.  
40  
41  
42  
43  
44  
45  
46  
47  
48  
49  
50  
51  
52  
53  
54  
55  
56  
57  
58  
59  
60

## Results

Figure 1: Study selection

Study selection of the 74 studies included in this review are shown in figure 1. Of these, 26 utilise trauma registries (table 1), 26 single centre hospital based case series (table 2), 8 use multi-centre hospital based case series (table 3), 13 use community surveillance (table 4) while 1 uses grey literature (table 5).

Table 1. The 26 studies utilising trauma registries

|                                   | Monitoring period | Location            | Setting  | Sample Size | Population                      | Exposure                                                                    | Study                                   | Effect investigated    |
|-----------------------------------|-------------------|---------------------|----------|-------------|---------------------------------|-----------------------------------------------------------------------------|-----------------------------------------|------------------------|
| Aharonson-Daniel et al (2003)(9)  | 2000-2001         | Israel              | Civilian | 138         | Paediatric (100%)               | IEDs/Suicide IEDs (67%)<br>GSW (25%)<br>Other (8%)                          | Retrospective. National Trauma Registry | Injuries and mortality |
| Aharonson-Daniel et al (2006)(10) | 2000-2004         | Israel              | Civilian | 115         | Paediatric (8%)<br>Adult (92%)  | Suicide IEDs (100%)                                                         | Retrospective. National Trauma Registry | Injuries and mortality |
| Amir et al (2005)(11)             | 2000-2002         | Israel              | Civilian | 148         | Paediatric (100%)               | IEDs/Shelling (66%)<br>GSW (34%)                                            | Retrospective. National Trauma Registry | Injuries and mortality |
| Bilukha et al (2015)(12)          | 2010-2013         | Iraq                | Civilian | 2803        | Paediatric (13%)<br>Adult (87%) | IEDs (49%)<br>Other/Unknown (51%)                                           | Retrospective. Military Trauma Registry | Injuries and mortality |
| Bitterman et al (2016)(13)        | 2013              | Israel              | Military | 84          | Paediatric (100%)               | IEDs/Shelling (67%)<br>GSW (23%)<br>Non-Combat (10%)                        | Retrospective. Military Trauma Registry | Injuries and mortality |
| Borgman et al (2012)(14)          | 2001-2011         | Afghanistan<br>Iraq | Military | 128582      | Paediatric (6%)<br>Adult (94%)  | Non-Combat (40%)<br>IEDs/Shelling (38%)<br>GSW (22%)                        | Retrospective. Military Trauma Registry | Injuries and mortality |
| Borgman et al (2015)(15)          | 2003-2011         | Afghanistan<br>Iraq | Military | 549         | Paediatric (100%)               | Non-Combat (84%)<br>IEDs/Shelling (11%)<br>Other/Unknown (5%)               | Retrospective. Military Trauma Registry | Injuries and mortality |
| Creamer et al (2009)(16)          | 2004-2007         | Afghanistan<br>Iraq | Military | 2090        | Paediatric (100%)               | GSW (29%)<br>IEDs/Shelling (24%)<br>Other/Unknown (22%)<br>Non-combat (25%) | Retrospective. Military Trauma Registry | Injuries and mortality |
| Dua et al (2013)(17)              | 2006-2008         | Iraq                | Military | 25          | Paediatric (100%)               | IEDs/Shelling (72%)<br>GSW (28%)                                            | Retrospective. Military Trauma Registry | Injuries and mortality |
| Edwards et al (2012)(18)          | 2002-2012         | Afghanistan<br>Iraq | Military | 4913        | Paediatric (100%)               | IEDs/Shelling (100%)                                                        | Retrospective. Military Trauma Registry | Injuries and mortality |
| Edwards et al (2014)(19)          | 2002-2012         | Afghanistan<br>Iraq | Military | 6273        | Paediatric (100%)               | IEDs/Shelling (23%)<br>GSW (16%)<br>Other/Unknown (4%)<br>Non-Combat (57%)  | Retrospective. Military Trauma Registry | Injuries and mortality |
| Edwards et al                     | 2002-2010         | Afghanistan         | Military | 4928        | Paediatric (100%)               | IEDs/Shelling (100%)                                                        | Retrospective.                          | Injuries and           |

|                             |           |                     |          |      |                                 |                                                                                   |                                            |                        |
|-----------------------------|-----------|---------------------|----------|------|---------------------------------|-----------------------------------------------------------------------------------|--------------------------------------------|------------------------|
| (2014)(20)                  |           | Iraq                |          |      |                                 |                                                                                   | Military Trauma Registry                   | mortality              |
| Hillman et al (2016)(21)    | 2003-2014 | Afghanistan<br>Iraq | Military | 27   | Paediatric (100%)               | IEDs /Shelling (59%)<br>GSW (26%)<br>Non-combat (15%)                             | Retrospective.<br>Military Trauma Registry | Injuries and mortality |
| Jaffe et al (2010)(22)      | 2000-2005 | Israel              | Civilian | 837  | Paediatric (14%)<br>Adult (86%) | IEDs (100%)                                                                       | Retrospective.<br>National Trauma Registry | Injuries and mortality |
| Khan et al (2015)(23)       | 2010-2011 | Pakistan            | Civilian | 103  | Paediatric (16%)<br>Adult (84%) | IEDs (100%)                                                                       | Retrospective National Trauma Registry     | Injuries and mortality |
| Kluger et al (2004)(24)     | 2000-2003 | Israel              | Civilian | 906  | Paediatric (7%)<br>Adult (93%)  | IEDs (100%)                                                                       | Retrospective.<br>National Trauma Registry | Injuries and mortality |
| McKechnie et al (2014)(25)  | 2008-2012 | Afghanistan         | Military | 766  | Paediatric (100%)               | IEDs/Shelling (51%)<br>GSW (28%)<br>Non-combat (21%)                              | Retrospective.<br>Military Trauma Registry | Injuries and mortality |
| Naylor et al (2018)(26)     | 2007-2016 | Afghanistan<br>Iraq | Military | 3439 | Paediatric (100%)               | IEDs/Shelling (38%)<br>GSW (20%)<br>Non-combat (11%)<br>Other/Not specified (31%) | Retrospective.<br>Military Trauma Registry | Injuries and mortality |
| Neff et al (2014)(27)       | 2001-2013 | Afghanistan<br>Iraq | Military | 1113 | Paediatric (100%)               | IEDs/Shelling (56%)<br>GSW (32%)<br>Non-combat (12%)                              | Retrospective.<br>Military Trauma Registry | Injuries and mortality |
| Patregnani et al (2012)(28) | 2002-2009 | Afghanistan<br>Iraq | Military | 744  | Paediatric (100%)               | IEDs/Shelling (43%)<br>GSW (26%)<br>Non-combat (31%)                              | Retrospective.<br>Military Trauma Registry | Injuries and mortality |
| Quintana et al (1997)(29)   | 1996      | USA                 | Civilian | 66   | Paediatric (100%)               | IED (100%)                                                                        | Retrospective.<br>National Trauma Registry | Injuries and mortality |
| Schauer et al (2018)(30)    | 2007-2016 | Afghanistan<br>Iraq | Military | 3388 | Paediatric (100%)               | IEDs/Shelling (43%)<br>GSW (22%)<br>Non-combat (35%)                              | Retrospective.<br>Military Trauma Registry | Injuries and mortality |
| Smith et al (2014)(31)      | 2003-2011 | Afghanistan<br>Iraq | Military | 813  | Paediatric (6%)<br>Adult (94%)  | IEDs/Shelling (77%)<br>GSW (23%)                                                  | Retrospective.<br>Military Trauma Registry | Injuries and mortality |
| Villamaria et al (2014)(32) | 2002-2011 | Afghanistan<br>Iraq | Military | 155  | Paediatric (100%)               | IEDs/Shelling (58%)<br>GSW (37%)<br>Other/Not specified (5%)                      | Retrospective.<br>Military Trauma Registry | Injuries and mortality |
| Waisman et al (2003)(33)    | 2000-2002 | Israel              | Civilian | 160  | Paediatric (100%)               | IEDs (67%)<br>GSW (25%)<br>Other/Not specified (11%)                              | Retrospective.<br>National Trauma Registry | Injuries and mortality |
| Woods et al (2012)(34)      | 2003-2009 | Afghanistan<br>Iraq | Military | 176  | Paediatric (100%)               | IEDs/Shelling (59%)<br>GSW (21%)<br>Non-combat (20%)                              | Retrospective.<br>Military Trauma Registry | Injuries and mortality |

Table 2. The 26 studies utilising single centre hospital based case series

|                             | Monitoring period | Location | Setting  | Sample Size | Population                      | Exposure         | Study                                                      | Effect investigated |
|-----------------------------|-------------------|----------|----------|-------------|---------------------------------|------------------|------------------------------------------------------------|---------------------|
| Al-Worikat et al (2001)(35) | 1988-2000         | Jordan   | Civilian | 226         | Paediatric (10%)<br>Adult (90%) | Landmines (100%) | Retrospective.<br>Single centre Hospital based case series | Long term sequelae  |

|                              |           |             |          |      |                                 |                                                                                  |                                                         |                        |
|------------------------------|-----------|-------------|----------|------|---------------------------------|----------------------------------------------------------------------------------|---------------------------------------------------------|------------------------|
| Arul et al (2012)(36)        | 2011      | Afghanistan | Military | 82   | Paediatric (100%)               | IEDs/Shelling (52%)<br>GSW (11%)<br>Non-combat (37%)                             | Retrospective. Single centre Hospital based case series | Injuries and mortality |
| Bajec et al (1993)(37)       | 1991      | Kuwait      | Civilian | 152  | Paediatric (12%)<br>Adult (88%) | Landmines (100%)                                                                 | Retrospective. Single centre Hospital based case series | Injuries and mortality |
| Beitler et al (2006)(38)     | 2002      | Afghanistan | Military | 204  | Paediatric (28%)<br>Adult (72%) | Non-combat (44%)<br>IEDs/Shelling (36%)<br>GSW (20%)                             | Retrospective. Single centre Hospital based case series | Injuries and mortality |
| Bertani et al (2015)(39)     | 2009-2013 | Afghanistan | Military | 89   | Paediatric (100%)               | IEDs/Shelling (79%)<br>GSW (21%)                                                 | Retrospective. Single centre Hospital based case series | Injuries and mortality |
| Coppola et al (2006)(40)     | 2004-2005 | Iraq        | Military | 85   | Paediatric (100%)               | IEDs/Shelling (29%)<br>Non-combat (44%)<br>Other/Unknown (27%)                   | Retrospective. Single centre Hospital based case series | Injuries and Mortality |
| Can et al (2009)(41)         | 2001-2008 | Turkey      | Civilian | 23   | Paediatric (100%)               | Landmines (87%)<br>UXO (13%)                                                     | Retrospective. Single centre Hospital based case series | Injuries and mortality |
| Chehab et al (2018)(42)      | 2009-2012 | Afghanistan | Military | 81   | Paediatric (100%)               | IEDs/Shelling (67%)<br>GSW (21%)<br>Stabbing (12%)                               | Retrospective. Single-centre Hospital based case series | Injuries and mortality |
| Er et al (2017)(43)          | 2013-2014 | Syria       | Civilian | 1591 | Paediatric (18%)<br>Adult (82%) | IEDs/Shelling (77%)<br>GSW (7%)<br>Other/Unknown (16%)                           | Retrospective. Single-centre Hospital based case series | Injuries and Mortality |
| Fares et al (2013)(44)       | 2006-2011 | Lebanon     | Civilian | 122  | Paediatric (100%)               | UXO (100%)                                                                       | Retrospective. Single centre Hospital based case series | Long term sequelae     |
| Fares et al (2014)(45)       | 2006-2013 | Lebanon     | Civilian | 29   | Paediatric (28%)<br>Adult (72%) | UXO (100%)                                                                       | Retrospective. Single centre Hospital based case series | Injuries and mortality |
| Gurney et al (2004)(46)      | 2003      | Iraq        | Military | 78   | Paediatric (100%)               | IEDs/Shelling (7%)<br>GSW (1%)<br>Other/Not specified (9%)<br>Non-Conflict (83%) | Retrospective. Single-centre Hospital based case series | Injuries and mortality |
| Harris et al (2009)(5)       | 2008      | Afghanistan | Military | 15   | Paediatric (100%)               | IEDs/Shelling (87%)<br>Other/Not specified (6%)<br>Non-conflict (7%)             | Retrospective. Single-centre Hospital based case series | Injuries and mortality |
| Hinsley et al (2005)(47)     | 2003      | Iraq        | Military | 79   | Paediatric (10%)<br>Adult (90%) | IEDs/Shelling (63%)<br>GSW (37%)                                                 | Retrospective Single-centre Hospital based case series  | Injuries and mortality |
| Hodalic et al (1999)(48)     | 1991-1992 | Croatia     | Military | 1211 | Paediatric (13%)<br>Adult (87%) | IEDs/Shelling (95%)<br>GSW (3%)<br>Other/Not specified (2%)                      | Retrospective. Single-centre Hospital based case series | Injuries and mortality |
| Inwald et al (2014)(49)      | 2011-2012 | Afghanistan | Military | 112  | Paediatric (100%)               | IEDs/Shelling (54%)<br>GSW (29%)<br>Non-conflict (17%)                           | Retrospective Single-centre Hospital based case series  | Injuries and mortality |
| Jeevaratnam et al (2013)(50) | 2010      | Afghanistan | Military | 88   | Paediatric (35%)<br>Adult (65%) | IEDs/Shelling (33%)<br>Non-conflict (67%)                                        | Retrospective Single-centre Hospital based case series  | Injuries and mortality |
| Klumo et al (2010)(51)       | 2007-2009 | Afghanistan | Military | 43   | Paediatric (100%)               | IEDs/Shelling (67%)<br>GSW (5%)<br>Non-combat (28%)                              | Retrospective. Single-centre Hospital based case series | Injuries and mortality |



|                           |           |                |          |      |                                |                                                               |                                                         |                        |
|---------------------------|-----------|----------------|----------|------|--------------------------------|---------------------------------------------------------------|---------------------------------------------------------|------------------------|
| Matos et al (2008)(52)    | 2003-2004 | Iraq           | Military | 1132 | Paediatric (3%)<br>Adult (97%) | IEDs/Shelling (64%)<br>Non-combat (36%)                       | Retrospective. Single-centre Hospital based case series | Injuries and mortality |
| McGuigan et al (2007)(53) | 2004      | Iraq           | Military | 99   | Paediatric (100%)              | GSW (42%)<br>IEDs/Shelling (35%)<br>Other/Not specified (23%) | Retrospective. Single-centre Hospital based case series | Injuries and mortality |
| Nordmann et al (2010)(54) | 2008-2009 | Afghanistan    | Military | 31   | Paediatric (100%)              | IEDs/Shelling (45%)<br>GSW (32%)<br>Non-combat (23%)          | Retrospective. Single-centre Hospital based case series | Injuries and mortality |
| Pannell et al (2015)(55)  | 2010-2011 | Afghanistan    | Military | 263  | Paediatric (100%)              | IEDs/Shelling (42%)<br>GSW (17%)<br>Non-combat (41%)          | Retrospective. Single-centre Hospital based case series | Injuries and mortality |
| Pearce et al (2015)(56)   | 2011-2012 | Afghanistan    | Military | 281  | Paediatric (100%)              | IEDs/Shelling (47%)<br>GSW (13%)<br>Non-combat (35%)          | Retrospective. Single-centre Hospital based case series | Injuries and mortality |
| Terzic et al (2001)(57)   | 1991-1995 | Bosnia Croatia | Civilian | 92   | Paediatric (100%)              | IEDs/Shelling/UXO (100%)                                      | Retrospective. Single-centre Hospital based case series | Injuries and mortality |
| Thompson et al (2017)(58) | 2006-2013 | Afghanistan    | Military | 295  | Paediatric (100%)              | IED (68%)<br>UXO (4%)<br>Other/Not specified (28%)            | Retrospective. Single-centre Hospital based case series | Injuries and mortality |
| Walker et al (2010)(59)   | 2006-2007 | Afghanistan    | Military | 78   | Paediatric (100%)              | IEDs/Shelling (64%)<br>GSW (37%)<br>Other/Not specified (5%)  | Retrospective. Single-centre Hospital based case series | Injuries and mortality |
| Wilson et al (2013)(60)   | 2010-2011 | Afghanistan    | Military | 41   | Paediatric (100%)              | IEDs/Shelling (47%)<br>GSW (12%)<br>Non-combat (42%)          | Retrospective. Single-centre Hospital based case series | Injuries and mortality |

Table 3. The 8 studies utilising multi-centre hospital based case series

|                             | Monitoring period | Location | Setting  | Sample Size | Population                      | Exposure                                                | Study                                                           | Effect investigated    |
|-----------------------------|-------------------|----------|----------|-------------|---------------------------------|---------------------------------------------------------|-----------------------------------------------------------------|------------------------|
| Arafat et al (2017)(61)     | 2012-2013         | Syria    | Civilian | 324         | Paediatric (18%)<br>Adult (82%) | IEDs/Shelling (57%)<br>GSW (43%)                        | Retrospective. Multi-centre Hospital based case series          | Injuries and mortality |
| Bendinelli et al (2009)(62) | 2003-2006         | Cambodia | Civilian | 356         | Paediatric (26%)<br>Adult (74%) | Landmines (67%)<br>UXO (33%)                            | Retrospective. Multi-centre Hospital based case series          | Injuries and mortality |
| Celikel et al (2014)(63)    | 2012              | Syria    | Civilian | 186         | Paediatric (22%)<br>Adult (78%) | IEDs/Shelling (67%)<br>GSW (26%)<br>Other/Unknown (7%)  | Retrospective. Multi-centre Hospital based mortuary case series | Mortality              |
| Celikel et al (2015)(64)    | 2012-2014         | Syria    | Civilian | 140         | Paediatric (100%)               | IEDs/Shelling (70%)<br>GSW (14%)<br>Other/Unknown (16%) | Retrospective. Multi-centre Hospital based mortuary case series | Mortality              |
| Gataa et al (2011)(65)      | 2005-2006         | Iraq     | Civilian | 551         | Paediatric (20%)<br>Adult (80%) | IEDs (82%)<br>GSW (18%)                                 | Retrospective. Multi-centre Hospital based case series          | Injuries and mortality |
| Hanevik et al (2000)(66)    | 1991-1995         | Eritrea  | Civilian | 248         | Paediatric (63%)<br>Adult (37%) | Landmines (100%)                                        | Retrospective. Multi-centre Hospital based case series          | Injuries and mortality |

|                         |           |                     |          |      |                                |                             |                                                                |                        |
|-------------------------|-----------|---------------------|----------|------|--------------------------------|-----------------------------|----------------------------------------------------------------|------------------------|
| Mirza et al (2013)(67)  | 2007-2011 | Pakistan            | Civilian | 1142 | Paediatric (6%)<br>Adult (94%) | IEDs (100%)                 | Retrospective Multi-centre Hospital based mortuary case series | Injuries and mortality |
| Spinella et al 2008(68) | 2001-2007 | Afghanistan<br>Iraq | Military | 1305 | Paediatric (100%)              | Trauma (Unspecified) (100%) | Retrospective. Multi-centre Hospital based case series         | Injuries and mortality |

Table 4. The 13 studies utilising community surveillance

|                                    | Monitoring period | Location                                        | Setting  | Sample Size | Population                      | Exposure                                                    | Study                                              | Effect investigated                        |
|------------------------------------|-------------------|-------------------------------------------------|----------|-------------|---------------------------------|-------------------------------------------------------------|----------------------------------------------------|--------------------------------------------|
| Andersson et al (1995)(69)         | 1994-1995         | Afghanistan<br>Bosnia<br>Cambodia<br>Mozambique | Civilian | 2100        | Paediatric (100%)               | Landmines (100%)                                            | Retrospective. community surveillance              | Socio-economic                             |
| Bilukha et al (2003)(70)           | 2001-2002         | Afghanistan                                     | Civilian | 1636        | Paediatric (46%)<br>Adult (54%) | UXO (47%) Landmine (41%)<br>Other/Unknown (12%)             | Retrospective. Community Surveillance              | Injuries and mortality                     |
| Bilukha et al (2007)(71)           | 1994-2005         | Chechnya                                        | Civilian | 3021        | Paediatric (30%)<br>Adult (70%) | Landmines (41%)<br>UXO (37%)<br>Other/Unknown (22%)         | Retrospective. Community Surveillance              | Injuries and mortality                     |
| Bilukha et al (2008)(72)           | 2002-2006         | Afghanistan                                     | Civilian | 5471        | Paediatric (54%)<br>Adult (46%) | UXO (50%)<br>Landmines (42%)<br>Other/Unknown (8%)          | Retrospective. Community Surveillance              | Injuries and mortality                     |
| Bilukha et al (2011)(73)           | 2006-2010         | Nepal                                           | Civilian | 307         | Paediatric (58%)<br>Adult (42%) | IEDs (76%)<br>Landmines (4%)<br>Other/Unknown (20%)         | Retrospective. Community Surveillance              | Injuries and mortality                     |
| Bilukha et al (2013)(74)           | 2008-2011         | Nepal                                           | Civilian | 437         | Paediatric (14%)<br>Adult (76%) | IEDs (69%)<br>Other/Unknown (31%)                           | Retrospective. Community Surveillance              | Injuries and mortality                     |
| Guerriero et al (2014)(75)         | 2013              | USA                                             | Civilian | 11          | Paediatric (100%)               | IEDs (100%)                                                 | Prospective. Community Surveillance                | Long term sequelae                         |
| Guha-Sapir et al (2018)(76)        | 2011-2016         | Syria                                           | Civilian | 101453      | Paediatric (17%)<br>Adult (83%) | Shelling/Air bombardment (57%)<br>Other/Not specified (43%) | Retrospective. Community Surveillance              | Mortality                                  |
| Hemmati et al (2015)(77)           | 1988-2013         | Iran                                            | Civilian | 78          | Paediatric (100%)               | Landmines (100%)                                            | Cross-section. Community surveillance              | Long term sequelae                         |
| Kinra et al (2003)(78)             | 1991-2000         | Bosnia and Herzegovina                          | Civilian | 4064        | Paediatric (14%)<br>Adult (86%) | Landmines (100%)                                            | Retrospective. Community Surveillance              | Injuries and mortality                     |
| Mousavi et al (2015)(79)           | 2014              | Iran                                            | Civilian | 78          | Paediatric (100%)               | Landmines (80%)<br>UXO (20%)                                | Retrospective. Mixed-method community surveillance | Long-term sequelae/ Injuries and mortality |
| Pat-Horenczyk et al (2007)(80)     | 2006              | Israel                                          | Civilian | 695         | Paediatric (100%)               | IEDs (100%)                                                 | Retrospective. Mixed-method community surveillance | Long term sequelae                         |
| Poor Zamany Nejat et al (2016)(81) | 2015              | Iran                                            | Civilian | 41          | Paediatric (100%)               | Landmines (100%)                                            | Retrospective mixed-method community surveillance  | Long term sequelae                         |

Table 5. The 1 study utilising grey literature

|                             | Monitoring period | Location | Setting  | Sample Size | Population                      | Exposure                         | Study           | Effect investigated |
|-----------------------------|-------------------|----------|----------|-------------|---------------------------------|----------------------------------|-----------------|---------------------|
| Guha-Sapir et al (2015)(82) | 2011-2014         | Syria    | Civilian | 78769       | Paediatric (16%)<br>Adult (84%) | IEDs/Shelling (75%)<br>GSW (25%) | Grey-literature | Mortality           |

## Demographics

1  
2  
3 Following the use of explosive weaponry by non-state actors against civilians, the most  
4 commonly injured paediatric cohort are males aged 10-18 years old(9,11,33), while children  
5 involved in conflict and ERW blast injuries were generally aged between 4-10 years  
6 old(18,59). Perpetrators target busy areas such as restaurants and nightclubs which older  
7 children and adolescents might frequent (10,11,33), while cultural factors within LMICs in  
8 these social areas result in a predominantly male cohort (9,10,12,22–24,33,67,75,80).  
9 Similar gender finding are observed in children following conflict and ERW related injuries  
10 where all studies showed male predominance in victims, with over 70% male in three  
11 quarters of the studies (Figure 2).  
12  
13  
14  
15  
16  
17  
18  
19

20 Figure 2. Gender differences in in casualties following blast  
21

22 ERW contribute considerable morbidity and mortality both during and following conflict. As  
23 seen in figure 3, children were more likely to be injured by UXO compared with adults, while  
24 landmines affected a predominately adult cohort (35,37,41,62,69,70,72,73,78). It should be  
25 noted that statistics on pre-hospital mortality for children in conflict settings is generally an  
26 underestimation due to the difficulties in reporting and monitoring. It should be noted overall  
27 that there is limited statistical information available currently to researchers wherever they  
28 work with blast injured children and that thus the percentages used in some of the papers  
29 they considered were unable to be supported with the full range of statistical confirmation. It  
30 is hoped that this review will provide focus for those organisations that seek to provide  
31 statistics on child conflict injuries, for instance many explosive weapons observation groups  
32 do not or who are unable to distinguish between adults and children in their reporting.  
33  
34  
35  
36  
37  
38  
39  
40  
41  
42

43 Figure 3. Percentage of Casualties (injuries and fatalities) by specific modalities  
44

45 UXOs have been described as small, colourful and toy-like, promoting child interaction and  
46 subsequent injury from handling, resulting in often fatal upper limb, head, neck or chest  
47 injury(41,44,62,83,84). Due to the social nature of children, these interactions commonly  
48 occur in groups, leading to multiple casualties in 45-63% of events involving children  
49 compared to 30-40% in adults(70,78,79).  
50  
51  
52  
53

54 Occupation and education play a role in ERW injuries. It is common for children in LMICs,  
55 particularly males, to assist their family with herding and farming as opposed to attending  
56 school. This may affect the likelihood to exposure to ERWs through increased freedom to  
57 roam where such devices are present(25,42,64,72). A lack of formal education impacts the  
58  
59  
60

1  
2  
3 child's ability to read warning signs; only 6-22% of victims were aware ERWs were  
4 present(27,80) and of these, only 0-11% had received ERW risk education(23,25,27,80).  
5  
6

7 Children are particularly vulnerable to wide-area explosives such as aerial bombardment and  
8 shelling, particularly in the primarily urbanised environments of modern conflicts. In the  
9 Syrian Civil War, three quarters of wide-area explosives were used in civilian residential  
10 areas that children frequent, with these mechanisms responsible for 82% of child  
11 deaths(76,82).  
12  
13  
14

15  
16 The following section reviews what is known of mortality in children before reviewing injury  
17 types.  
18  
19

## 20 21 **Mortality**

22  
23 Comparison of paediatric wartime mortality data is difficult as many studies do not  
24 differentiate mechanism of injury. Edwards et al(85) study on 4,913 children between 2002-  
25 2010 presenting with blast injuries remains the single largest data set. The reported mortality  
26 rate of 8% matches well with the mortality rates of 6-9% quoted in paediatric trauma deaths  
27 from Iraq and Afghanistan, although these studies displayed all trauma mechanisms as  
28 opposed to specifying blast trauma(14,16,20,25,36,40). Between 2006-2013, Thompson et  
29 al. (58) noted a mortality rate over double of that quoted by Edwards et al. following  
30 paediatric blast injury in Afghanistan (18%). Operational tempo and the increasing use of  
31 IEDs have been hypothesized to underlie these discrepancies in mortality(58).  
32  
33  
34  
35  
36  
37  
38

39 Age related variation in mortality has been described. Matos et al noted mortality was  
40 highest at 24% in young children (5-8 year old)(52) while Schauer et al and Spinella et al  
41 found greatest mortality in 0-4 years(30,68). Similarly, Borgman et al and Matos et al noted  
42 that children <8 years old had increased trauma mortality compared to 8-16 year olds (10-  
43 18% vs 4-7%)(15,52), while Spinella et al noted a similar increase in mortality in young  
44 children (<6 year old) compared to 6-16 year olds (11% vs 4%)(68). Few studies directly  
45 compare adult and paediatric mortality, and comparisons between studies are difficult due to  
46 methodological differences. What is common is that mortality in children following combat  
47 related trauma is considerably higher than that of paediatric non-combat trauma (2-3%)(86)  
48 and adult military combat casualties (1-3%)(87,88).  
49  
50  
51  
52  
53  
54

55 A wide range of paediatric mortality is reported following mine strikes, ranging from 4-  
56 46%(41,44,62,69-74,83). Shuker et al(89) suggested that approximately half of paediatric  
57 victims die within minutes of mine explosion, likely due to penetrating head injury, and  
58  
59  
60

1  
2  
3 catastrophic haemorrhage causing non-survivable injuries, in keeping with adult  
4 literature(87,88). Time critical injuries following blasts may represent particular problems in  
5 LMIC's, where pre-hospital evacuation chains may be protracted. Coupland(90) noted that in  
6 1991, only 14% of paediatric and adult ERW victims were admitted in under six hours, while  
7 the majority (58%) were admitted between 6-24 hours and 28% presented after 24 hours.  
8 Even in recent conflicts, Bitterman et al(13) found <10% of children presented within 1 hour,  
9 with over a third presenting after 6 hours. Protracted evacuation of paediatric victims add to  
10 blast mortality, reinforced by studies observing a 85-91% mortality of children either at scene  
11 or en-route to health facilities(73,89).

### 19 **Vascular injuries**

21 Penetrating injuries occur in 38-76% of blast-exposed children (9,10,14,16,33,36,37,55), with  
22 incidence greater in older children aged 10-16 compared to 0-10 year olds (65-83% vs 47-  
23 63%)(22,52). In keeping with penetrating injury patterns, vascular injury was observed in 3-  
24 12% of children following blast trauma (9,32,33,37), considerably higher compared to non-  
25 blast conflict trauma where vascular injury occurred in 0.6-1% of paediatric  
26 victims(9,10,24,32,53).

32 Vascular damage and subsequent haemorrhage following explosions have been identified  
33 as a significant cause of childhood fatalities, ranging from the primary cause of death in 21-  
34 38% during the Syrian Civil War(63,64) to 63% following IED and suicide attacks in  
35 Pakistan(67), while mortality rates following penetrating injuries in civilian settings are  
36 considerably lower (5%)(32). Extremity trauma was most highly associated with vascular  
37 injuries, with the majority of vascular injuries occurring in the lower limb (38-58%) followed  
38 by the upper limbs (25-28%)(17,32). This is in keeping with adult data where 54% of injuries  
39 were sustained to the extremities(87). Despite its high prevalence, extremity vascular  
40 wounds confer reduced risk of death compared to vascular damage within the torso,  
41 attributed as the primary cause of death in 71% of paediatric deaths and conferring a four-  
42 fold increased risk of death compared to extremity vascular injuries(32).

50 Data on vascular damage is clear: older children and adolescents sustain similar rates of  
51 vascular injury to adults, particularly to the extremities, while mortality following penetrating  
52 trauma is primarily the result of injuries to the vasculature within the torso.

### 56 **Head injuries**

1  
2  
3 The prevalence of head injuries following blasts are diverse, ranging from 6-54%  
4 (10,11,40,42,43,47-49,53,13,16,18,32,33,36,38,39), while adult combat data ranges from  
5 16-29%(87). This variation is due to the heterogenous definitions of head injury described in  
6 these studies, with few studies differentiating between superficial scalp wounds, blunt  
7 traumatic brain injury (TBI) or penetrating TBI. Where head injuries were documented, TBI  
8 was recorded in 21-62% of paediatric victims, of which 38-39% were defined as  
9 penetrating(33,45,48). Unsurprisingly, papers noted over double the incidence of paediatric  
10 penetrating head injury in blast trauma compared to mainly blunt civilian trauma (13% vs  
11 6%), while the reverse was true in closed head injuries, with half the incidence of closed  
12 head injuries in blast injuries compared to civilian trauma (22% vs 44%)(9).

13  
14  
15  
16  
17  
18  
19  
20 Cerebral haemorrhage and direct cranial damage following blast have been attributed as a  
21 leading cause of death in children, responsible for 46-71% of fatalities (36-38,43,101).  
22 Creamer(38) noted penetrating wounds to the head accounted for 44% of child deaths in the  
23 emergency department while open skull fractures with cerebral evisceration was  
24 documented in 88% of paediatric fatalities following the 1995 Oklahoma City bombings(102).  
25 While penetrating head injuries undoubtedly carry high mortality, Woods(34) noted that 8  
26 children survived to hospital discharge despite penetrating head injuries deemed initially  
27 unsurvivable, suggesting such are not unequivocally fatal.

28  
29  
30  
31  
32  
33 Er et al(43) noted that children were more likely to be injured in the head compared to adults  
34 (54% vs 40%) following aerial and shelling during the Syrian Civil War, while young children  
35 aged between 0-4 year old were more likely to undergo neurosurgical procedures compared  
36 to other ages(20,51), 48% of which were craniectomies or craniotomies for penetrating brain  
37 injury, mainly secondary to IED blasts(51). Suggested reasons for this increase may relate to  
38 anatomical predispositions, particularly in infants, such as large head to body ratios in  
39 addition to reduced skull rigidity(22) as well as the relatively shorter distance from the head  
40 to ground-based ERW and IEDs compared to adults(18,22,62,84,89).

41  
42  
43  
44  
45  
46  
47 There is a clear lack of studies investigating long term outcomes following blast- associated  
48 head injuries. While significant cognitive, intellectual and functional sequelae arising from  
49 non-blast TBI (nbTBI) have been described, controversy exists as to whether nbTBI is  
50 analogous to blast-induced TBI(91), and the paucity of paediatric data means this  
51 comparison is even more problematic.

52  
53  
54  
55  
56 A unifying message is that head injuries are associated with high morbidity and mortality in  
57 paediatric blast trauma, while the long term consequences remain largely unknown. Head  
58 injuries are commonly penetrating compared to civilian practice, and increased operative  
59  
60

1  
2  
3 demand in infants and toddlers for neurosurgical procedures may stretch medical service  
4 expertise.  
5

### 6 7 **Facial and ocular injuries** 8

9  
10 Blasts result in injury to the face in between 27-48% of paediatric victims, compared to 12%  
11 resulting from GSW(11,18,49) and 10% in adults(87). Relative to other blast related injuries,  
12 facial injuries in isolation are associated with reduced mortality(18). However, Gataa (65)  
13 noted that of the patients presenting with facial injuries, 29% had concomitant eye injury,  
14 22% had TBI, while life-threatening facial bleeding occurred in 10% of patients. In addition to  
15 physical sequelae, facial injuries are associated with functional and psychological disorders  
16 stemming from stigmatisation of disfiguring injuries with implications for future social,  
17 economic and marital prospects(65).  
18

19  
20 Despite only comprising of 0.3% of the anterior body surface, the eye is sensitive to blast  
21 injury, with ocular injuries in 4-28% of children following trauma related to combat or ERW  
22 (13,16,36,38,39,42,45,53,79). In keeping with patterns of facial injury, an increased  
23 prevalence of eye injury is associated with blast injuries compared to GSW (13% vs 3%)(11).  
24 Landmines are often associated with multiple foreign bodies on the conjunctiva, cornea and  
25 sclera, in addition to sight-threatening injuries such as enucleation or eye globe  
26 perforation(41). Monocular enucleation was observed in 4%, while bilateral enucleation, and  
27 hence blindness, was more common (14%)(41,79). When compared to adult victims of  
28 landmines and cluster bombs, children have more eye injuries (14% vs 8%)(78) as well as  
29 twice the prevalence of eye globe perforation (28% vs 14%)(43) and complete loss of vision  
30 (21 vs 10%)(62). Without adequate support, both monocular and bilateral vision loss may  
31 translate to developmental and educational deficiencies in the growing child.  
32

33  
34 Facial and eye injuries are frequent following exposure to blasts, and should raise suspicion  
35 of intracranial injury. Important are the social and education implications of these disfiguring  
36 injuries in the growing child.  
37

### 38 39 **Torso Injuries** 40

41  
42 Following blast injury, trauma to the torso is common, varying from 12-46% between studies  
43 (11,13,41,43,47-49,67,16-18,32,36,38-40) and peaking in 5-10 year olds(22,33). Er et al.'s  
44 (43) study on civilian paediatric injuries during the Syrian Civil War noted that the abdomen  
45 was less commonly injured compared to adults (12 vs 20%), while chest injury with  
46 accompanying lung contusion was present in 51% of children with torso injuries, compared  
47 to 35% in adults. Both chest and abdominal injuries from blast are typically classed as  
48  
49  
50  
51  
52  
53  
54  
55  
56  
57  
58  
59  
60

1  
2  
3 'severe'(18). Abdominal injuries accounted for 18-19% of injury specific deaths following  
4 blast in the paediatric population, while chest injuries have been attributed to 8% of deaths in  
5 the ED(16). Explanations for this susceptibility to severe and life threatening torso injuries  
6 include a lack of body armour compared to adult combat victims and the observation that  
7 children have flexible rib cages allowing greater damage to underlying structures without rib  
8 fracture, contributing to the increase in lung contusion observed(32).  
9  
10  
11  
12

13  
14 When organ specific injuries were examined, blast was most likely to cause open  
15 penetrating wounds of the bowel and intra-abdominal organs, affecting the small intestine in  
16 over a third (34%) and the liver, spleen or pancreas in 36%(16,54,61). Where internal organ  
17 damage was sustained, injury specific mortality almost doubled from 15 to 29%(63). These  
18 injuries were frequently contaminated due to bowel rupture, requiring multiple procedures  
19 and a high rate of antibiotic usage(57). The thinner abdominal walls, reduced intraabdominal  
20 fat and larger solid organs relative to the body cavity increases likelihood of visceral damage  
21 following penetrating trauma, while delayed signs of visceral damage support the role of  
22 repeated examination and radiological input, even in the absence of external damage.  
23  
24  
25  
26  
27  
28

29 In the context of total operative procedures performed, laparotomies comprised a significant  
30 component of total surgical workload, encompassing 12-23% of all paediatric procedures  
31 performed(25,58,92). Children were more likely to require laparotomies following combat  
32 trauma compared to paediatric non-combat, and primarily blunt, abdominal trauma (13 vs  
33 2%). Children in combat zones were also twice as likely to undergo laparotomies compared  
34 to US service personnel (12% vs 6%)(68). In addition to the high prevalence of abdominal  
35 injuries, children frequently swallow air when frightened or in pain, resulting in gastric  
36 dilation. As well as increasing vomiting risk, this may erroneously suggest abdominal  
37 injury(89) and lead to laparotomy. Despite this, Arafat et al(61) noted that only 8% of  
38 laparotomies were negative, supporting the role of explorative laparotomies in penetrating  
39 trauma following blasts.  
40  
41  
42  
43  
44  
45  
46

47 Compared to both adults and children in non-conflict settings, the blast injured child is more  
48 likely to sustain injuries to the chest. While abdominal injuries are less frequent, they are  
49 more likely to involve visceral damage and require operative management compared to adult  
50 combat trauma.  
51  
52  
53  
54

### 55 **Extremity injuries**

56  
57 Extremity injury is one of the defining features following blast related trauma. Extremity  
58 injuries within conflict zones are observed in just under half of children (45%), its prevalence  
59  
60



1  
2  
3 increasing in blast injuries (69%)(49), with a retrospective study finding 100% of traumatic  
4 amputations and 96% of bone injuries to hand and foot were secondary to blast injuries(39).  
5  
6

7 Studies describe extreme variation in the prevalence of upper limb injuries following blasts,  
8 ranging from 6-74% (13,25,40,41,47,48,58,67,69,29,32,33,35-39), with the greatest upper  
9 limb injury reported following UXO and cluster munition strike(41,44). Compared to adult and  
10 particularly following ERW blast, children were more likely to sustain upper limb injuries  
11 (62,67,70-73) with a corresponding increase of 150-300% requiring operative amputation,  
12 typically at the level of the finger (37,66,71,72). Traumatic amputation of the upper limb was  
13 common and limited to the hands in 44-94% of children sustaining upper limb injuries(38,41),  
14 while trans-radial and trans-humeral amputation was less frequent (14-34%)(25,48) but were  
15 more likely to be bilateral(79). Arm fractures necessitating surgical fixation were observed in  
16 45%(29), while upper limb vasculature was commonly disrupted(17,32,48).  
17  
18  
19  
20  
21  
22  
23

24 Similarly, prevalence of lower limb injuries shows variation between studies on blast  
25 affecting 25-86% of children(13,25,48,67,29,35-38,40,41,47), with landmine strikes  
26 particularly associated with lower limb injury(35,37,41); 20-29% required operative  
27 amputations, normally at the trans-tibial plane(37,38,79). Lower limb injuries were less  
28 common in children compared to adults(62,70,72-74), with incidence lowest in 0-3 year  
29 olds(22), while increasing in adolescents to mirror adults(62). Traumatic amputations were  
30 less frequent compared to the upper limb, occurring in 14-35% of lower limb  
31 injuries(25,41,48).  
32  
33  
34  
35  
36  
37

38 Landmines drive debris, footwear and clothing upward between planes of the soft tissues  
39 and bone, leading to degloving injuries of the leg, perineum and lower abdominal viscera, as  
40 well creating serious potential for soft tissue and bone infection in the remaining limb(84,90).  
41 While large bony defects of the lower limb are problematic in children(93), reconstruction  
42 with limited shortening (<2 cm) has been associated with good outcomes, with the capability  
43 for highly active growth plates to remodel and compensate for this (39,94). However, 75% of  
44 new growth occurs in the distal femur and tibia growth plates, with the distal limb most prone  
45 to explosive disruption(84).  
46  
47  
48  
49  
50

51 The long term physical, psychosocial and financial repercussions of amputation must not be  
52 underestimated. Physical complications are greatest following TA and below knee  
53 amputations, and include anterior and varus bowing, heterotopic ossification and osseous  
54 overgrowth requiring operative or prosthetic revision(95). Overgrowth is particularly  
55 problematic in younger patients (under 12 years), with 15% of patients sustaining  
56 amputations requiring re-vision of their stump. Protracted phantom limb sensation (PLS) and  
57  
58  
59  
60

phantom limb pain (PLP) is reported in over 50% of children following blast related amputation, similar to that seen in adult literature following blasts(96), yet over five times higher than in children requiring amputation following non-traumatic indications such as malignancy. Increased PLS has been reported in lower limb amputations, while PLP was increased in upper limb amputations (22,100). Social acceptance of the child amputee is culturally specific, with stigmatisation in certain cultures negatively impacting the child's psychological, social and educational status(97). While there is a paucity of outcome and long term costing studies in LMICs, the financial burden of prolonged rehabilitation and repeated revision of prosthesis on the children and host country's health system is likely to be considerable(97).

Like adults involved in blast trauma, older and adolescents children are prone to extremity injury, particularly of the upper limb, while infants and toddlers experience less extremity injuries. Limb injury causes diverse complications in the growing child with increased requirement for re-revision compared to adults.

### **Burn injuries**

Multiple retrospective studies have noted that the majority of burns in children result from civilian mechanisms such as scalding, open fires and flash burns from household cooking fuels (15,16,46,98,99), while approximately 9-12% is the result of high-order explosives observed in combat blast modalities(46,99), less than observed in adult combat populations (52%)(100). Unlike civilian mechanisms however, blast-induced burns rarely occur in isolation, with multidimensional injuries playing a significant role in the child's prognosis(33,50,99). While post-mortem findings following the Syrian Civil War attributed only 0.5% of deaths being secondary to burns(63), conflict-related burn victims had higher mortality compared to non-conflict related burn victims (47% vs 3%)(98), and significantly greater than blast related burns in adult military populations (5%)(100). Severe burns following blasts were sustained in 30% of children, and fatal in 36-40%(18,40).

Creamer(38) noted the median age of burn victims as 6 years old. At this young age, the anatomical disproportionality of the child increases the total body surface area (TBSA), resulting in significant burn surface area (BuSA). Thus, approximately half of paediatric burns in conflict zones result in BuSA >15% (32,127), while 13% of children have BuSA exceeding 40%(127). A high BuSA exceeding 40% has been linked to myocardial damage and hypotension, making hemodynamic management challenging, while complications including nosocomial infection of the burn eschar and pneumonia are not uncommon(98).

1  
2  
3 Within LMICs, protein loss and weight based fluid resuscitation is complicated by  
4 malnourishment, while cold fluids may accentuate hypothermia(46).  
5  
6

7 In conflict related burns, the head and neck are most frequently affected, potentially leading  
8 to thermal inhalation injuries(50,99). Thermal inhalation injuries in paediatric victims are  
9 difficult to assess, and clues to inhalational injuries such as increased respiratory rate may  
10 be incorrectly interpreted in the context of physiological age discrepancies. In addition the  
11 paediatric subglottis represents the narrowest section of the upper airway, and deteriorates  
12 rapidly from burn-induced laryngeal oedema, especially in the context of failed intubation  
13 attempts(101) leading to rapid oxygen desaturation. Between 21-33% of children were  
14 identified as having inhalational injuries requiring pre-emptive or immediate intubation to  
15 protect the airways(50,53), similar to that seen in adult combat casualties (26%)(100). Of this  
16 paediatric cohort with inhalational injuries, 39% died(50), significantly greater than in adult  
17 populations (4%)(100).  
18  
19  
20  
21  
22  
23  
24  
25

26 Prognosticating factors noted for burns include increased time to presentation, prolonged  
27 hospital length of stay and requirement for critical care input(98). This relates to the  
28 resource-intensive management of the paediatric burns patient. Like adults, hospital length  
29 of stay for burns patients are 2-3 times that of the general paediatric population(36,99), while  
30 ICU requirements are increased, particularly in burns secondary to blast injuries(98,99).  
31 Operative demands of paediatric burn victims are significant. Children aged 6 months to 3  
32 years were between 4-14 times more likely than adults to require surgical input , reflecting  
33 the significant burden of burns (39% of this cohort compared to 2-6% in adults(102)). While  
34 other conditions may be treated by a single operation, burns often require serial  
35 procedures(102), with an average 2 operations per patient. This creates a disproportionate  
36 operative volume in both adults and paediatric patients compared to other surgical  
37 emergencies(102). Burns induced by blast injuries require more escharotomies (27% vs 4%  
38  $P<0.001$ ) and fasciotomies (67% vs 30%  $P=0.002$ ) when compared to civilian burn  
39 mechanisms(98).  
40  
41  
42  
43  
44  
45  
46  
47  
48

49 Additionally, the requirement for post-operative support and rehabilitation add to the  
50 resource requirements. Children are rarely left without functional sequelae, with limited joint  
51 mobility and impaired tactile sensation presenting significant future challenges for  
52 rehabilitation(103), while high rates of psychological morbidity including suicidal ideation  
53 have been reported in adolescents(104). Under-resourcing psychological and functional  
54 rehabilitation will likely lead to high rates of morbidity and mortality(102). The degree to  
55 which these services are available within conflict zones and LMICs is uncertain. Ethical  
56 questions naturally arise when performing interventions where health systems are unlikely to  
57  
58  
59  
60

1  
2  
3 address a child's long term needs. Examination of existing paediatric burn services within  
4 zones of interest and longer term follow up of paediatric blast burn patients are required to  
5 determine the problems and needs for this cohort.  
6  
7

## 8 9 **Service provision**

10  
11 Relative to total admissions, paediatric victims affected by blasts constitute a  
12 disproportionately large resource burden on operative workload, as well as intensive care  
13 and hospital beds. Approximately 47-82% of paediatric blast victims require  
14 surgery(22,33,36,58,61), particularly adolescents(22). The requirement for multiple operative  
15 procedures were common in the paediatric cohort, especially in burn and orthopaedic  
16 surgery due to the requirement for surgical revision (34-80% of children required  $\geq 2$   
17 procedures(16,18,36,38-40,42,54); 25% required  $\geq 4$  procedures)(16). Operative  
18 requirement was greatest in 9-14 year olds, requiring on average 5 procedures per patient,  
19 prolonged ICU and hospital stay, while 0-3 year olds required the least operative  
20 management(20). This study suggested the reduced requirement for operative input in 0-3  
21 year olds may be due not only to the reduced burden of extremity injuries requiring repeated  
22 debridement, but potentially because the equipment was inappropriate for this young cohort.  
23 This is supported by observations that infants and young children aged 0-10 years old with  
24 an Injury Severity Score  $\geq 15$  were 4x less likely to go to surgery compared to adults, while  
25 adolescents (11-15 years) were 2x more likely to receive operative input(22).  
26  
27  
28  
29  
30  
31  
32  
33  
34  
35

36 Multidisciplinary surgical services were required in 80% of patients, with orthopaedic, plastic,  
37 general neurosurgical, ophthalmic and vascular surgeons often working in partnership(48).  
38 Debridement and primary skin closure represented the most common procedure, in 35-  
39 100% of studies(25,29,36-38,47,58,68), in keeping with shrapnel injuries leading to multiple  
40 and frequently contaminated superficial injuries(29,47). Children are likely to do well with  
41 thorough debridement, with well perfused tissues allowing optimal healing and scar  
42 formation(39,94).  
43  
44  
45  
46  
47

48 Retrospective studies of US military medical treatment facilities (MTF) in Afghanistan have  
49 found that while children comprised only 3-6% of their total admissions, this demographic  
50 required approximately double the total bed spaces (7-11%)(14,19,53), and on average 3x  
51 the length of stay (LOS) of coalition troops admitted over the same time period(14,68).  
52 Approximately 40% of paediatric admissions required a LOS exceeding 7 days, while, in half  
53 , the LOS exceeded 14 days(10,33). Spinella et al noted that while children aged 11-17 were  
54 the greatest proportion of children occupying beds, <1 year old cohort had the longest  
55  
56  
57  
58  
59  
60

1  
2  
3 stay(68). This contrasts with other studies finding young children <8 years old had the  
4 shortest LOS, while children(8-14 years old) had the longest(14,18).  
5  
6

7  
8 A similar burden is observed in the intensive care unit (ICU), with between 20-45% children  
9 requiring ICU admission(5,30,33,36,43,50,53,54,61), the majority following explosive or  
10 ballistic trauma. Children were often younger (0-10 years old)(22), with one recent study  
11 noting children aged <1 year and 1-4 years most often requiring admission (53 & 66%  
12 respectively)(30). Children under 8 required a ICU LOS over twice that of children aged >8  
13 years (52). Harris et al(5) noted that despite representing only 12% of admissions, children  
14 occupied on average 35% of ICU beds, with a brief surge in numbers resulting in 100%  
15 occupancy from children, the majority requiring ventilatory and ionotropic support. This  
16 specialised service was often provided by non-paediatric experts, which could result in 2  
17 healthcare providers per paediatric patient(5). Ventilatory equipment is often age specific,  
18 and although multiple examples of ingenuity and adaptation of adult equipment exist(5,54),  
19 children may overwhelm the unprepared MTF.  
20  
21  
22  
23  
24  
25

26  
27 One of the key challenges is providing sustainable health services in the host country. MTFs  
28 may be capable of delivering exceptional paediatric care in the acute phase following blasts,  
29 but recovery from morbidity is dependent on long term rehabilitation(94) normally provided  
30 by the host country. Not only can this place exceptional strain on local health authorities, but  
31 if provisions are not available, the child is likely to undergo a protracted decline(5,94).  
32 Failures to secure recovery in the long term is likely to result in the limitations in observing  
33 the Articles of the UNCRC, as listed in the Introduction to this review.  
34  
35  
36  
37  
38

39  
40 Reasons for the high rate of admission and prolonged stay may be multifactorial. Admission  
41 criteria for host nationals to a coalition MTF typically require threat to life, limb, or eyesight,  
42 with resulting prolonged stay. Interestingly however, children with mild to moderate traumata  
43 are three times more likely than adults to be admitted (22). This may reflect a lack of  
44 certainty in initial assessment of injury severity from health practitioners unaccustomed to  
45 dealing with children. Within conflict zones, rearwards evacuation of civilians is not always  
46 possible, and health interventions such as ventilatory support may not be sustainable by  
47 host countries without deterioration in service standards, leading to prolonged admission  
48 until the child can be safely moved(5).  
49  
50  
51  
52  
53

54  
55 Following up recovery is a recurring theme when exploring long term challenges of blast  
56 injuries in children(6). Children are a complex cohort to monitor. Geographical displacement,  
57 particularly in the context of a conflict, increases the likelihood of this vulnerable cohort being  
58 lost to follow-up. This can impact not only the child's rehabilitation and coordination with local  
59  
60

1  
2  
3 health authorities, but also cause difficulty in assessing long-term functional outcomes which  
4 are needed to detect future health needs. Increasingly there is recognition of the need for  
5 formalised trauma registries accessible in the host country, assisting the follow-up of this  
6 vulnerable demographic(6,18,19,53).  
7  
8  
9

## 10 11 **Conclusion** 12

13  
14 This review has focused on research based on those child patients injured by blast primarily  
15 (although not exclusively) in conflict zones in the Middle East and Afghanistan. Although  
16 the papers under review were written by authors from a wide variety of nationalities and  
17 professions that encounter paediatric blast injury and its effects, they all wrote in English for  
18 journals which assumed a level of English fluency in their readership. Non-English  
19 research, both written and published in non-English journals was outside the purview of the  
20 study. The authors of the study sincerely hope that future work will be able to address this  
21 by comparing research on paediatric blast injury done in settings and with study parameters  
22 that may differ from those considered here. In doing so a truly global understanding of the  
23 condition may be achieved, beyond our focus on today's conflict zones.  
24  
25  
26  
27  
28  
29  
30

31 Most paediatric blast injury is inflicted in these settings but is not exclusive to them. In Britain  
32 in May 2017, a bomb detonated at the Manchester Arena killing 23 people and injuring 139,  
33 most of whom were children. The attack placed a sudden and significant burden on medical  
34 services in the city, which had no experience of paediatric blast injury in the 21<sup>st</sup> century, let  
35 alone on this kind of scale.  
36  
37  
38  
39

40 Wherever in the world they live, and whatever the circumstances of the explosion, the social  
41 and anatomical profile of children makes them uniquely vulnerable to one of the most  
42 complex and demanding trauma conditions that any medical professional or system can  
43 treat. This paper has characterised paediatric blast as a diverse injury pattern, which must  
44 be seen as distinct from its adult equivalent. This pattern should be fully understood from  
45 point of wounding through the post-operative and rehabilitation phases of treatment. This  
46 continuum approach would enable both better long-term care of the patient, and improved  
47 support of medical systems bearing the intense burden of that care.  
48  
49  
50  
51  
52

53 It remains to be seen whether the monitoring of the long term effects of paediatric blast injury  
54 in well-resourced environments is any better than that in areas of instability. Monitoring of  
55 patient outcomes should be integrated with the monitoring of treatment so that relevant  
56 practice and skills can be continually assessed. Thus the authors join with other  
57 organisations concerned with the welfare of the world's children (such as the recently  
58  
59  
60

1  
2  
3 established BRANCH Consortium - *Bridging Research and Action in Conflict Settings for the*  
4 *Health of Women and Children*) in calling for immediate action to fill the evidence and policy  
5 gaps relating to child conflict injury and the interventions needed to improve its long term  
6 outcomes.  
7  
8  
9

10 It has been our intention in conducting this review to provide specific technical medical detail  
11 of one of the greatest horrors in our world today – that of the direct effects of war on children.  
12 We hope it will be useful to everyone, from medical researchers to humanitarian  
13 organisations, who seek to mitigate those effects, and secure the safety and wellbeing of  
14 children wherever they grow up. It is not only coherence in treatment and understanding of  
15 child blast injury that is required, it is a restatement of global commitment to the UN  
16 Convention on the Rights of Child, so that today's horrors will not become those of  
17 tomorrow.  
18  
19  
20  
21  
22  
23  
24  
25  
26  
27  
28  
29

### 30 **Acknowledgments**

31  
32 The authors are grateful to Dr David Inwald for his detailed comments on this review.  
33  
34  
35  
36  
37  
38  
39  
40

### 41 **References**

- 42  
43 1. Frost A, Boyle P, Autier P, King C, Zwijnenburg W, Hewitson D, et al. Articles The  
44 effect of explosive remnants of war on global public health: a systematic mixed-  
45 studies review using narrative synthesis. *Lancet Public Heal.* 2017;2(2):e286–96.  
46  
47
- 48 2. Wolf SJ, Bebarta VS, Bonnett CJ, Pons PT, Cantrill S V. Blast injuries. *Lancet.* 2009  
49 Aug;374(9687):405–15.  
50  
51
- 52 3. Champion HR, Holcomb JB, Young LA. Injuries from explosions: physics, biophysics,  
53 pathology, and required research focus. *J Trauma.* 2009;66(May):1468–1477;  
54 discussion 1477.  
55  
56
- 57 4. UNICEF. United Nations Convention on the Rights of the Child [Internet]. 1989 [cited  
58 2017 Sep 1]. Available from: <https://downloads.unicef.org.uk/wp->  
59  
60

- 1  
2  
3 content/uploads/2010/05/UNCRC\_united\_nations\_convention\_on\_the\_rights\_of\_the\_  
4 child.pdf?\_ga=2.85767705.181858325.1504263661-1041319099.1504263661  
5  
6  
7 5. Harris CC, McNicholas JJ. Paediatric intensive care in the field hospital. *J R Army*  
8 *Med Corps.* 2009;155(2):157–9.  
9  
10  
11 6. Bull A, Mayhew E, Reavley P, Tai N, Taylor S. Comment Paediatric blast injury :  
12 challenges and priorities. *Lancet child Adolesc Heal.* 2018;4642(18):20–1.  
13  
14 7. Bree S, Wood K, Nordmann GR, Mcnicholas J. The Paediatric Transfusion Challenge  
15 on Deployed Operations. 156.  
16  
17  
18 8. Diana G, Msn R, Sally K, Singh T. Using System Change as a Method of  
19 Performance / Quality Improvement ... 2010;  
20  
21  
22 9. Aharonson-Daniel L, Waisman Y, Dannon YL, Peleg K. Epidemiology of Terror-  
23 Related Versus Non-Terror-Related Traumatic Injury in Children. *Pediatrics.* 2003  
24 Oct;112(4):e280–e280.  
25  
26  
27 10. Aharonson-Daniel L, Klein Y, Peleg K. Suicide bombers form a new injury profile. *Ann*  
28 *Surg.* 2006 Dec;244(6):1018–23.  
29  
30  
31 11. Amir LD, Aharonson-Daniel L, Peleg K, Waisman Y, Alfici R, Ishtov E, et al. The  
32 severity of injury in children resulting from acts against civilian populations. *Ann Surg.*  
33 2005 Apr;241(4):666–70.  
34  
35  
36 12. Bilukha OO, Leidman EZ, Sultan A-SSSS, Jaffar Hussain S. Deaths due to Intentional  
37 Explosions in Selected Governorates of Iraq from 2010 to 2013: Prospective  
38 Surveillance. *Prehosp Disaster Med.* 2015 Dec 30;30(6):586–92.  
39  
40  
41 13. Bitterman Y, Benov A, Glassberg E, Satanovsky A, Bader T, Sagi R, et al. Role 1  
42 Pediatric Trauma Care on the Israeli-Syrian Border-First Year of the Humanitarian  
43 Effort. *Mil Med.* 2016 Aug;181(8):849–53.  
44  
45  
46 14. Borgman M, Matos RI, Blackbourne LH, Spinella PC. Ten years of military pediatric  
47 care in Afghanistan and Iraq. *J Trauma Acute Care Surg.* 2012 Dec;73(6 SUPPL.  
48 5):S509–13.  
49  
50  
51 15. Borgman MA, Matos RI, Spinella PC. Isolated pediatric burn injury in Iraq and  
52 Afghanistan. *Pediatr Crit Care Med.* 2015;16(2):e23–7.  
53  
54  
55 16. Creamer KM, Edwards MJ, Shields CH, Thompson MW, Yu CE, Adelman W.  
56 Pediatric Wartime Admissions to US Military Combat Support Hospitals in Afghanistan  
57 and Iraq: Learning from the First 2,000 Admissions. *J Trauma - Inj Infect Crit Care.*  
58  
59  
60



- 2009 Oct;67(4):762–8.
17. Dua A, Via KC, Kreishman P, Kragh JF, Spinella PC, Patel B, et al. Early management of pediatric vascular injuries through humanitarian surgical care during U.S. military operations. In: *Journal of Vascular Surgery*. 2013. p. 695–700.
  18. Edwards MJ, Lustik M, Eichelberger MR, Elster E, Azarow K, Coppola C. Blast injury in children: an analysis from Afghanistan and Iraq, 2002-2010. *J Trauma Acute Care Surg*. 2012 Nov;73(5):1278–83.
  19. Edwards MJ, Lustik M, Burnett MW, Eichelberger M. Pediatric inpatient humanitarian care in combat: Iraq and Afghanistan 2002 to 2012. *J Am Coll Surg*. 2014;218(5):1018–23.
  20. Edwards MJ, Lustik M, Carlson T, Tabak B, Farmer D, Edwards K, et al. Surgical interventions for pediatric blast injury: an analysis from Afghanistan and Iraq 2002 to 2010. *J Trauma Acute Care Surg*. 2014 Mar;76(3):854–8.
  21. Hillman CM, Rickard A, Rawlins M, Smith JE. Paediatric traumatic cardiac arrest: Data from the joint theatre trauma registry. *J R Army Med Corps*. 2016 Aug;162(4):276–9.
  22. Jaffe DH, Peleg K. Terror explosive injuries: a comparison of children, adolescents, and adults. *Ann Surg*. 2010 Jan;251(1):138–43.
  23. Khan I, Khan N, Naeem R, Kerai S, Allen K, Zia N, et al. Bomb blast injuries: an exploration of patient characteristics and outcome using Pakistan National Emergency Departments Surveillance (Pak-NEDS) data. *BMC Emerg Med*. 2015;15 Suppl 2:S7.
  24. Kluger Y, Peleg K, Daniel-Aharonson L, Mayo A. The special injury pattern in terrorist bombings. *J Am Coll Surg*. 2004;199(6):875–9.
  25. Mckechnie PS, Wertin T, Parker P, Eckert M. Pediatric Surgery Skill Sets in Role 3: The Afghanistan Experience. *Mil Med*. 2014 Jul;179(7):762–5.
  26. Naylor JF, April MD, Roper JL, Hill GJ, Clark P, Schauer SG. Emergency department imaging of pediatric trauma patients during combat operations in Iraq and Afghanistan. 2018;620–5.
  27. Neff LP, Cannon JW, Morrison JJ, Edwards MJ, Spinella PC, Borgman MA, et al. Clearly defining pediatric massive transfusion: cutting through the fog and friction with combat data. *J Trauma Acute Care Surg*. 2015;78(1):22-8; discussion 28-9.
  28. Patregnani JT, Borgman MA, Maegele M, Wade CE, Blackbourne LH, Spinella PC.

- 1  
2  
3 Coagulopathy and shock on admission is associated with mortality for children with  
4 traumatic injuries at combat support hospitals. *Pediatr Crit Care Med*.  
5 2012;13(3):273–7.  
6  
7  
8  
9 29. Quintana DA, Jordan FB, Tuggle DW, Mantor PC, Tunell WP, Parker JR, et al. The  
10 spectrum of pediatric injuries after a bomb blast. *J Pediatr Surg*. 1997 Feb;32(2):307–  
11 11.  
12  
13  
14 30. Schauer SG, Hill GJ, Naylor JF, April MD, Borgman M, Beberta VS. Emergency  
15 department resuscitation of pediatric trauma patients in Iraq and Afghanistan. *Am J*  
16 *Emerg Med*. 2018 Jan;1–5.  
17  
18  
19 31. Smith JEE, Kehoe A, Harrison SEE, Russell R, Midwinter M. Outcome of penetrating  
20 intracranial injuries in a military setting. *Injury*. 2014 May;45(5):874–8.  
21  
22  
23 32. Villamaria CY, Morrison JJ, Fitzpatrick CM, Cannon JW, Rasmussen TE. Wartime  
24 vascular injuries in the pediatric population of Iraq and Afghanistan: 2002-2011. *J*  
25 *Pediatr Surg*. 2014 Mar;49(3):428–32.  
26  
27  
28 33. Waisman Y, Aharonson-Daniel L, Mor M, Amir L, Peleg K. The impact of terrorism on  
29 children: a two-year experience. *Prehospital Disaster Med*. 2003;18(3):242–8.  
30  
31  
32 34. Woods KL, Russell RJ, Bree S, Mahoney PF, McNicholas J. The pattern of paediatric  
33 trauma on operations. *J R Army Med Corps*. 2012 Mar;158(1):34–7.  
34  
35  
36 35. Al-Worikat AF. Landmine amputees referred to the Royal Medical Services-Jordan.  
37 *Prosthet Orthot Int*. 2001 Aug;25(2):108–12.  
38  
39  
40 36. Arul GS, Reynolds J, DiRusso S, Scott A, Bree S, Templeton P, et al. Paediatric  
41 admissions to the British military hospital at Camp Bastion, Afghanistan. *Ann R Coll*  
42 *Surg Engl*. 2012 Mar;94(1):52–7.  
43  
44  
45 37. Bajec J, Gang RK, Lari AR. Post Gulf war explosive injuries in liberated Kuwait. *Injury*.  
46 1993 Sep;24(8):517–20.  
47  
48  
49 38. Beitler AL, Wortmann GW, Hofmann LJ, Goff Jr JM. Operation Enduring Freedom: the  
50 48th Combat Support Hospital in Afghanistan. *Mil Med*. 2006;171(3):189–93.  
51  
52  
53 39. Bertani A, Mathieu L, Dahan J-L, Launay F, Rongieras F, Rigal S. War-related  
54 extremity injuries in children: 89 cases managed in a combat support hospital in  
55 Afghanistan. *Orthop Traumatol Surg Res*. 2015 May;101(3):365–8.  
56  
57  
58 40. C.P. C, B.E. L, T.E. R. Children treated at an expeditionary military hospital in Iraq.  
59 *Arch Pediatr Adolesc Med*. 2006;160(9):972–6.  
60

- 1
  - 2
  - 3
  - 4
  - 5
  - 6
  - 7
  - 8
  - 9
  - 10
  - 11
  - 12
  - 13
  - 14
  - 15
  - 16
  - 17
  - 18
  - 19
  - 20
  - 21
  - 22
  - 23
  - 24
  - 25
  - 26
  - 27
  - 28
  - 29
  - 30
  - 31
  - 32
  - 33
  - 34
  - 35
  - 36
  - 37
  - 38
  - 39
  - 40
  - 41
  - 42
  - 43
  - 44
  - 45
  - 46
  - 47
  - 48
  - 49
  - 50
  - 51
  - 52
  - 53
  - 54
  - 55
  - 56
  - 57
  - 58
  - 59
  - 60
41. Can M, Yildirimcan H, Ozkalipci O, Melek M, Edirne Y, Bicer U, et al. Landmine associated injuries in children in Turkey. *J Forensic Leg Med.* 2009 Nov;16(8):464–8.
42. El H, Agard E, Dot C. Cephalic region war injuries in children : Experience in French NATO hospital in Kabul Afghanistan. *Injury.* 2018;49(9):1703–5.
43. Er E, Kerem Ş, Güler S, Aslan Ş, Seviner M, Aksel G, et al. American Journal of Emergency Medicine Analyses of demographical and injury characteristics of adult and pediatric patients injured in Syrian civil war ☆. 2017;35:82–6.
44. Fares Y, Ayoub F, Fares J, Khazim R, Khazim M, Gebeily S. Pain and neurological sequelae of cluster munitions on children and adolescents in South Lebanon. *Neurol Sci.* 2013 Nov 7;34(11):1971–6.
45. Fares Y, Fares J, Gebeily S. Head and facial injuries due to cluster munitions. *Neurol Sci.* 2014 Jun;35(6):905–10.
46. Gurney I. Paediatric casualties during OP TELIC. *J R Army Med Corps.* 2004;150(4):270–2.
47. Hinsley DE, Rosell PAE, Rowlands TK, Clasper JC. Penetrating missile injuries during asymmetric warfare in the 2003 Gulf conflict. *Br J Surg.* 2005 May;92(5):637–42.
48. Hodalic Z, Svagelj M, Sebalj I, Sebalj D. Surgical treatment of 1,211 patients at the Vinkovci General Hospital, Vinkovci, Croatia, during the 1991-1992 Serbian offensive in east Slavonia. *Mil Med.* 1999 Nov;164(11):803–8.
49. Inwald DP, Arul GS, Montgomery M, Henning J, McNicholas J, Bree S. Management of children in the deployed intensive care unit at Camp Bastion, Afghanistan. *J R Army Med Corps.* 2014 Sep;160(3):236–40.
50. Jeevaratnam JA, Pandya AN. One year of burns at a role 3 medical treatment facility in Afghanistan. *J R Army Med Corps.* 2014 Mar;160(1):22–6.
51. Klimo P, Ragel BT, Scott WH, McCafferty R. Pediatric neurosurgery during Operation Enduring Freedom. *J Neurosurg Pediatr.* 2010 Aug;6(2):107–14.
52. RI M, JB H, Callahan C, PC S. Increased mortality rates of young children with traumatic injuries at a US Army combat support hospital in Baghdad, Iraq, 2004. *Pediatrics.* 2008;122(5):e959-66.
53. McGuigan R, Spinella PC, Beekley A, Sebesta J, Perkins J, Grathwohl K, et al. Pediatric trauma: experience of a combat support hospital in Iraq. *J Pediatr Surg.*

- 1  
2  
3 2007 Jan;42(1):207–10.  
4  
5  
6 54. Nordmann GR. Paediatric anaesthesia in Afghanistan: a review of the current  
7 experience. *J R Army Med Corps*. 2010 Dec;156(4 Suppl 1):323–6.  
8  
9 55. Pannell D, Poynter J, Wales PW, Tien H, Nathens AB, Shellington D. Factors  
10 affecting mortality of pediatric trauma patients encountered in Kandahar, Afghanistan.  
11 *Can J Surg*. 2015 Jun;58(3):S141–5.  
12  
13  
14 56. Pearce P. Preparing to care for paediatric trauma patients. *J R Army Med Corps*.  
15 2015;161(Suppl 1):i52–5.  
16  
17  
18 57. Terzić J, Mestrovic J, Dogas Z, Furlan D, Biocic M. Children war casualties during the  
19 1991-1995 wars in Croatia and Bosnia and Herzegovina. *Croat Med J*.  
20 2001;42(2):156–60.  
21  
22  
23 58. Thompson DC, Crooks RJ, Clasper JC, Lupu A, Stapley SA, Cloke DJ. The pattern of  
24 paediatric blast injury in Afghanistan. *J R Army Med Corps*. 2017 Oct;  
25  
26  
27 59. Walker N, Russell RJ, Hodgetts TJ. British Military Experience of Pre-Hospital  
28 Paediatric Trauma in Afghanistan. 156(3):150–3.  
29  
30  
31 60. Armed US. Pediatric Trauma Experience in a Combat Support Hospital in Eastern  
32 Afghanistan Over 10 Months , 2010 to 2011. 2013;  
33  
34  
35 61. Arafat S, Alsabek MB, Ahmad M, Hamo I, Munder E. Penetrating abdominal injuries  
36 during the Syrian war: Patterns and factors affecting mortality rates. *Injury*. 2017  
37 May;48(5):1054–7.  
38  
39  
40 62. Bendinelli C. Effects of land mines and unexploded ordnance on the pediatric  
41 population and comparison with adults in rural Cambodia. *World J Surg*. 2009 May  
42 16;33(5):1070–4.  
43  
44  
45 63. Celikel A, Karaarslan B, Demirkiran DS, Zeren C, Arslan MM. A series of civilian  
46 fatalities during the war in Syria. *Ulus Travma Acil Cerrahi Derg*. 2014 Sep;20(5):338–  
47 42.  
48  
49  
50 64. Celikel A, Karbeyaz K, Kararslan B, Arslan MM, Zeren C. Childhood casualties during  
51 civil war: Syrian experience. *J Forensic Leg Med*. 2015 Aug;34:1–4.  
52  
53  
54 65. Gataa ISS, Muassa QHH. Patterns of maxillofacial injuries caused by terrorist attacks  
55 in Iraq: Retrospective study. *Int J Oral Maxillofac Surg*. 2011 Jan;40(1):65–70.  
56  
57  
58 66. Hanevik K, Kvåle G. Landmine injuries in Eritrea. 1992;1992.  
59  
60

- 1  
2  
3 67. Mirza FH, Parhyar HA, Tirmizi SZA. Rising threat of terrorist bomb blasts in Karachi--a  
4 5-year study. *J Forensic Leg Med*. 2013 Aug;20(6):747–51.
- 6  
7 68. Spinella PC, Borgman MA, Azarow KS. Pediatric trauma in an austere combat  
8 environment. *Crit Care Med*. 2008;36(7 Suppl):S293–6.
- 10  
11 69. Andersson N, da Sousa CP, Paredes S. Social cost of land mines in four countries:  
12 Afghanistan, Bosnia, Cambodia, and Mozambique. *BMJ*. 1995 Sep;311(7007):718–  
13 21.
- 15  
16 70. Bilukha OO, Brennan M, Woodruff BA. Death and Injury from Landmines and  
17 Unexploded Ordnance in Afghanistan. *J Am Med Assoc*. 2003 Aug 6;290(5):650–3.
- 19  
20 71. Bilukha OO, Brennan M, Anderson M, Tsitsaev Z, Murtazaeva E, Ibragimov R. Seen  
21 but not heard: Injuries and deaths from landmines and unexploded ordnance in  
22 Chechnya, 1994–2005. *Prehosp Disaster Med*. 2007;22(6):507–12.
- 24  
25 72. Bilukha OO, Brennan M, Anderson M. The lasting legacy of war: Epidemiology of  
26 injuries from landmines and unexploded ordnance in Afghanistan, 2002–2006.  
27 *Prehosp Disaster Med*. 2008;23(6):493–9.
- 29  
30 73. Bilukha OO, Laurence H, Danee L, Subedi KP, Becknell K. Injuries and deaths due to  
31 victim-activated improvised explosive devices, landmines and other explosive  
32 remnants of war in Nepal. *Inj Prev*. 2011 Oct 1;17(5):326–31.
- 34  
35 74. Bilukha OO, Becknell K, Laurence H, Danee L, Subedi KP. Fatal and non-fatal  
36 injuries due to intentional explosions in Nepal, 2008–2011: Analysis of surveillance  
37 data. *Confl Health*. 2013;7(1):5.
- 39  
40 75. Guerriero RM, Pier DB, de Gusmao CM, Bernson-Leung ME, Maski KP, Urion DK, et  
41 al. Increased pediatric functional neurological symptom disorders after the Boston  
42 marathon bombings: a case series. *Pediatr Neurol*. 2014 Nov;51(5):619–23.
- 44  
45 76. Guha-Sapir D, Schluter B, Rodriguez-Llanes JM, Lillywhite L, Hicks MH-R. Patterns of  
46 civilian and child deaths due to war-related violence in Syria: a comparative analysis  
47 from the Violation Documentation Center dataset, 2011–16. *Lancet Glob Heal*. 2018  
48 Jan;6(1):e103–10.
- 50  
51 77. Hemmati MA, Shokoohi H, Masoumi M, Khateri S, Soroush M, Modirian E, et al.  
52 Mental health disorders in child and adolescent survivors of post-war landmine  
53 explosions. *Mil Med Res*. 2015;2:30.
- 55  
56 78. Kinra S, Black ME. Landmine related injuries in children of Bosnia and Herzegovina  
57  
58  
59  
60

- 1  
2  
3 1991-2000: comparisons with adults. *J Epidemiol Community Health*. 2003  
4 Apr;57(4):264–5.  
5  
6  
7 79. Mousavi B, Soroush MMRM, Masoumi M, Khateri S, Modirian E, Shokoohi H, et al.  
8 Epidemiological study of child casualties of landmines and unexploded ordnances: A  
9 national study from Iran. *Prehosp Disaster Med*. 2015 Oct 16;30(5):472–7.  
10  
11  
12 80. Pat-horenczyk R, Abramovitz R, Brom D, Chemtob CM. Adolescent Exposure to  
13 Recurrent Terrorism in Israel : Posttraumatic Distress and Functional Impairment.  
14 2007;77(1):76–85.  
15  
16  
17 81. Poor Zamany Nejatkermany M, Modirian E, Soroush M, Masoumi M, Hosseini M.  
18 Phantom Limb Sensation (PLS) and Phantom Limb Pain (PLP) among Young  
19 Landmine Amputees. *Iran J child Neurol*. 2016;10(3):42–7.  
20  
21  
22  
23 82. Guha-Sapir D, Rodriguez-Llanes JM, Hicks MH, Donneau AF, Coutts A, Lillywhite L,  
24 et al. Civilian deaths from weapons used in the Syrian conflict. *BMJ*. 2015;351(April  
25 2014):1–5.  
26  
27  
28  
29 83. Surrency AB, Graitcer PL, Henderson AK. Key factors for civilian injuries and deaths  
30 from exploding landmines and ordnance. *Inj Prev*. 2007 Jun;13(3):197–201.  
31  
32  
33 84. Watts HG. The consequences for children of explosive remnants of war: Land mines,  
34 unexploded ordnance, improvised explosive devices, and cluster bombs. *J Pediatr*  
35 *Rehabil Med*. 2009;2(3):217–27.  
36  
37  
38 85. Edwards MJ, Lustik M, Eichelberger MR, Elster E, Azarow K, Coppola C. Blast injury  
39 in children. *J Trauma Acute Care Surg*. 2012 Nov;73(5):1278–83.  
40  
41  
42 86. Regional K, Regional O, Florida I. Comparison of Outcomes for Pediatric Trauma at  
43 Different Types of Trauma Centers : The Unresolved Mystery. 2016;1054–8.  
44  
45  
46 87. Owens BD, Kragh JF, Wenke JC, Macaitis J, Wade CE, Holcomb JB. Combat  
47 wounds in operation Iraqi Freedom and operation Enduring Freedom. *J Trauma*.  
48 2008;64(2):295–9.  
49  
50  
51 88. Eastridge BJ, Salinas J, Ph D, Wade CE, Ph D, Blackburne LH. Hypotension is 100  
52 mm Hg on the battlefield. *AJS*. 2011;202(4):404–8.  
53  
54  
55 89. Shuker ST. Effect of biomechanism mine explosion on children: Craniofacial injuries  
56 and management. *J Craniofac Surg*. 2013 Jul;24(4):1132–6.  
57  
58  
59 90. Coupland RM, Korver A. Injuries from antipersonnel mines: the experience of the  
60 International Committee of the Red Cross. *BMJ (Clinical Res Ed)*.

- 1  
2  
3 1991;303(6816):1509–12.  
4  
5  
6 91. Rosenfeld J V., Ford NL. Bomb blast, mild traumatic brain injury and psychiatric  
7 morbidity: A review. Vol. 41, *Injury*. 2010. p. 437–43.  
8  
9  
10 92. Ramasamy A, Hinsley DE, Edwards DS, Stewart MPM, Midwinter M, Parker PJ. Skill  
11 sets and competencies for the modern military surgeon : Lessons from UK military  
12 operations in Southern Afghanistan. *Injury*. 2010;41(5):453–9.  
13  
14 93. Franke A, Hentsch S, Bieler D, Schilling T, Weber W, Johann M, et al. Management  
15 of Soft-Tissue and Bone Defects in a Local Population: Plastic and Reconstructive  
16 Surgery in a Deployed Military Setting. *Mil Med*. 2017 Nov;182(11):e2010–20.  
17  
18 94. Nordmann GR, McNicholas JJ, Templeton PA, Arul S, Woods K. Paediatric trauma  
19 management on deployment. *J R Army Med Corps*. 2011;157(3 SUPP. 1).  
20  
21 95. Eichelberger MR. Pediatric surgery and medicine for hostile environments. Vol. 46,  
22 *Journal of Pediatric Surgery*. 2011. 1683 p.  
23  
24 96. Article O. The Experience of Phantom Limb Pain in Patients With Combat-Related  
25 Traumatic Amputations. 2008;  
26  
27 97. Cummings D. Prosthetics in the developing world: a review of the literature. *Prosthet*  
28 *Orthot Int*. 1996;20:51–60.  
29  
30 98. Buyukbese S, Budeyri A. ScienceDirect Mortality risk factors in war-related pediatric  
31 burns : A comparative study among two distinct populations. *Burns*. 2018;1–18.  
32  
33 99. Peleg K, Aharonson-Daniel L, Michael M, Shapira SC, Michaelson M, Rivkind A, et al.  
34 Patterns of injury in hospitalized terrorist victims. *Am J Emerg Med*. 2003;21(4):258–  
35 62.  
36  
37 100. Kauvar DS, Wolf SE, Wade CE, Cancio LC, Renz EM, Holcomb JB. Burns sustained  
38 in combat explosions in Operations Iraqi and Enduring Freedom (OIF/OEF explosion  
39 burns). *Burns*. 2006;32(7):853–7.  
40  
41 101. Sharma RK, Parashar A. Special considerations in paediatric burn patients. *Indian J*  
42 *Plast Surg*. 2010;43:S43-50.  
43  
44 102. Stewart BT, Trelles M, Dominguez L, Wong E, Fiozounam HT, Hassani GH, et al.  
45 Surgical burn care by médecins sans frontières-operations center Brussels: 2008 to  
46 2014. *J Burn Care Res*. 2016;37(6):e519–24.  
47  
48 103. Zeitlin REK, Järnberg J, Somppi EJ, Sundell B. Long-term functional sequelae after  
49  
50  
51  
52  
53  
54  
55  
56  
57  
58  
59  
60

1  
2  
3  
4  
5  
6  
7  
8  
9  
10  
11  
12  
13  
14  
15  
16  
17  
18  
19  
20  
21  
22  
23  
24  
25  
26  
27  
28  
29  
30  
31  
32  
33  
34  
35  
36  
37  
38  
39  
40  
41  
42  
43  
44  
45  
46  
47  
48  
49  
50  
51  
52  
53  
54  
55  
56  
57  
58  
59  
60

paediatric burns. Burns. 1998;24(1):3–6.

104. Gautam S, Gupta ID, Batra L, Sharma H, Khandelwal R, Pant A. Psychiatric morbidity among victims of bomb blast. Indian J Psychiatry. 1998 Jan;40(1):41–5.

Confidential: For Review Only



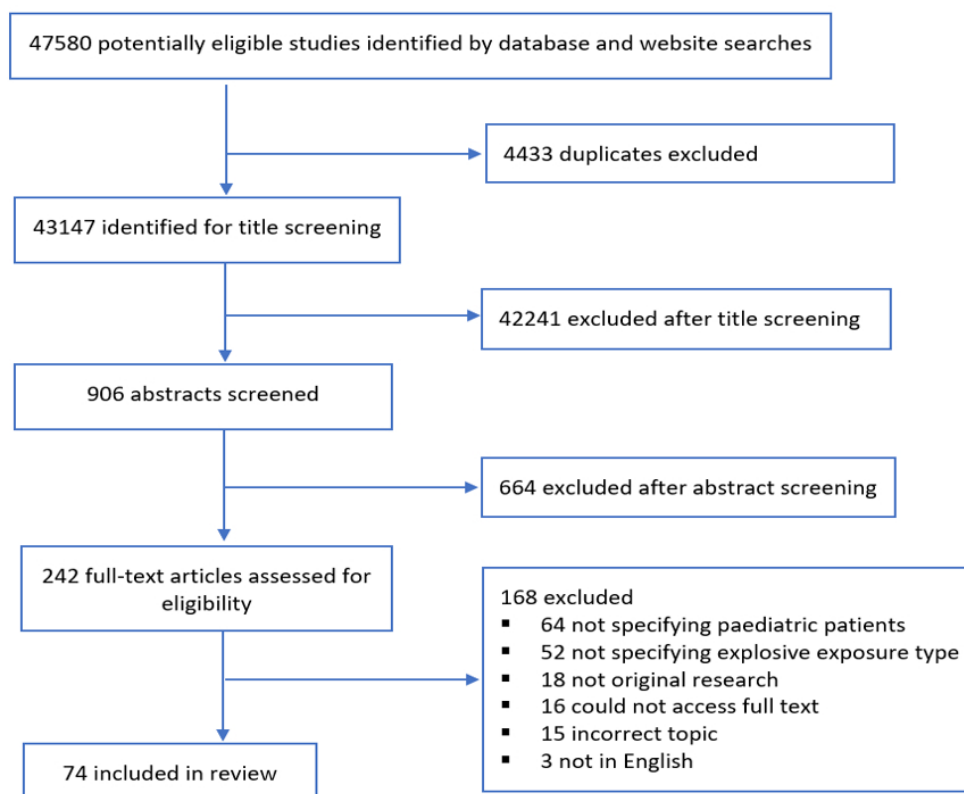

1  
2  
3  
4  
5  
6  
7  
8  
9  
10  
11  
12  
13  
14  
15  
16  
17  
18  
19  
20  
21  
22  
23  
24  
25  
26  
27  
28  
29  
30  
31  
32  
33  
34  
35  
36  
37  
38  
39  
40  
41  
42  
43  
44  
45  
46  
47  
48  
49  
50  
51  
52  
53  
54  
55  
56  
57  
58  
59  
60

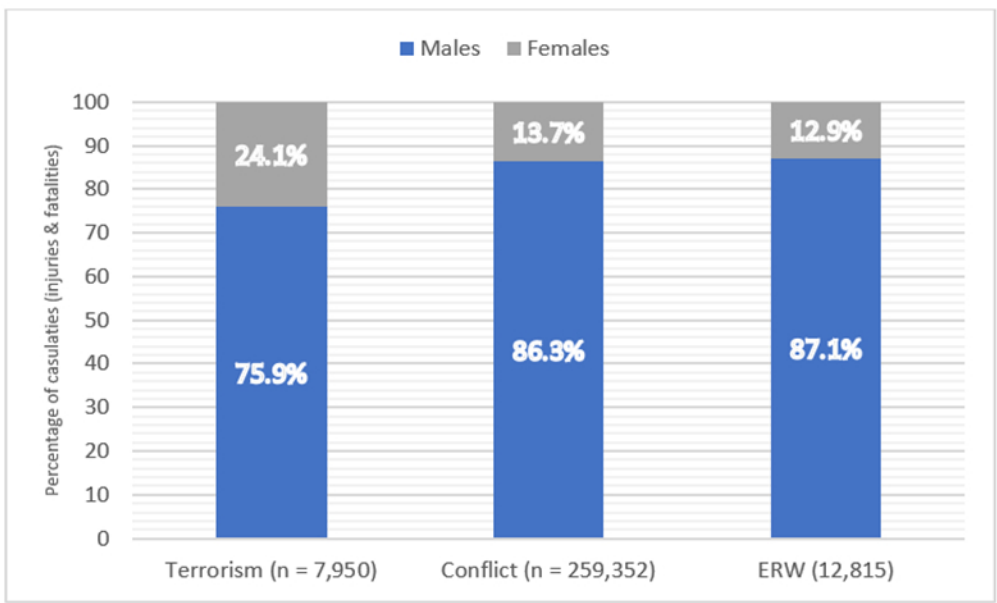



Supplement: bmjpo-2019-000452.draft_revisions.pdf [file bmjpo-2019-000452.draft_revisions.pdf]
